# Supplementary material for: Conjugation of oligonucleotides with activated carbamate reagents prepared by the Ugi reaction for oligonucleotide library synthesis
Source: Royal Society of Chemistry journal article supplement (doi:10.1039/d1cb00240f), 2022-01-01

## Supporting Information

### Conjugation of oligonucleotides with activated carbamate reagents prepared by the Ugi reaction for oligonucleotide library synthesis

Ryosuke Kita,<sup>a</sup> Takashi Osawa<sup>a</sup> and Satoshi Obika<sup>\*a,b</sup>

<sup>a</sup> Graduate School of Pharmaceutical Sciences, Osaka University, 1-6 Yamadaoka, Suita, Osaka 565-0871, Japan.

<sup>b</sup> National Institutes of Biomedical Innovation, Health and Nutrition, 7-6-8 Saito-Asagi, Ibaraki, Osaka 567-0085, Japan.

E-mail: obika@phs.osaka-u.ac.jp

#### Contents:

- **Figure S1.**  
<sup>1</sup>H NMR, <sup>13</sup>C NMR spectra of each compound..... S2–S9
- **Figure S2.**  
HPLC chromatograms after the conjugation reaction between peptoids **11–14** and **DNA 1** ... S10
- **Figure S3.**  
HPLC chromatograms after the conjugation reaction using DNA with or without an aminohexyl linker and the crude peptoid prepared by Ugi reaction..... S10
- **Figure S4.**  
HPLC chromatograms after Suzuki-coupling..... S11
- **Figure S5.**  
HPLC chromatograms after the amide bond formation reaction..... S11
- **Figure S6.**  
HPLC chart and MALDI-TOF mass spectrometry data of each conjugate compound.... S12–S88

**Figure S1.**  $^1\text{H}$  NMR,  $^{13}\text{C}$  NMR spectra of each compound

(a)  $^1\text{H}$  NMR ( $\text{CDCl}_3$ ) of compound **2**

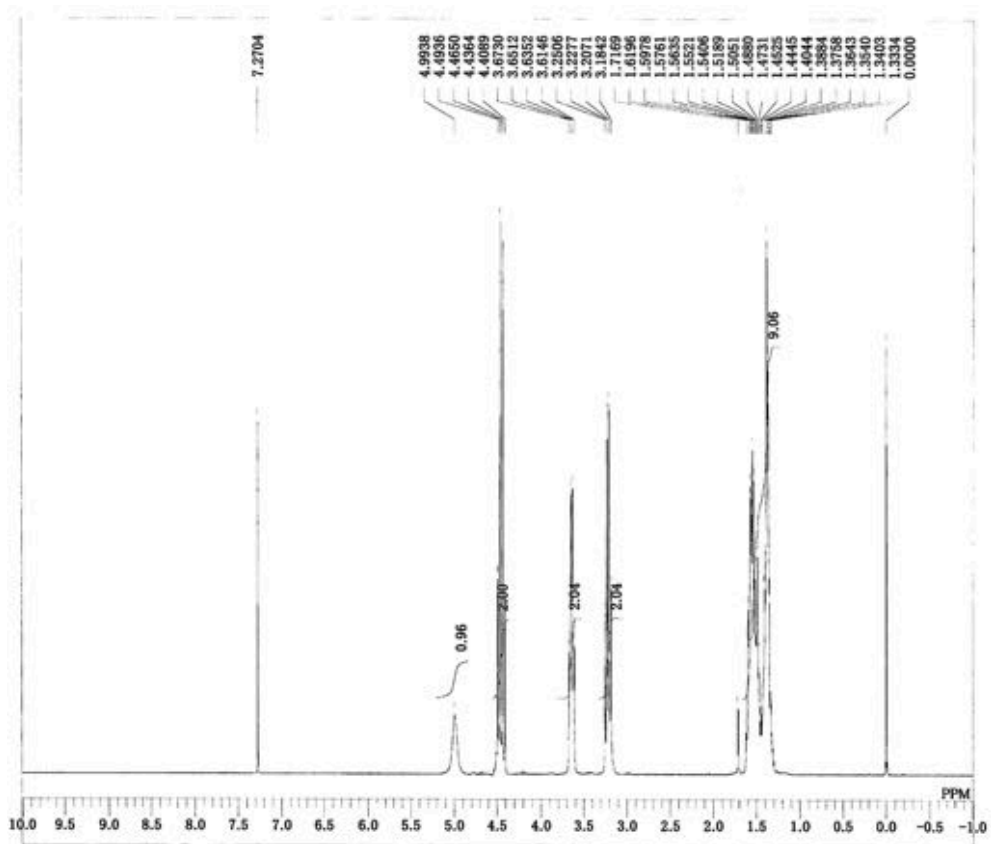

$^{13}\text{C}$  NMR ( $\text{CDCl}_3$ ) of compound **2**

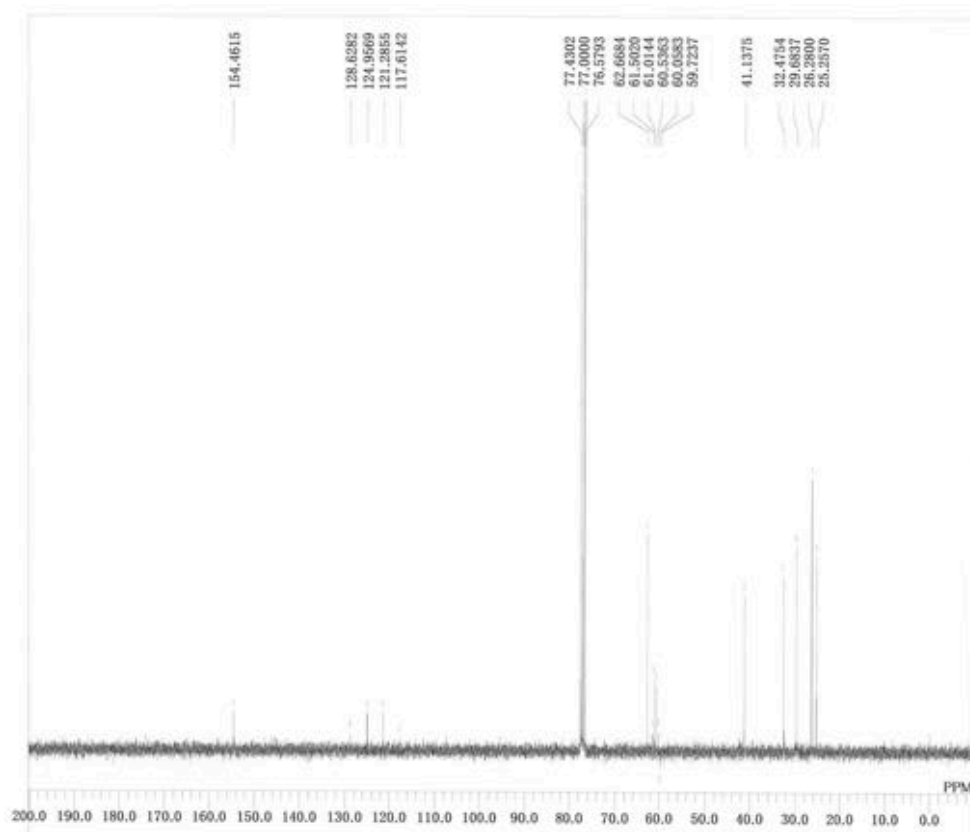

(b)  $^1\text{H}$  NMR ( $\text{CDCl}_3$ ) of compound **3**

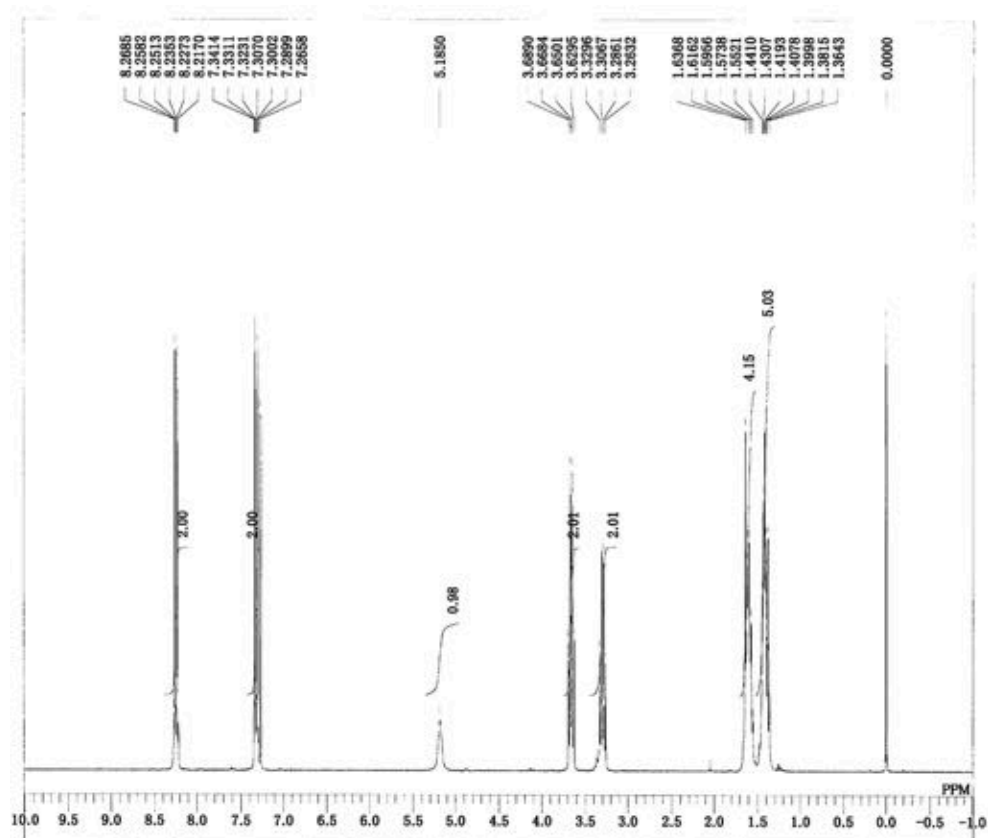

$^{13}\text{C}$  NMR ( $\text{CDCl}_3$ ) of compound **3**

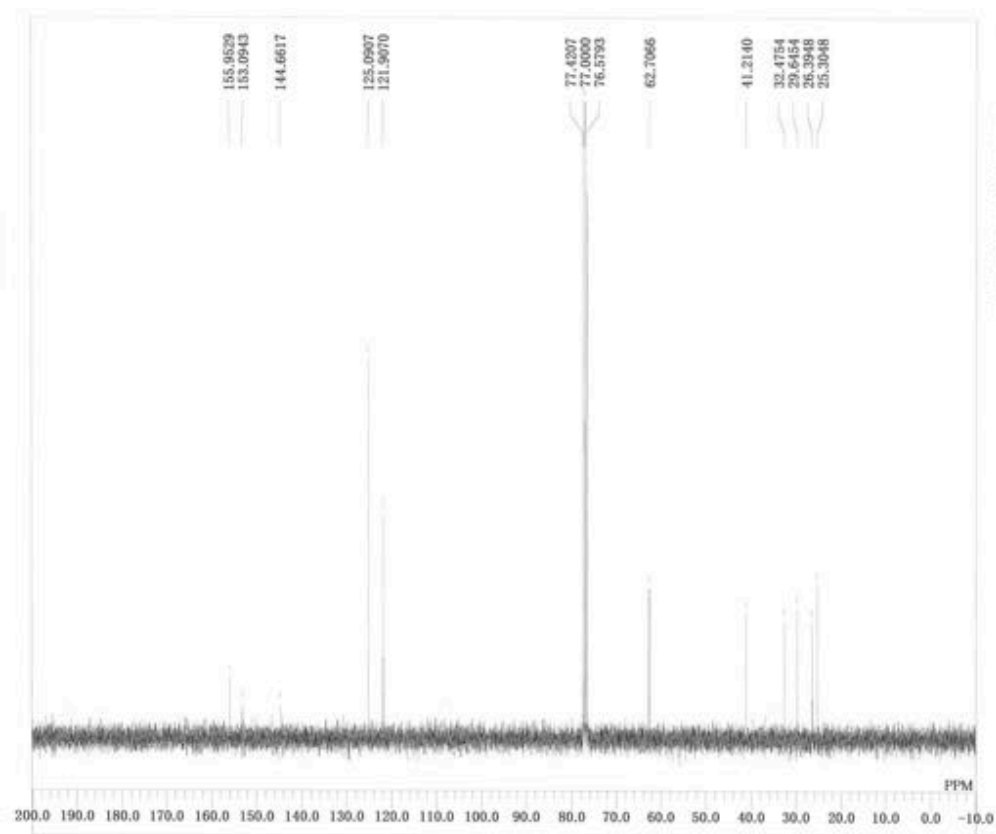

(c)  $^1\text{H}$  NMR ( $\text{CDCl}_3$ ) of compound **5**

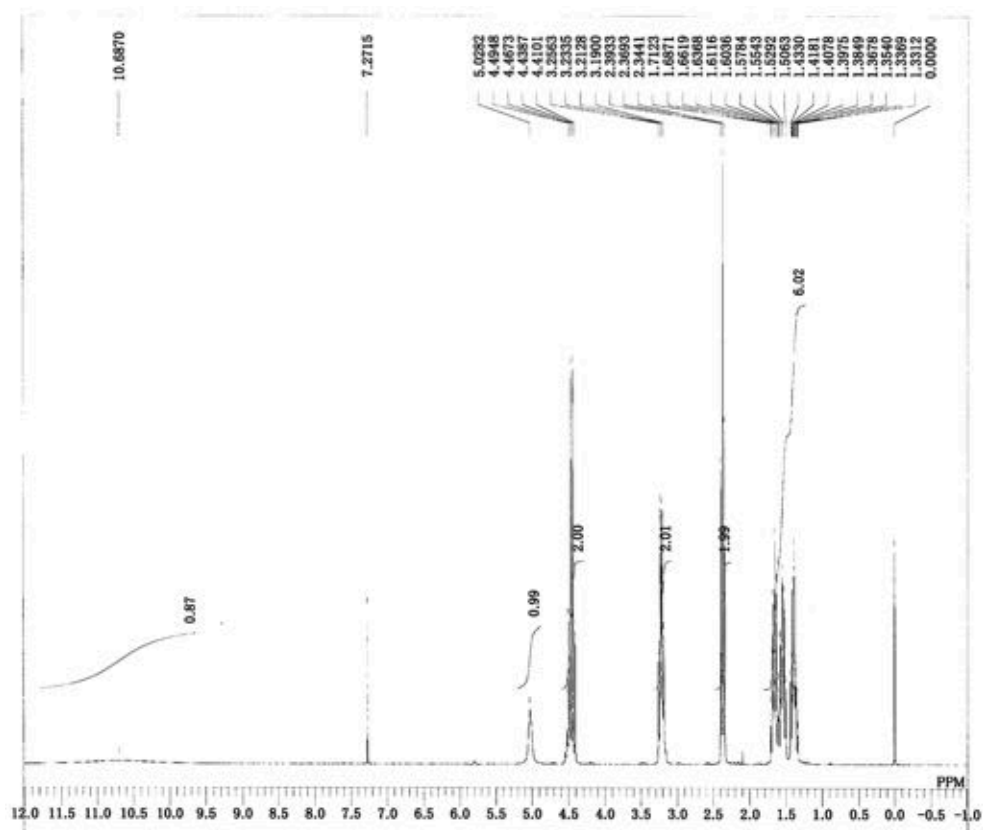

$^{13}\text{C}$  NMR ( $\text{CDCl}_3$ ) of compound **5**

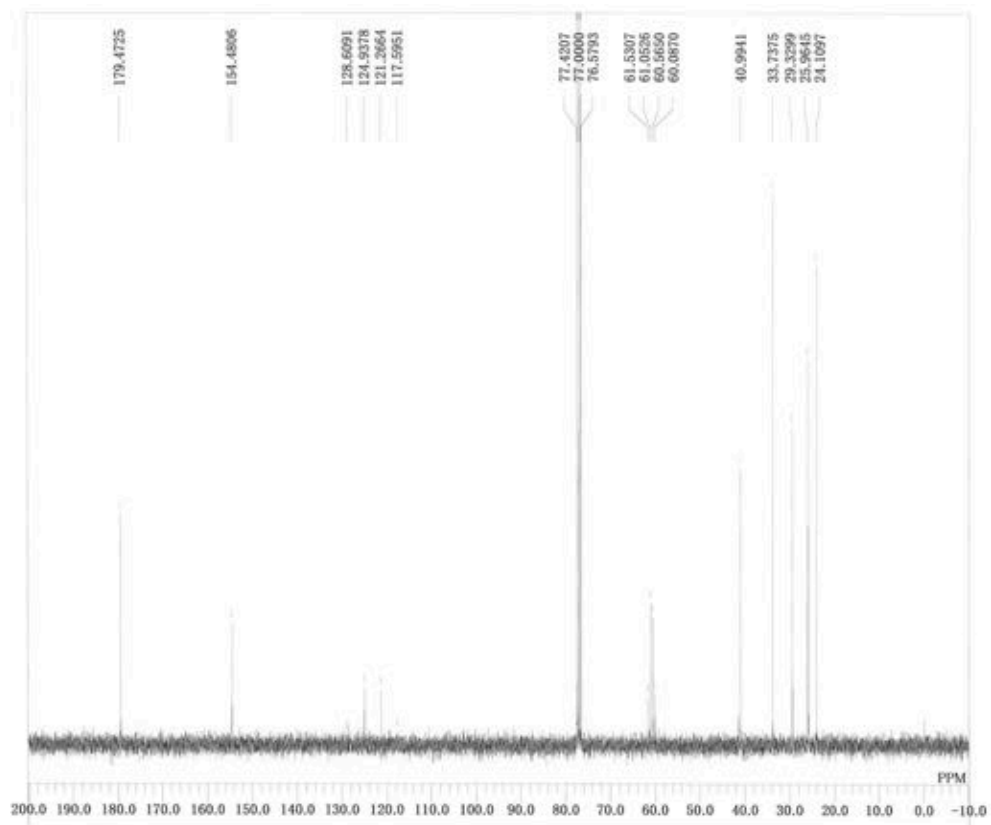

(d)  $^1\text{H}$  NMR ( $\text{CDCl}_3$ ) of compound 7

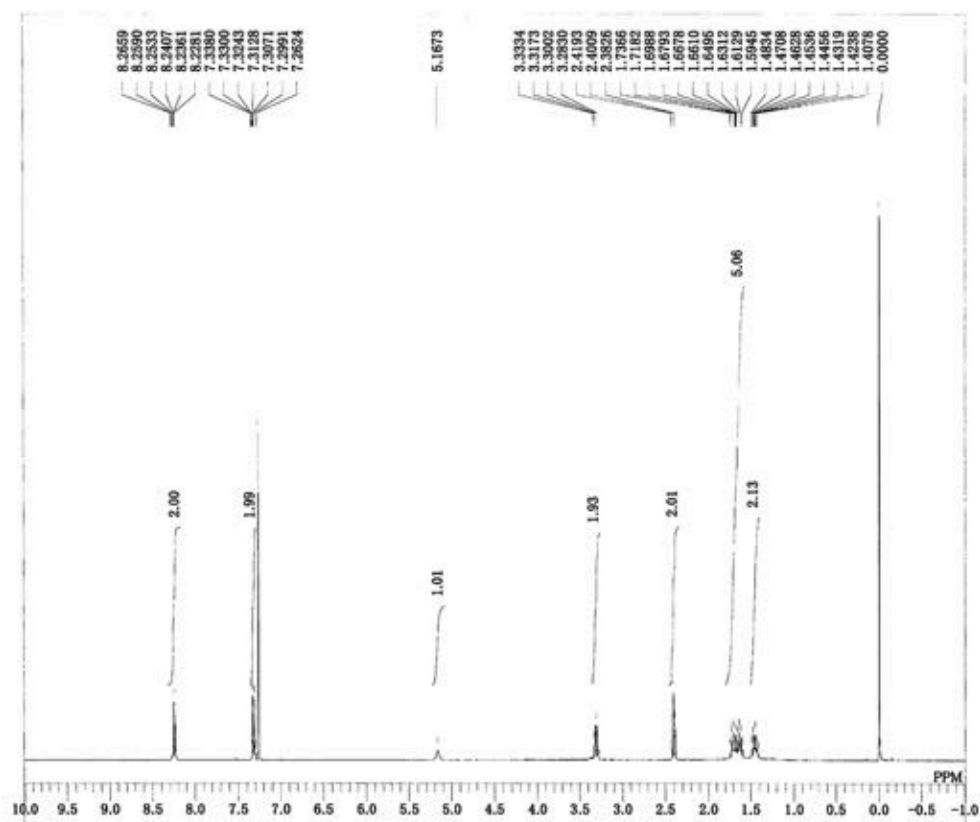

$^{13}\text{C}$  NMR ( $\text{CD}_3\text{OD}$ ) of compound 7

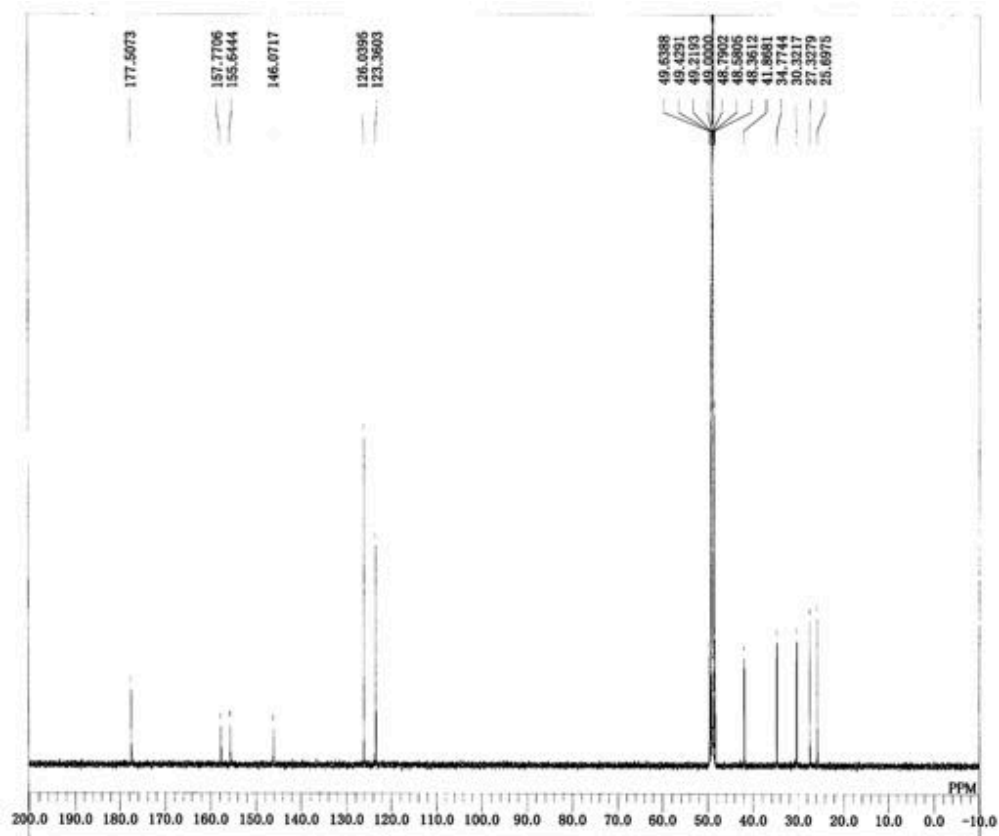

(e)  $^1\text{H}$  NMR ( $\text{CDCl}_3$ ) of compound **11**

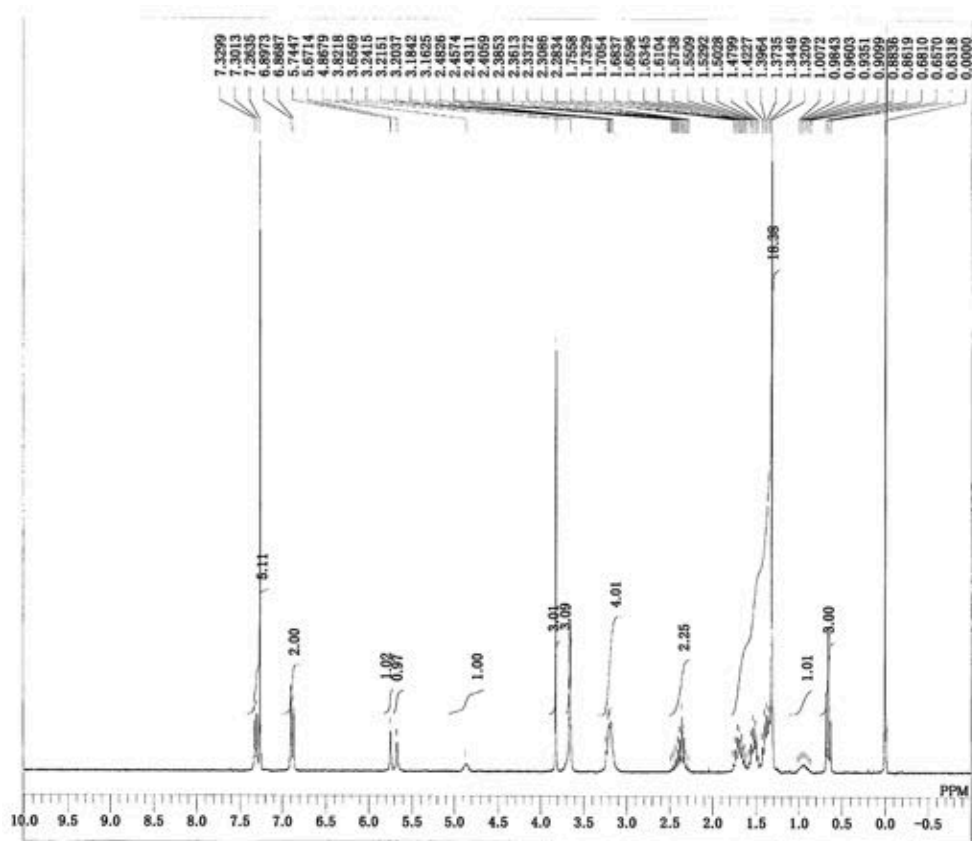

$^{13}\text{C}$  NMR ( $\text{CDCl}_3$ ) of compound **11**

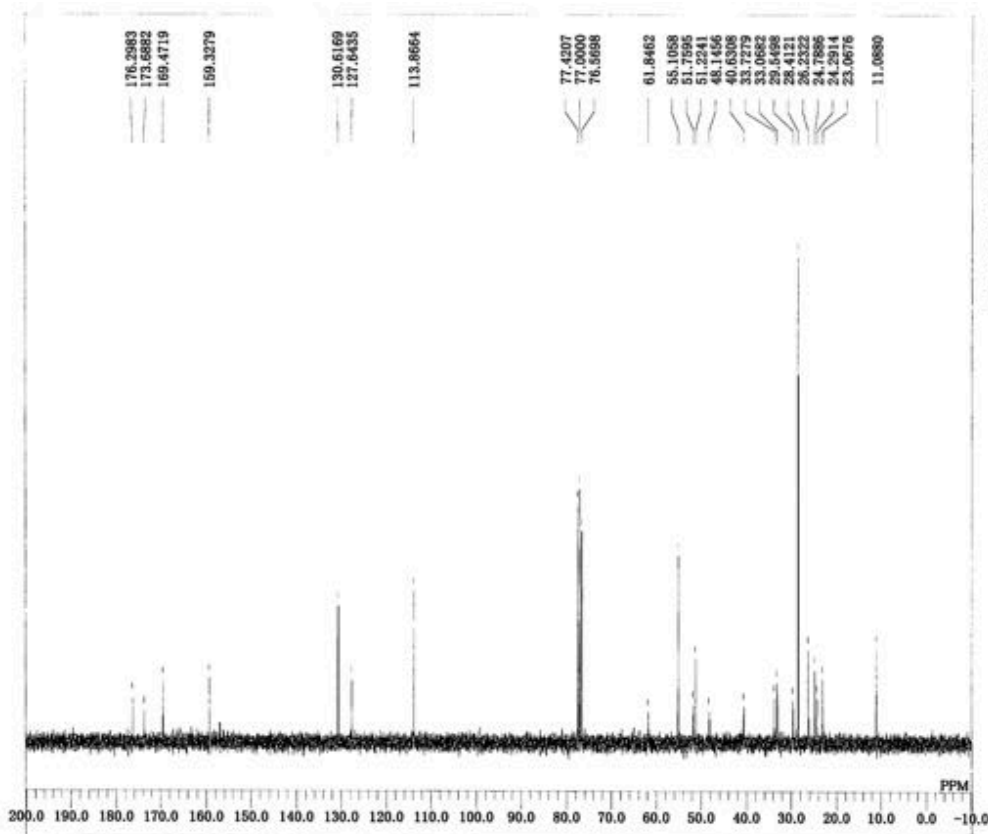

(f)  $^1\text{H}$  NMR ( $\text{CDCl}_3$ ) of compound **12**

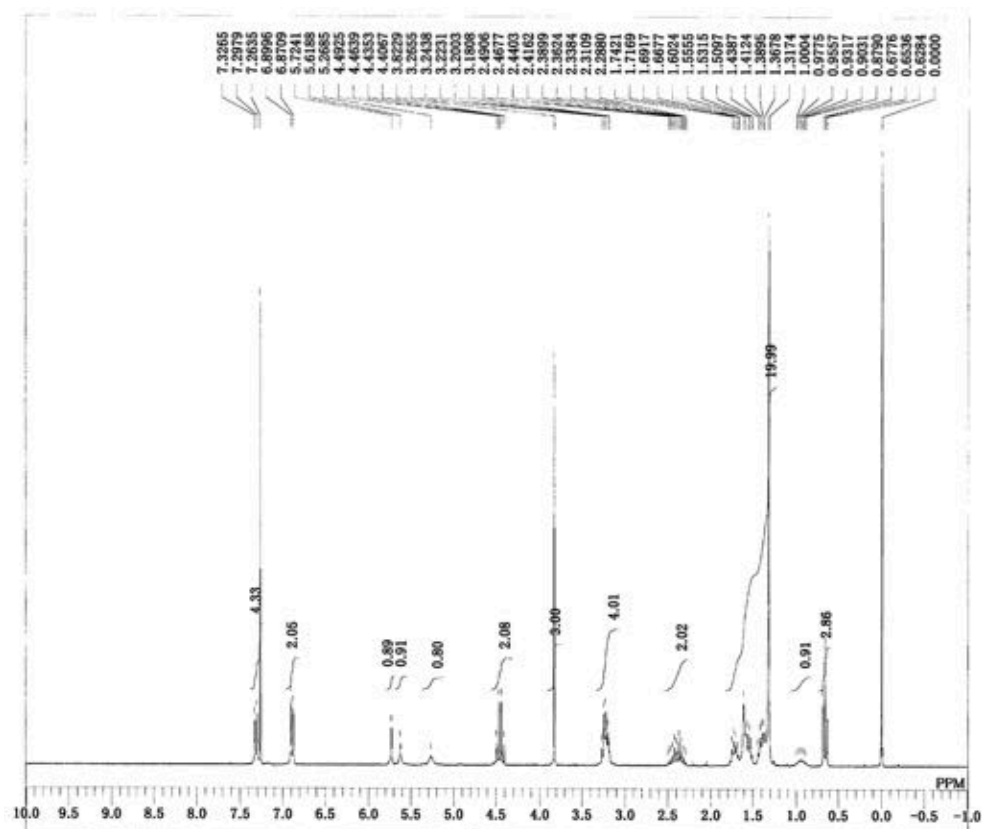

$^{13}\text{C}$  NMR ( $\text{CDCl}_3$ ) of compound **12**

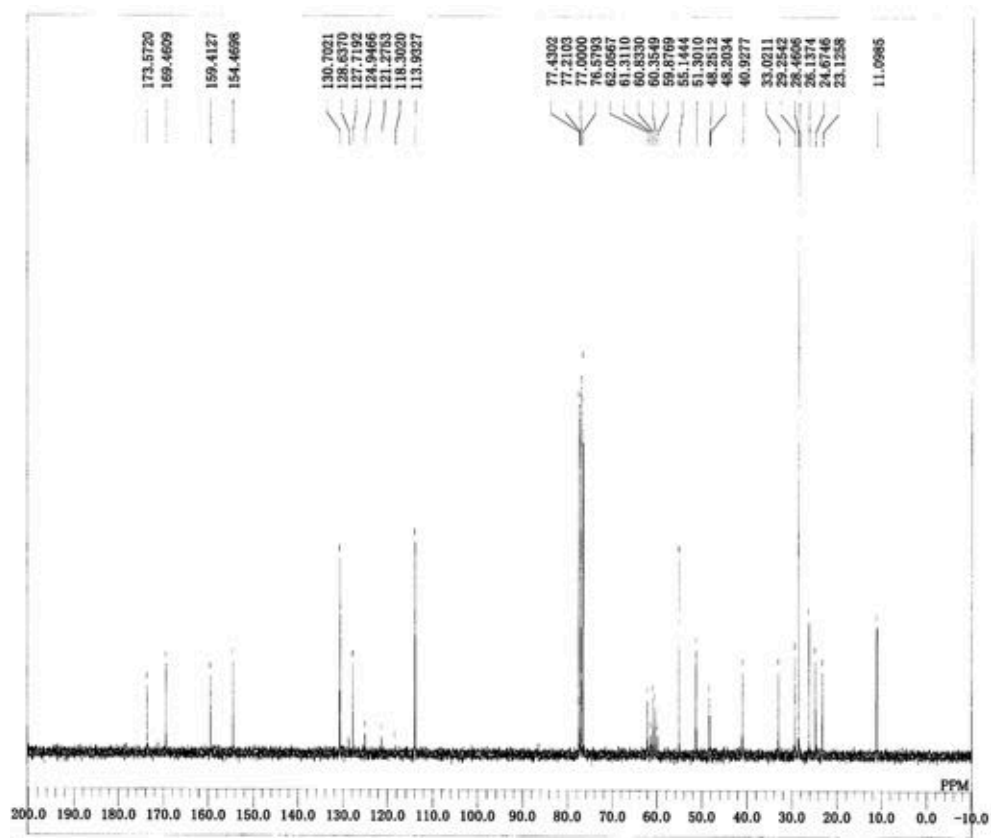

(g)  $^1\text{H}$  NMR ( $\text{CDCl}_3$ ) of compound **13**

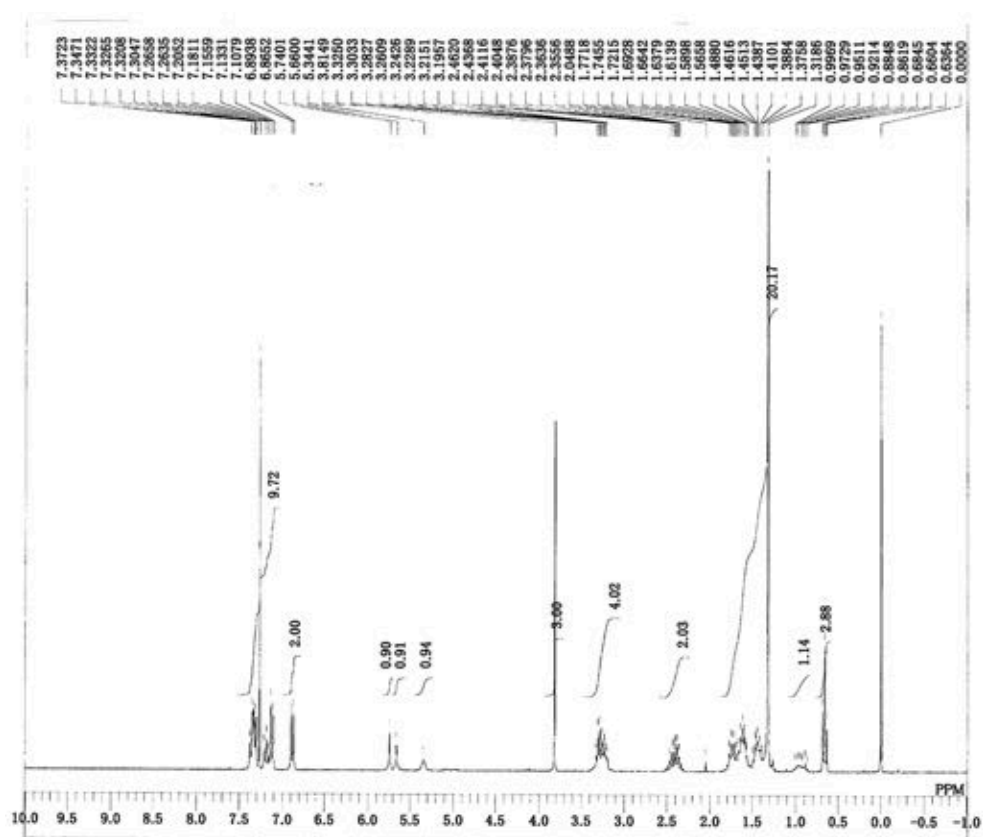

$^{13}\text{C}$  NMR ( $\text{CDCl}_3$ ) of compound **13**

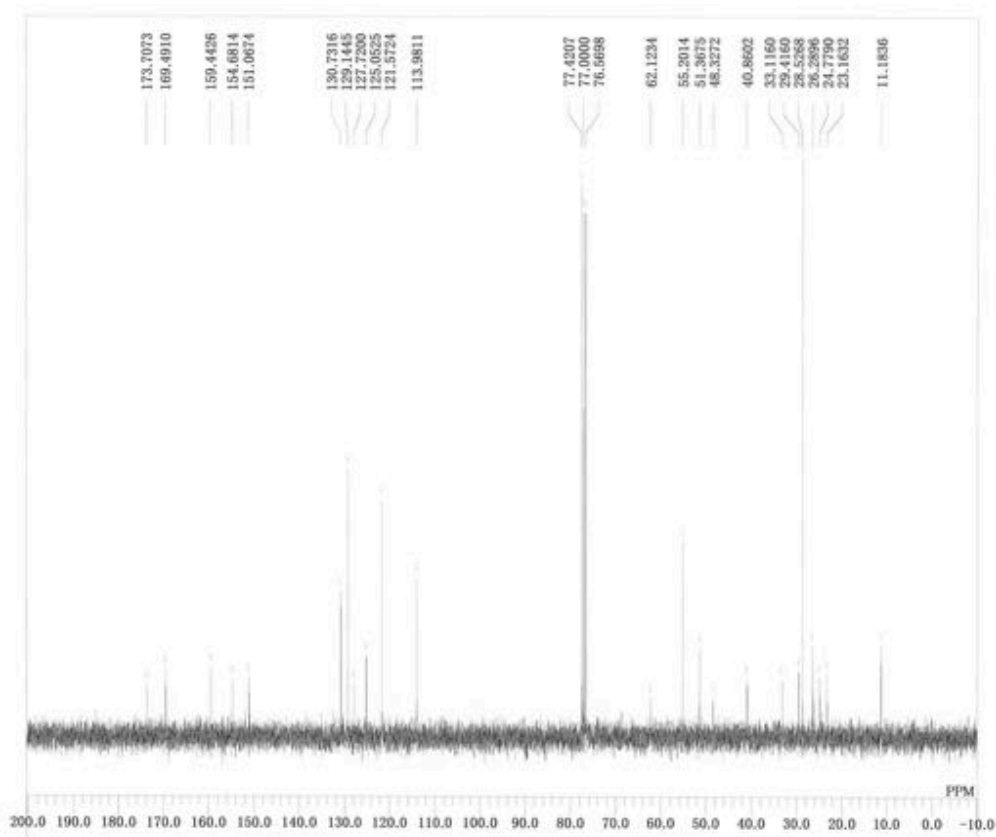



(h)  $^1\text{H}$  NMR ( $\text{CDCl}_3$ ) of compound **14**

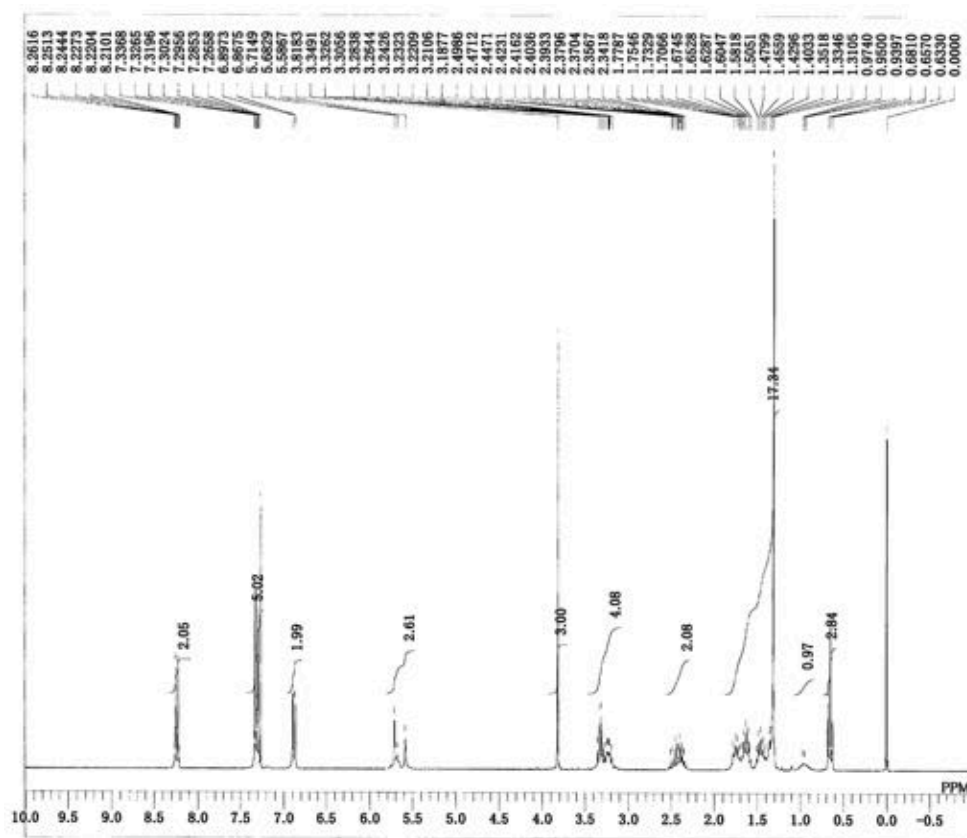

$^{13}\text{C}$  NMR ( $\text{CDCl}_3$ ) of compound **14**

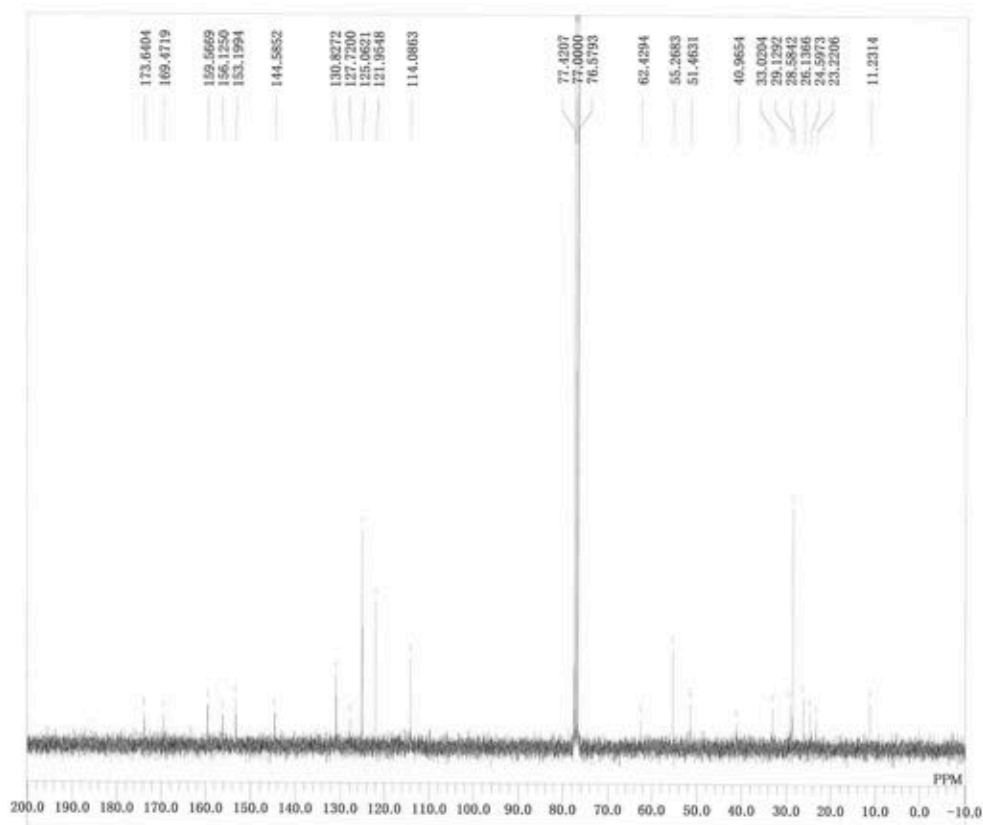

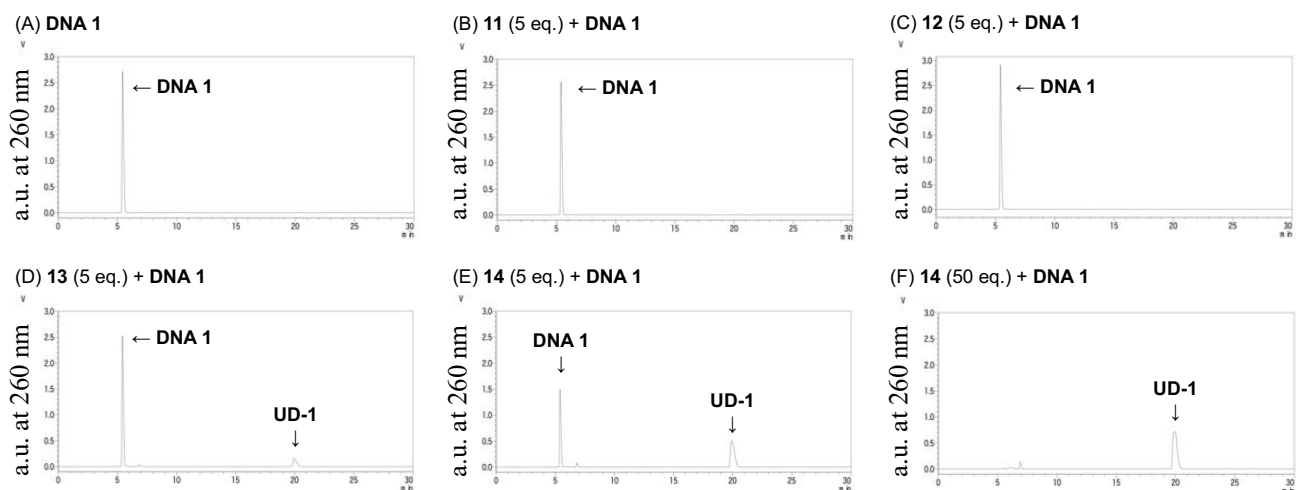

**Figure S2.** HPLC chromatograms after the conjugation reaction between peptoids 11–14 and DNA 1. The reaction mixtures were analyzed by RP-HPLC with a linear gradient of MeCN (from 7 to 40% over 30 min, 50 °C) in 0.1 M TEAA buffer (pH 7.0).

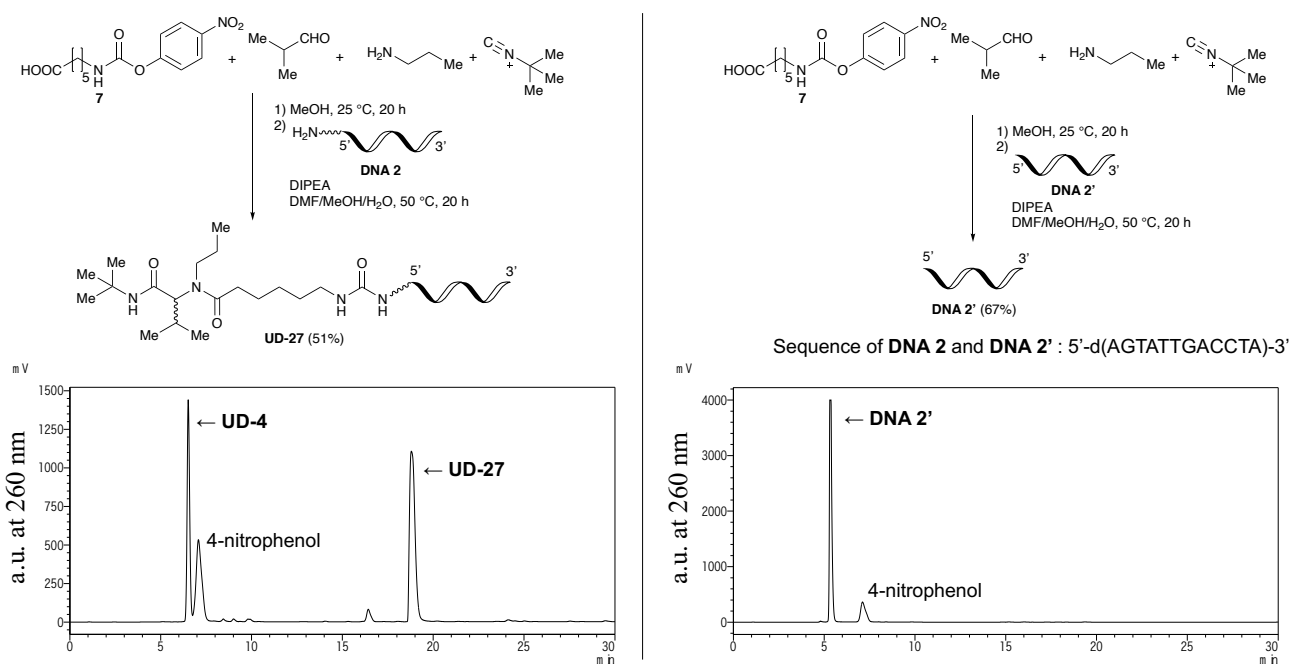

**Figure S3.** HPLC chromatograms after the conjugation reaction using DNA with or without an aminohexyl linker and the crude peptoid prepared by Ugi reaction. The reaction mixtures were analyzed by RP-HPLC with a linear gradient of MeCN (from 7 to 40% over 30 min, 50 °C) in 0.1 M TEAA buffer (pH 7.0).

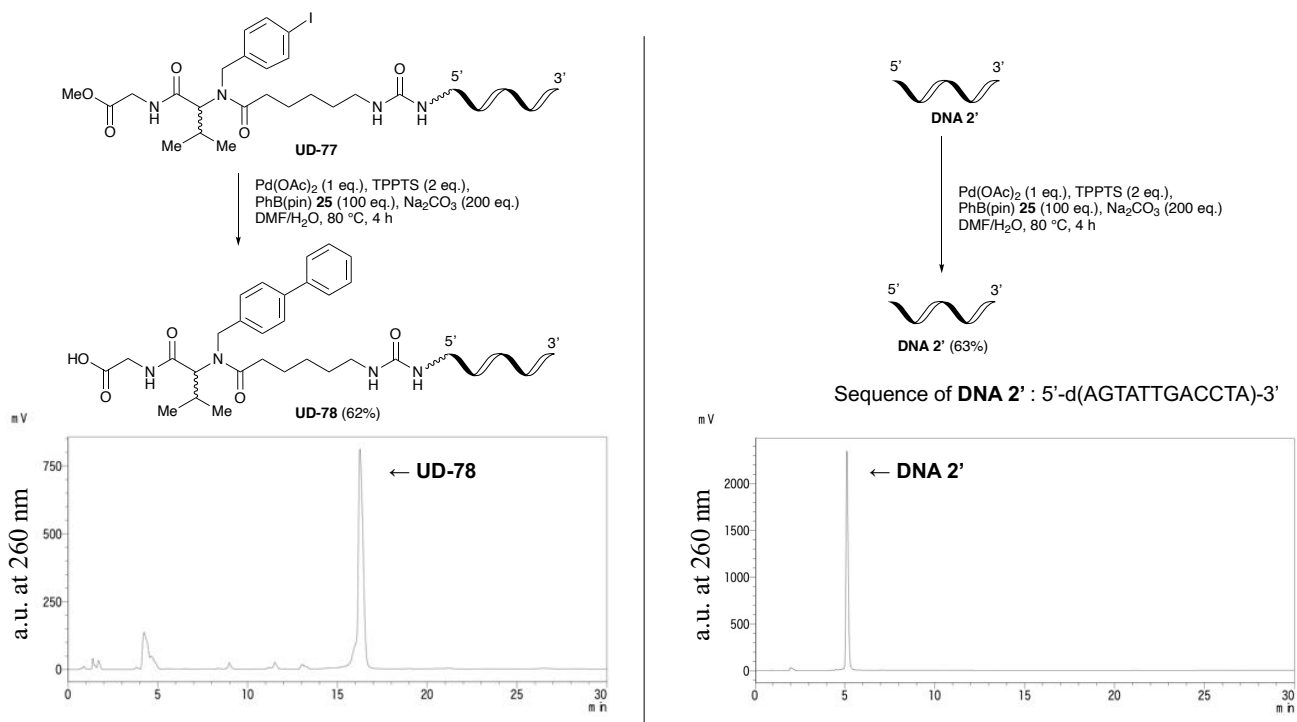

**Figure S4.** HPLC chromatograms after Suzuki-coupling. The reaction mixtures were analyzed by RP-HPLC with a linear gradient of MeCN (from 7 to 40% over 30 min, 50 °C) in 0.1 M TEAA buffer (pH 7.0).

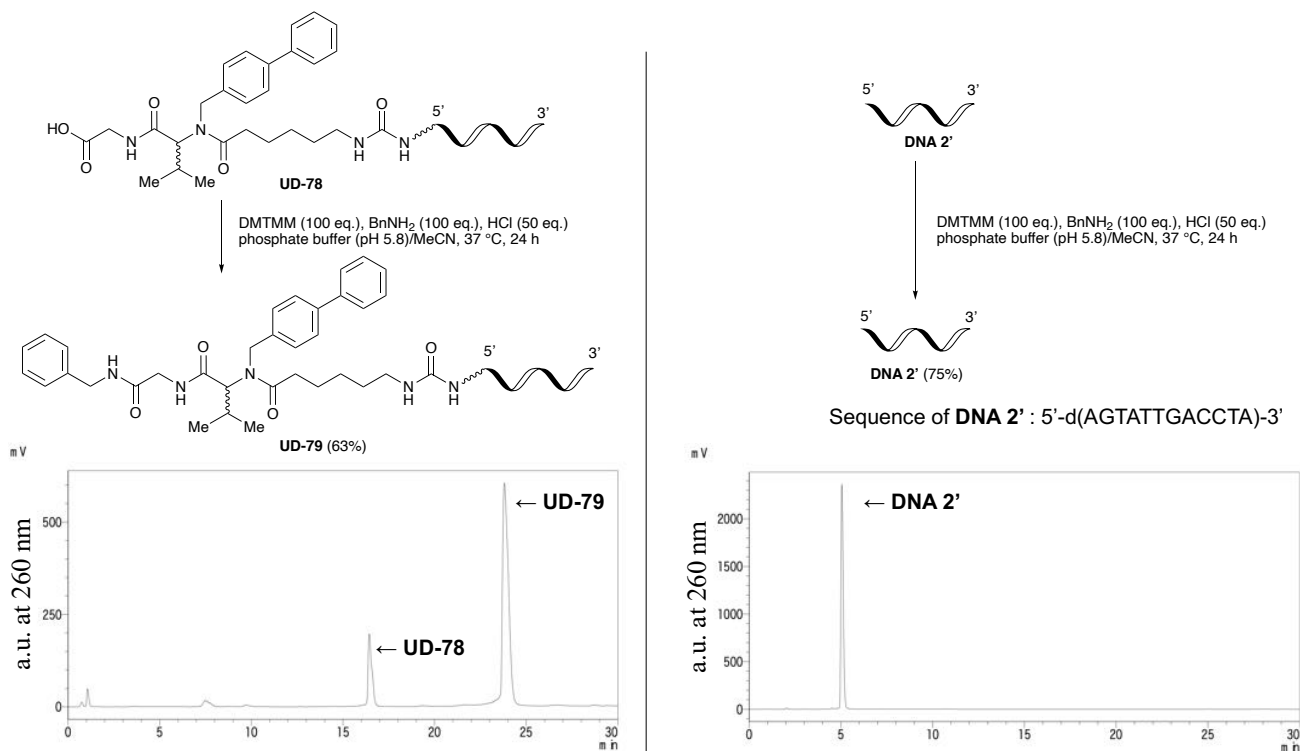

**Figure S5.** HPLC chromatograms after the amide bond formation reaction. The reaction mixtures were analyzed by RP-HPLC with a linear gradient of MeCN (from 7 to 40% over 30 min, 50 °C) in 0.1 M TEAA buffer (pH 7.0).

**Figure S6.** HPLC charts and MALDI-TOF mass spectrometry data of each peptoid-conjugated oligonucleotides  
HPLC conditions: Detection: UV 260 nm, flow rate: 1.0 mL/min, mobile phase A: 0.1 M TEAA (pH 7.0), mobile phase B: acetonitrile (MeCN), column: Waters XBridge™ Shield RP18 2.5 μm (4.6×50 mm), temperature: 50 °C

### UD-1

[B conc. MeCN: 7-40% (30 min)]

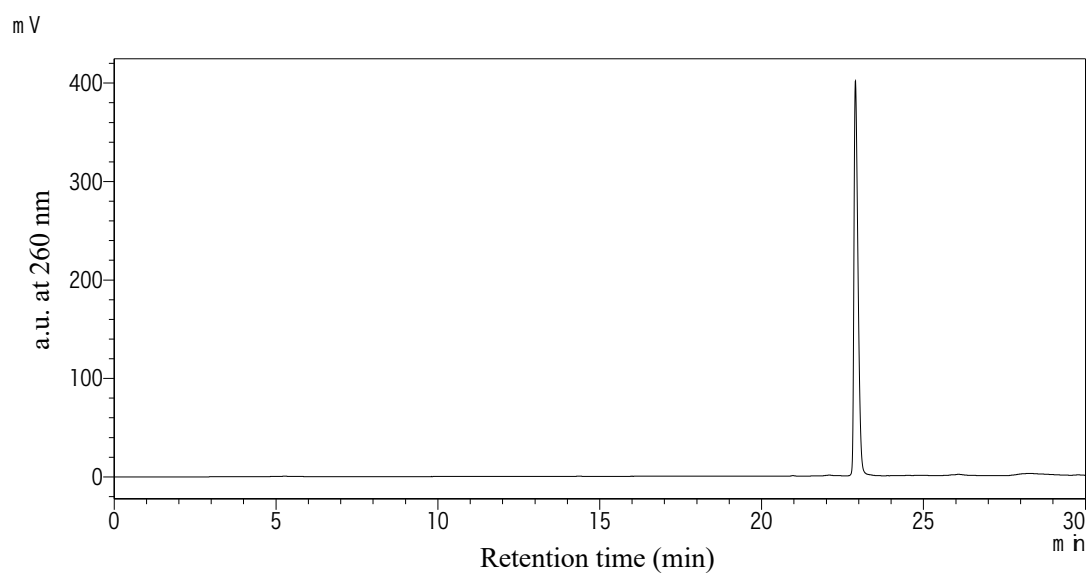

[calcd. (M-H)<sup>-</sup>: 3575.7, found: 3578.9]

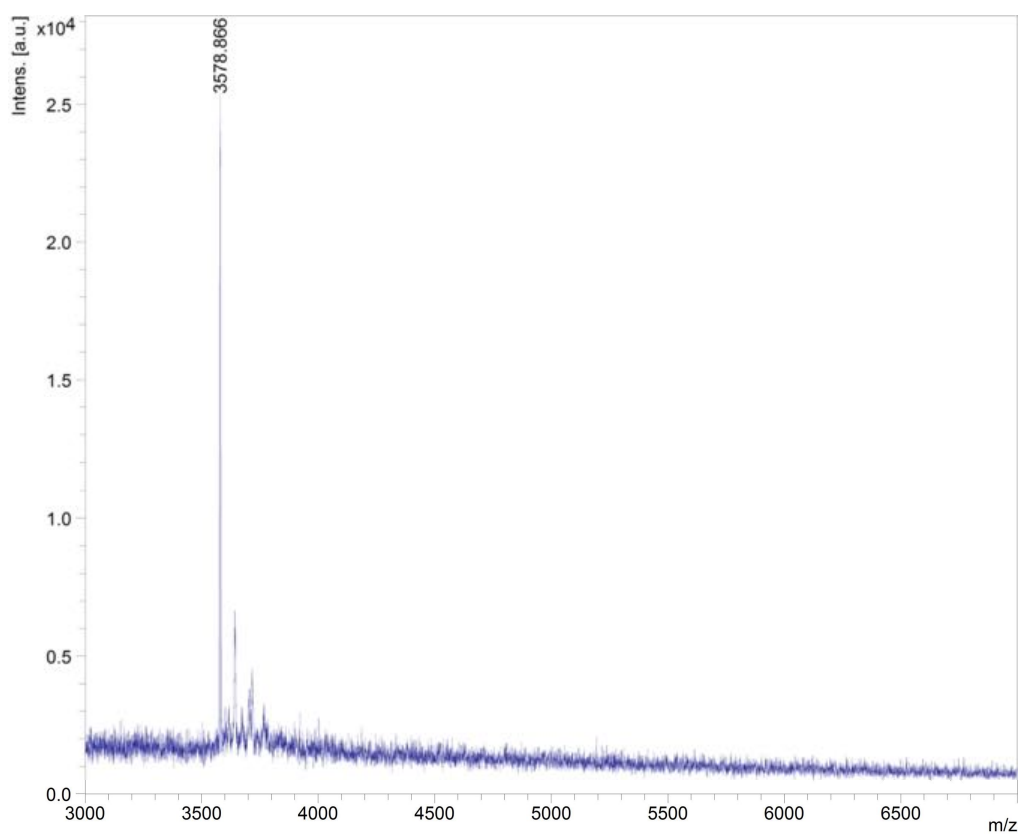

## UD-2

[B conc. MeCN: 7-40% (30 min)]

mV

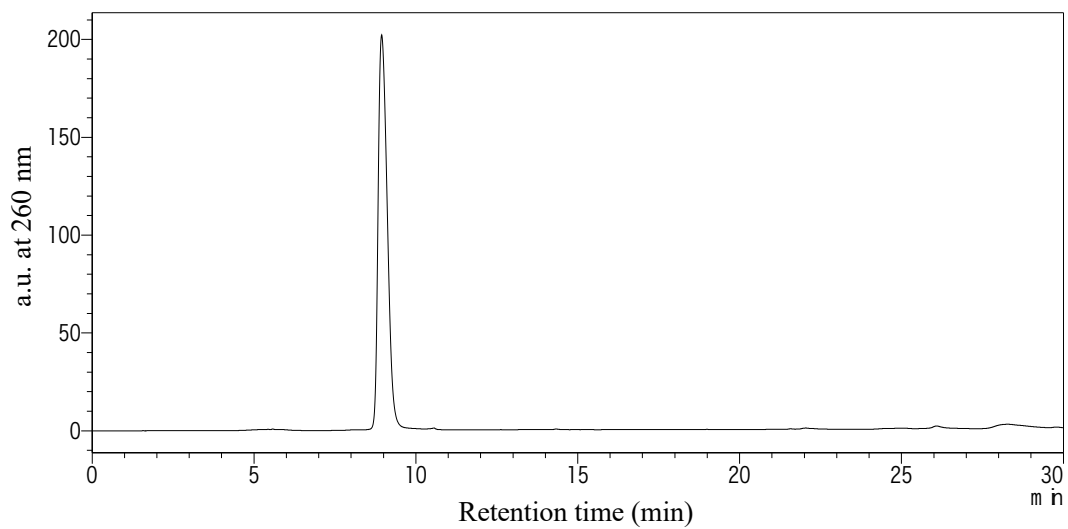

[calcd. (M-H)<sup>-</sup>: 3315.3, found: 3314.4]

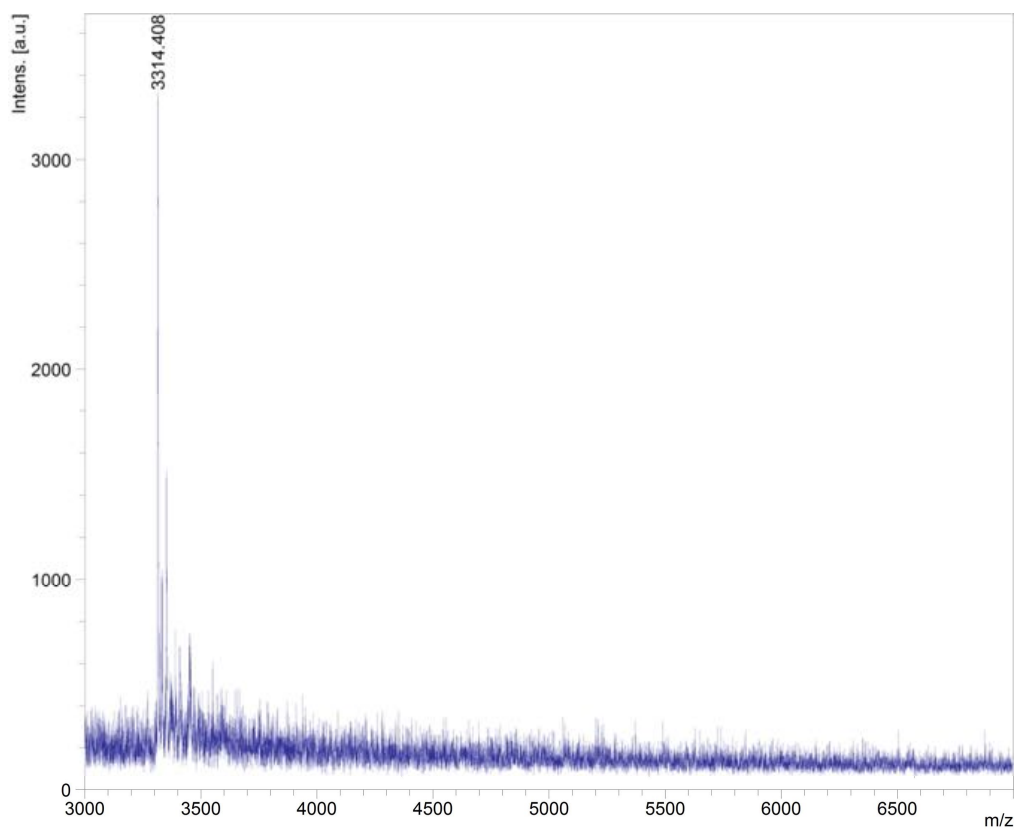

### UD-3

[B conc. MeCN: 7-40% (30 min)]

mV

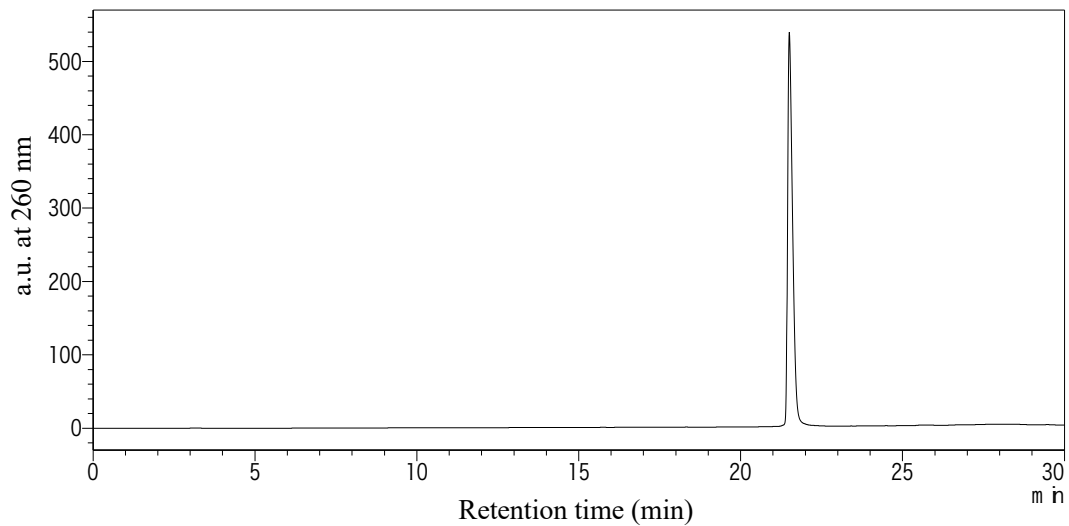

[calcd. (M-H)<sup>-</sup>: 4240.1, found: 4239.8]

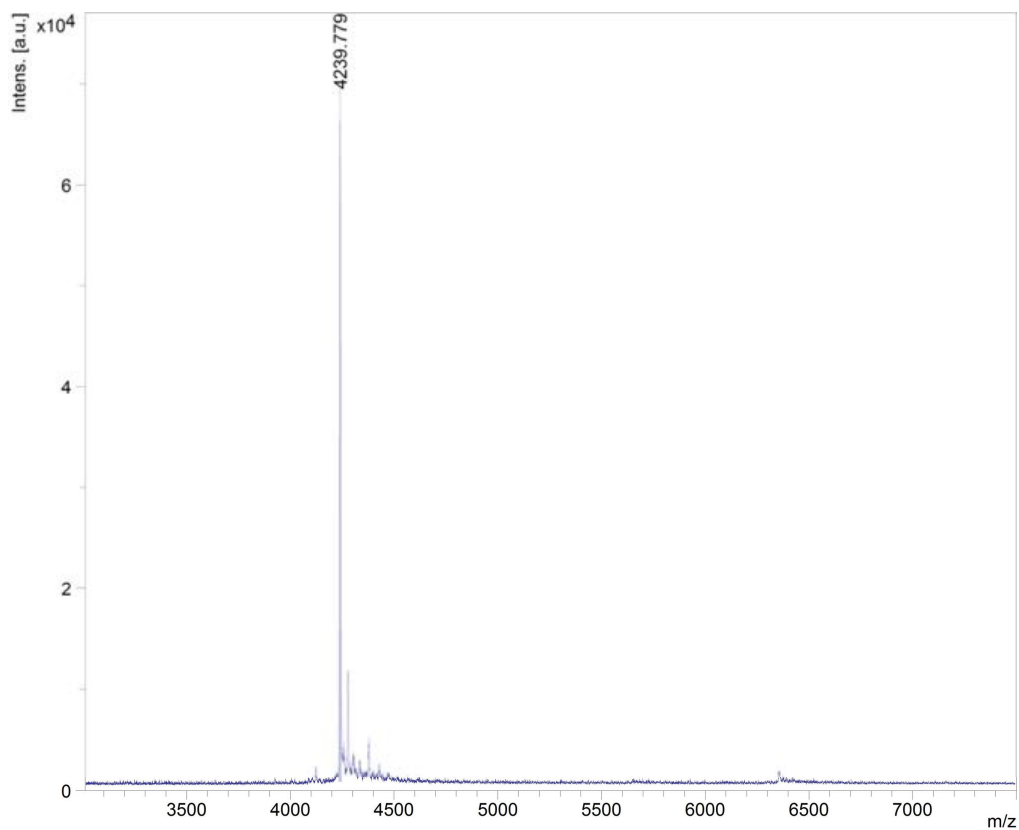

## UD-4

[B conc. MeCN: 7-40% (30 min)]

mV

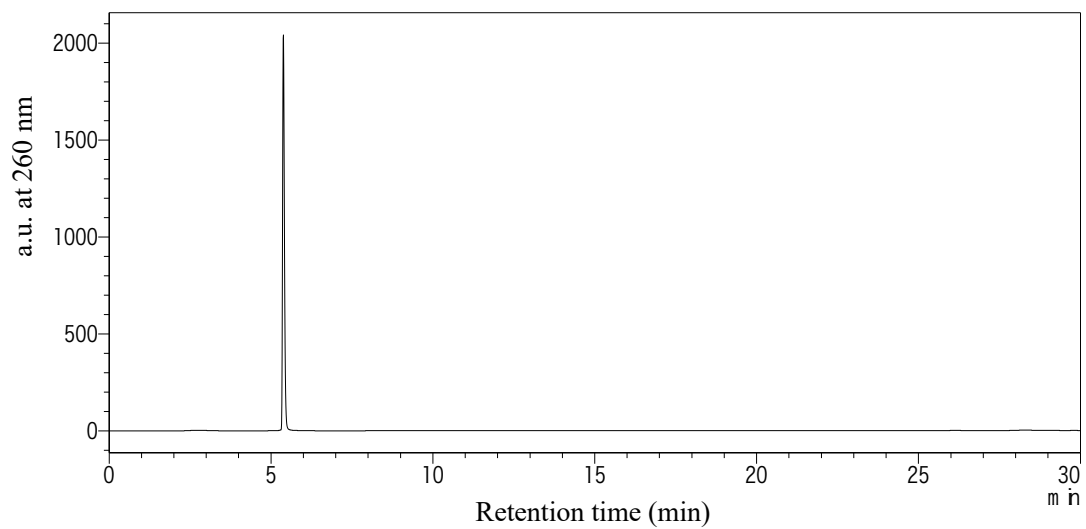

[calcd. (M-H)<sup>-</sup>: 3979.8, found: 3979.5]

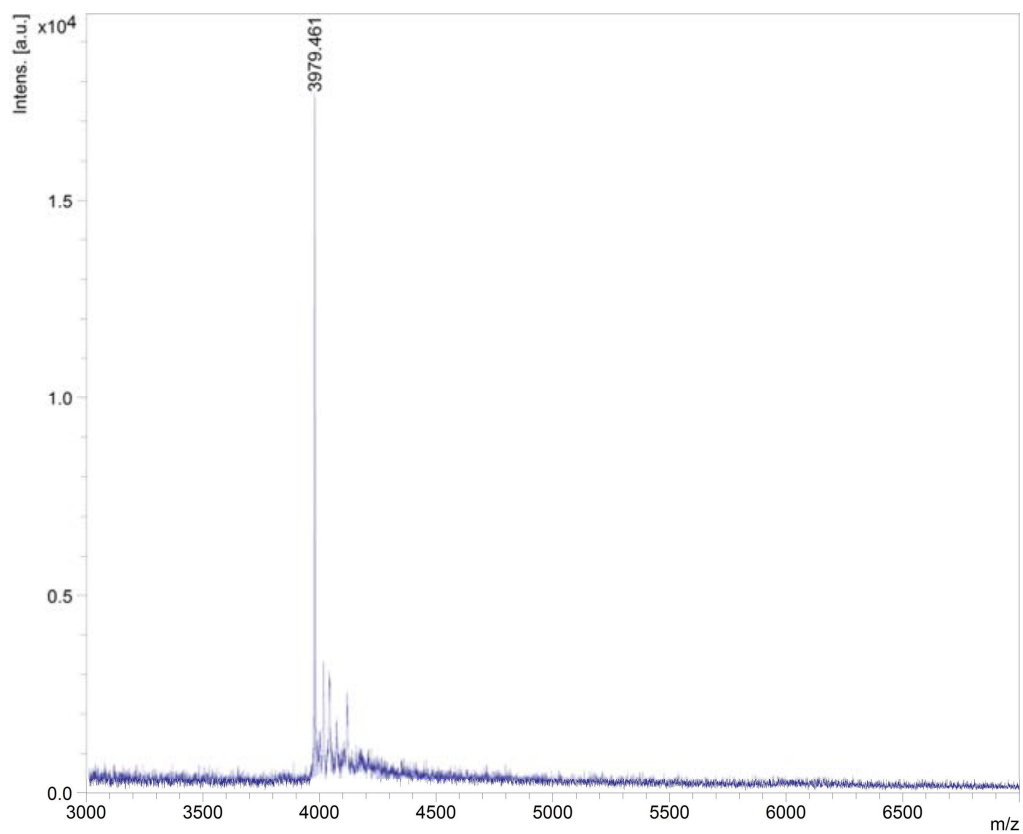

## UD-5

[B conc. MeCN: 7-40% (30 min)]

mV

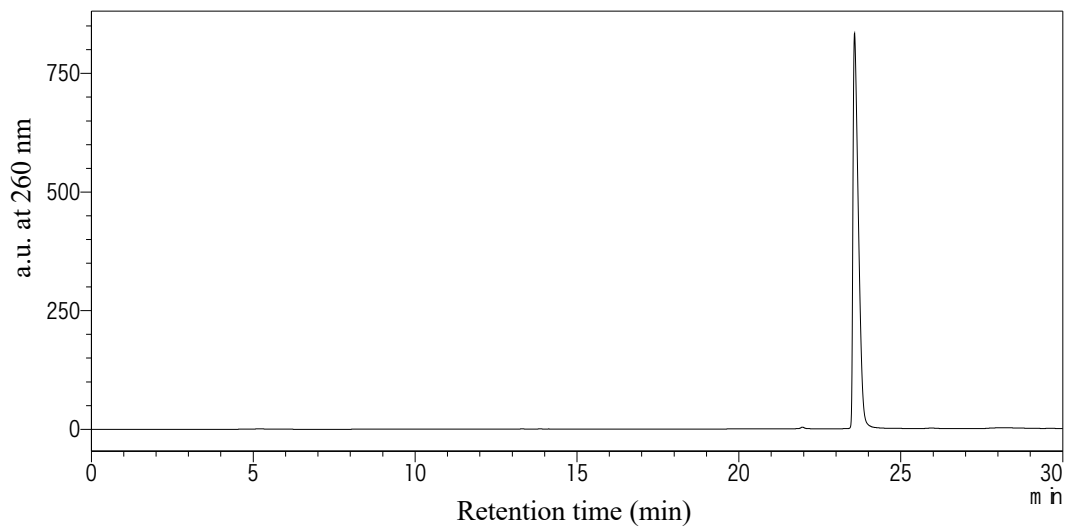

[calcd. (M-H)<sup>-</sup>: 4288.2, found: 4289.1]

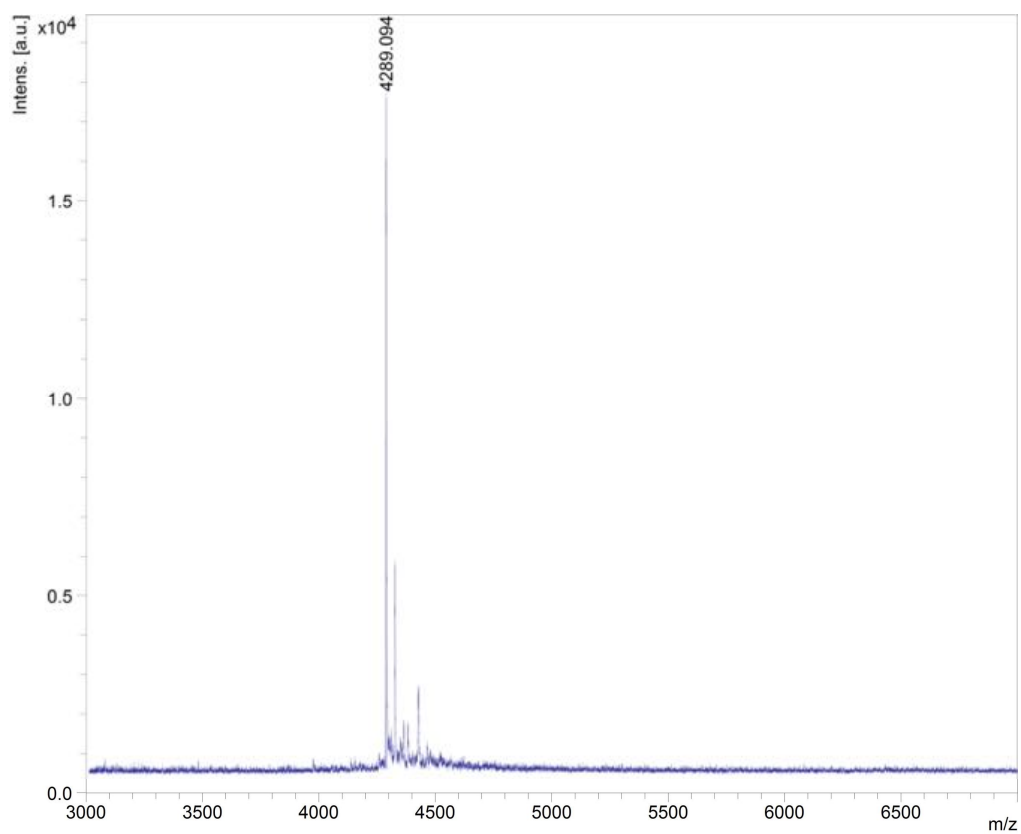



## UD-6

[B conc. MeCN: 7-40% (30 min)]

mV

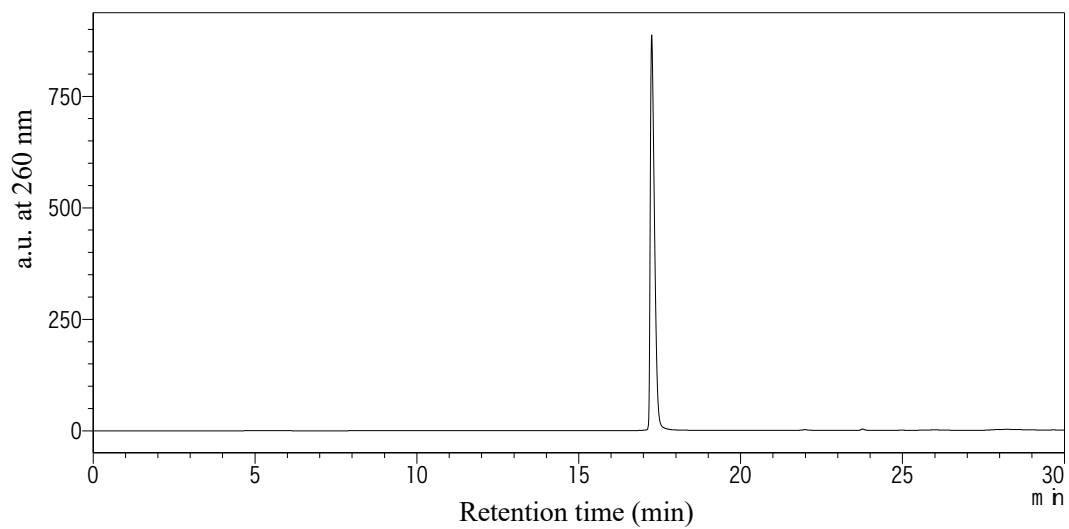

[calcd. (M-H)<sup>-</sup>: 4256.1, found: 4256.6]

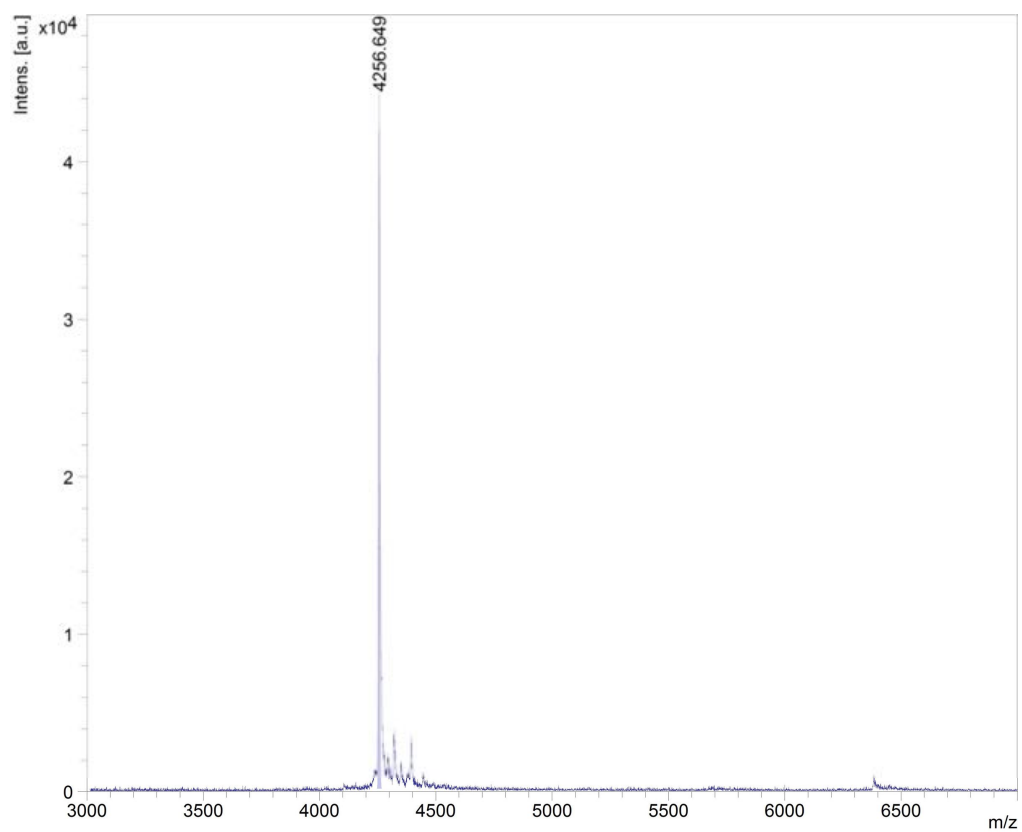

**UD-7**

[B conc. MeCN: 7-40% (30 min)]

mV

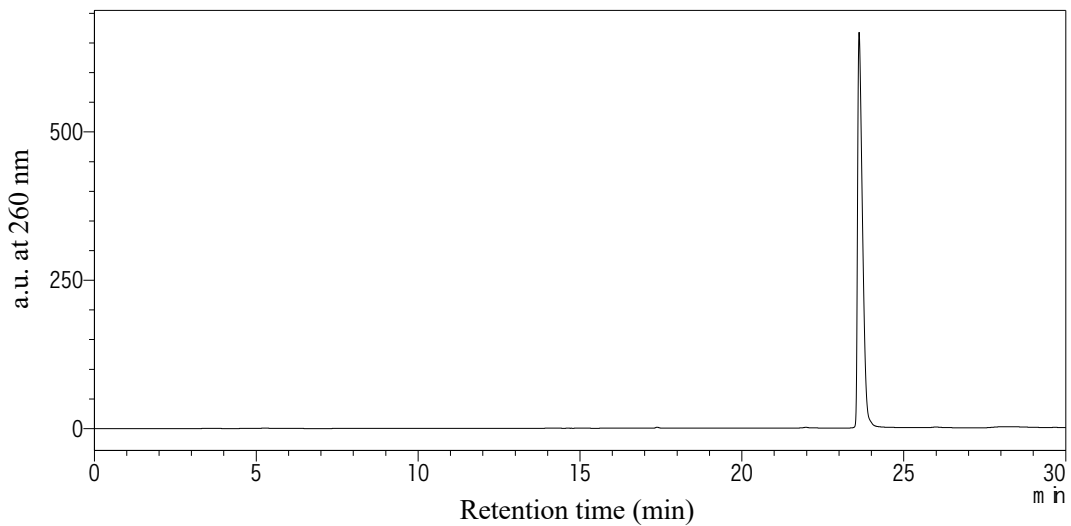

[calcd. (M-H)<sup>-</sup>: 4266.2, found: 4267.5]

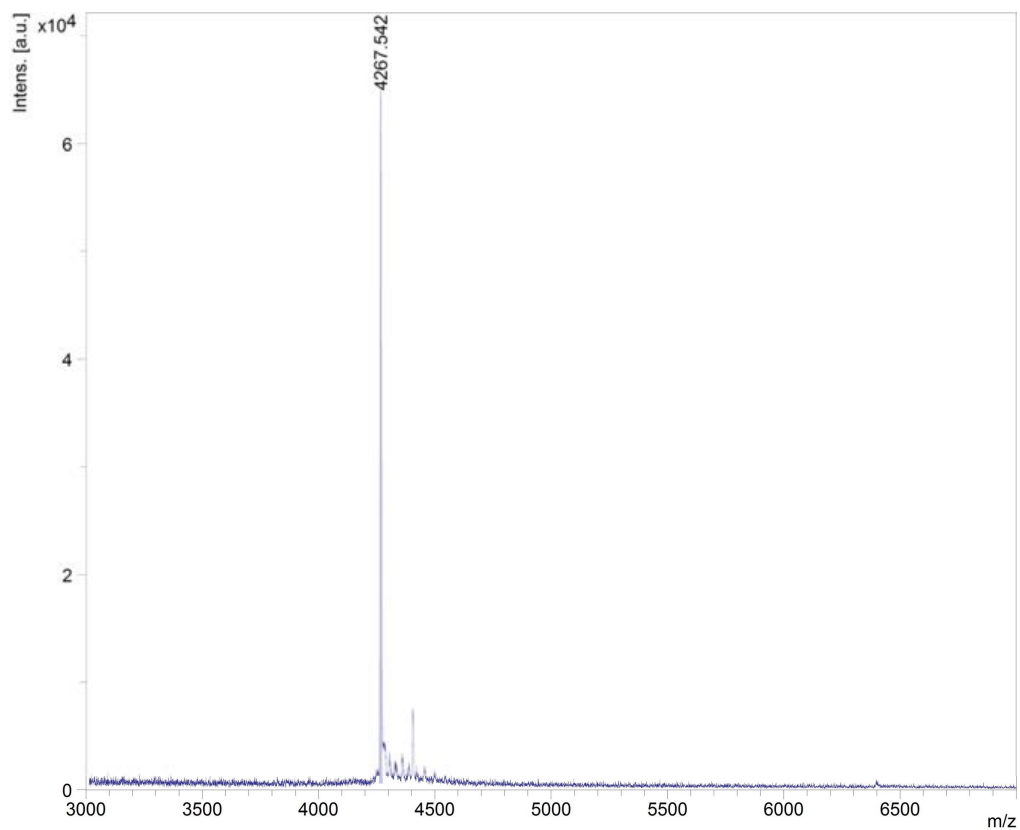

## UD-8

[B conc. MeCN: 7-40% (30 min)]

mV

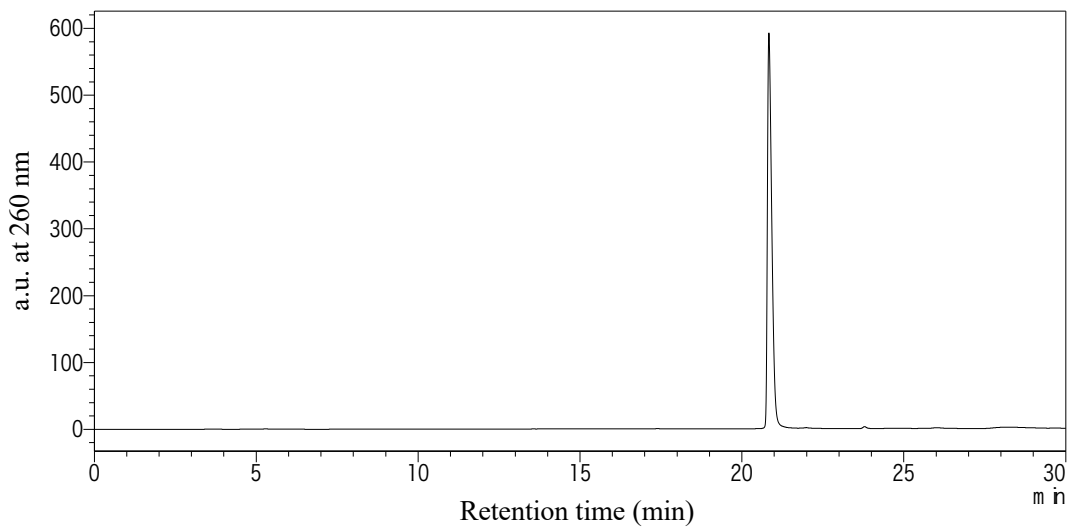

[calcd. (M-H)<sup>-</sup>: 4240.1, found: 4241.4]

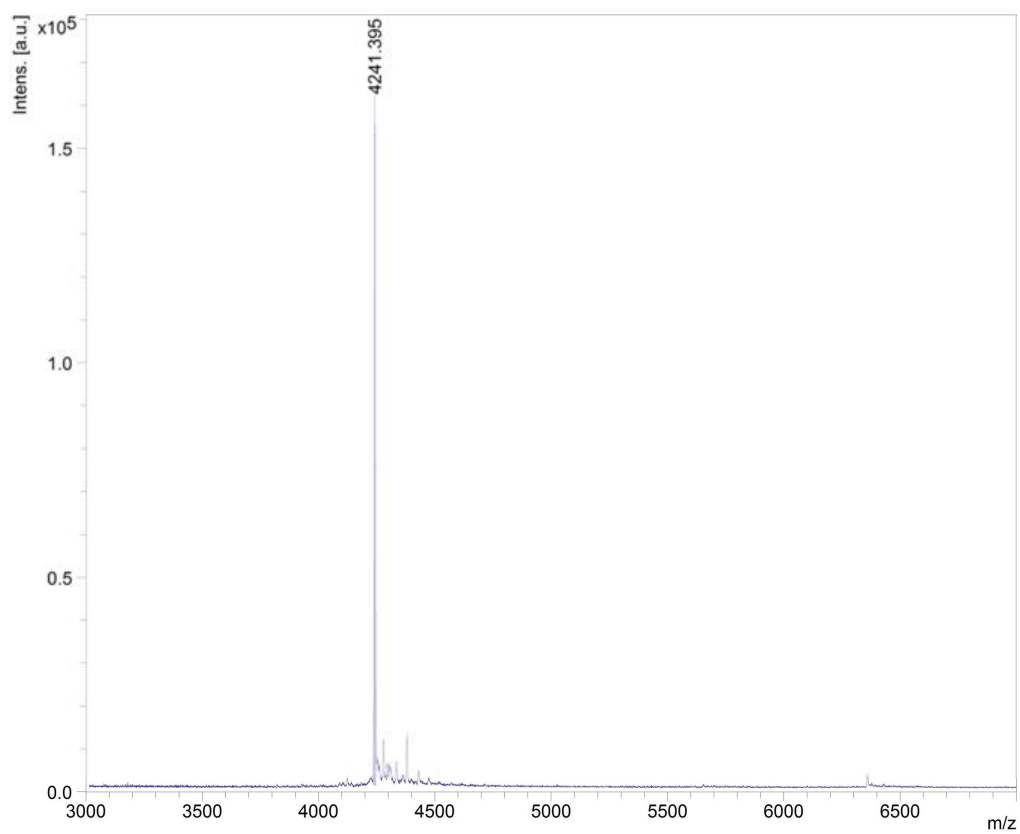

# UD-9

[B conc. MeCN: 7-40% (30 min)]

mV

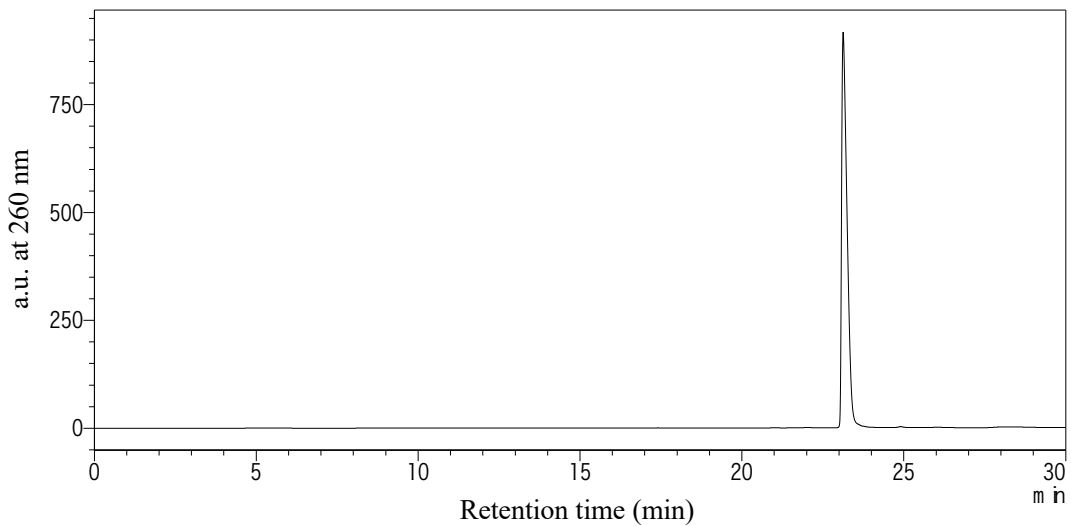

[calcd. (M-H)<sup>-</sup>: 4274.2, found: 4274.8]

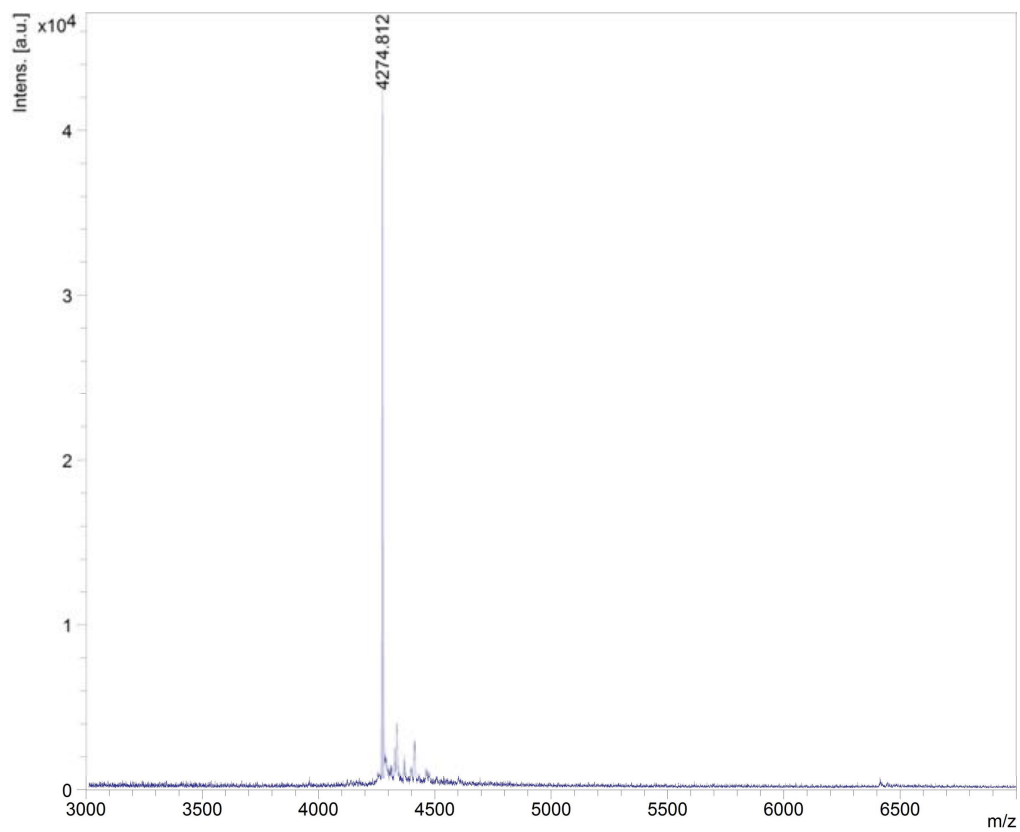

## UD-10

[B conc. MeCN: 7-40% (30 min)]

mV

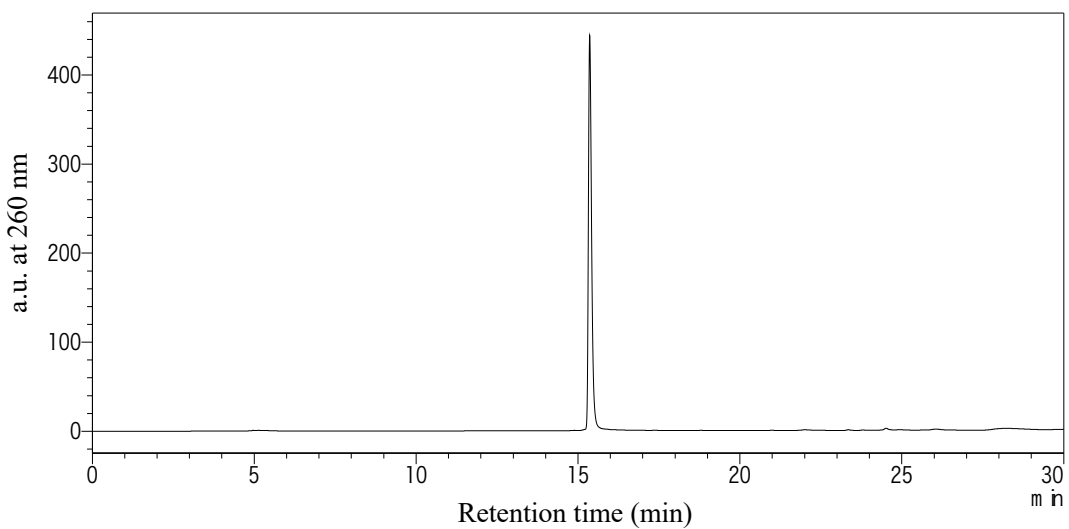

[calcd. (M-H)<sup>-</sup>: 4283.2, found: 4284.4]

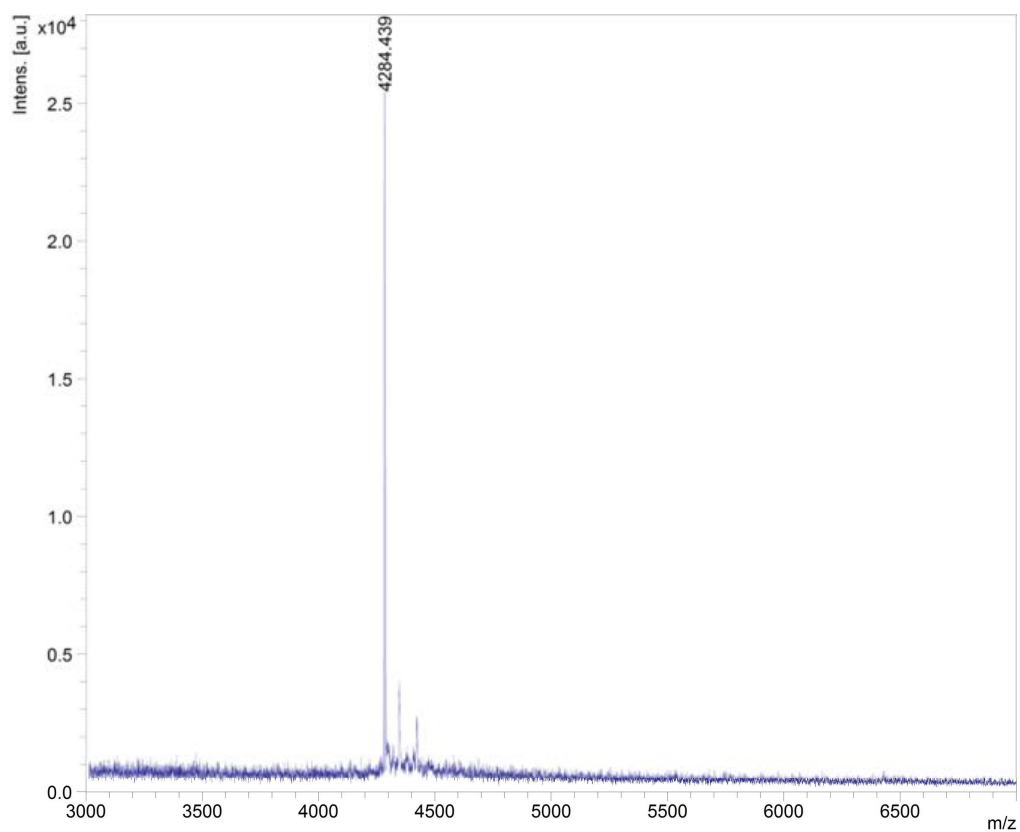

# UD-11

[B conc. MeCN: 7-40% (30 min)]

mV

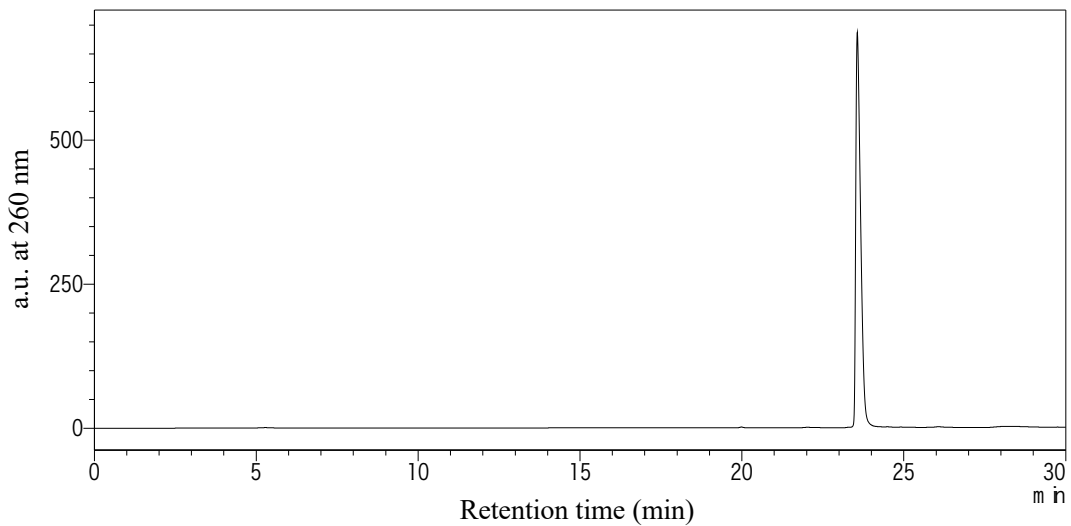

[calcd. (M-H)<sup>-</sup>: 4266.2, found: 4265.9]

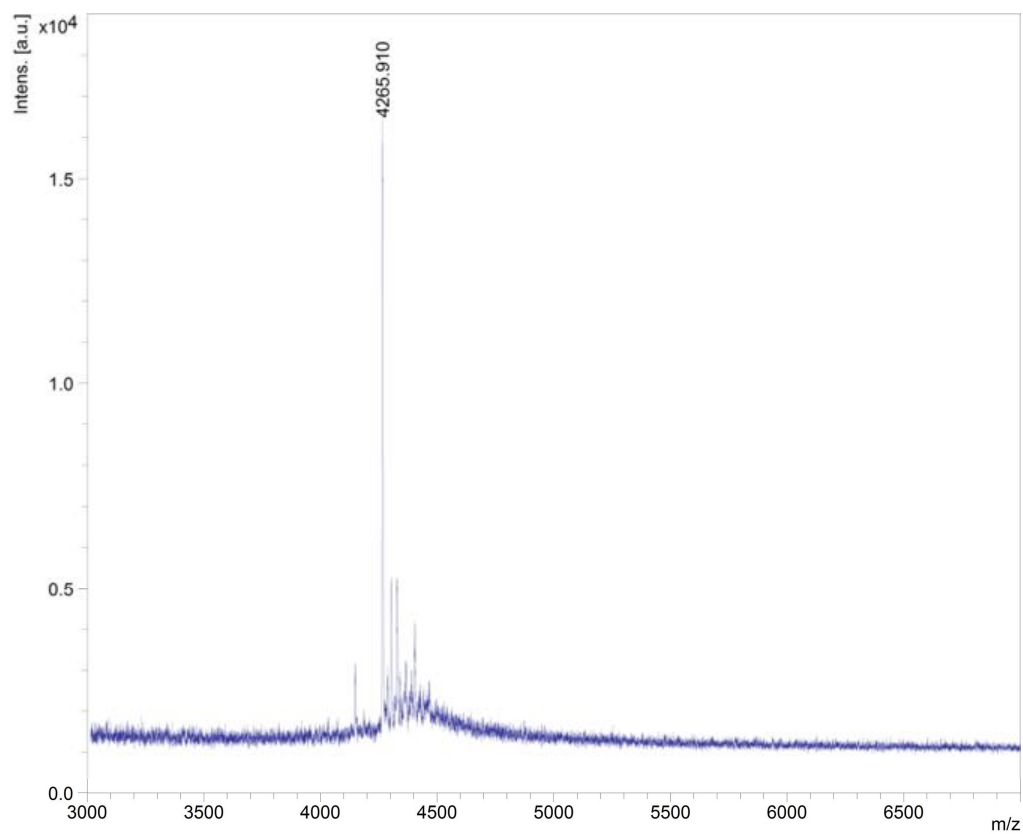

## UD-12

[B conc. MeCN: 7-40% (30 min)]

mV

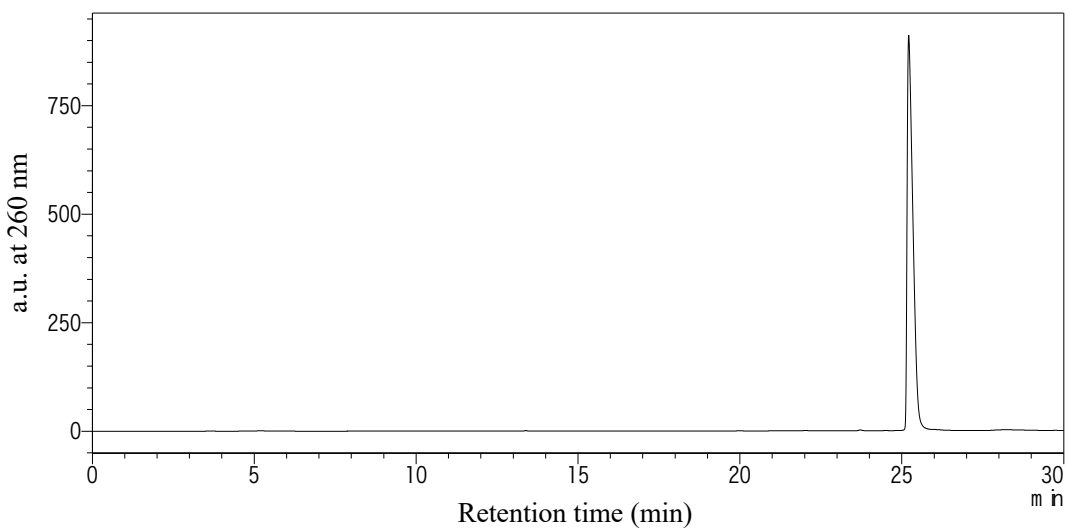

[calcd. (M-H)<sup>-</sup>: 4314.2, found: 4314.2]

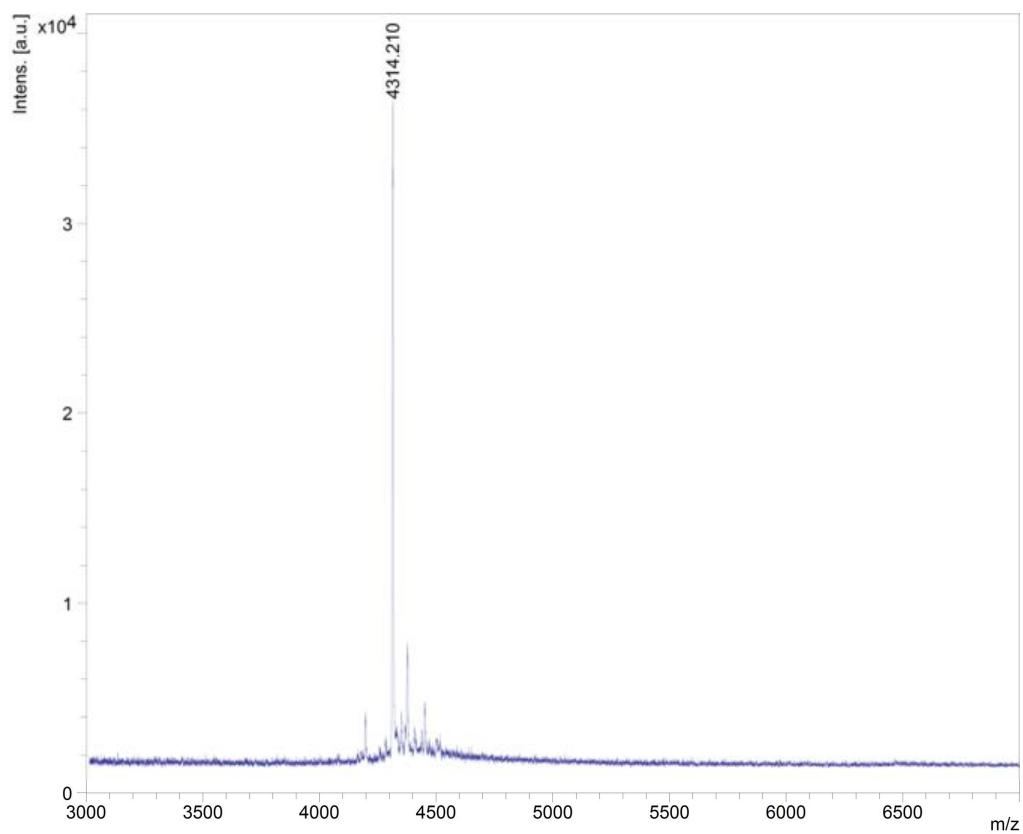

# UD-13

[B conc. MeCN: 7-40% (30 min)]

mV

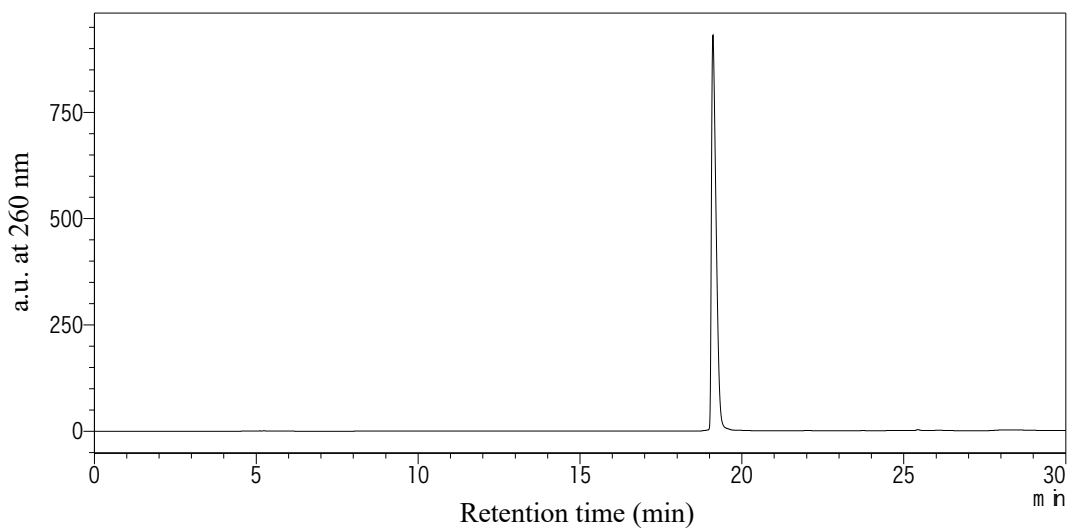

[calcd. (M-H)<sup>-</sup>: 4282.2, found: 4282.7]

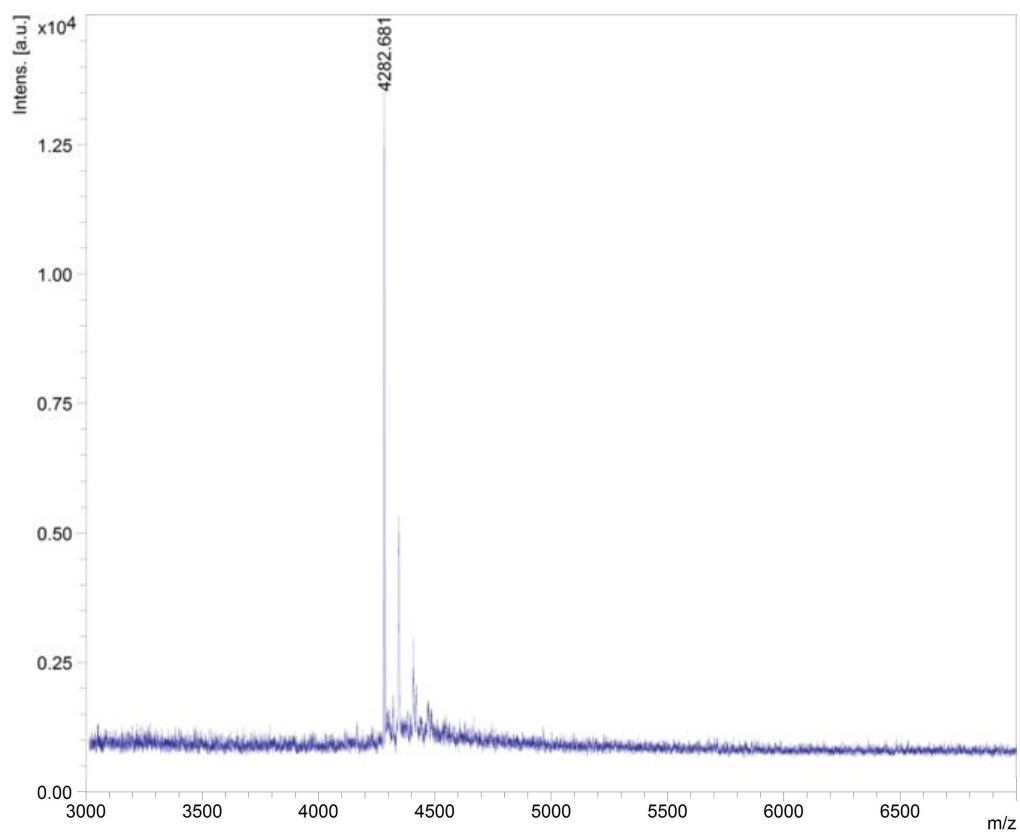



# UD-14

[B conc. MeCN: 7-40% (30 min)]

mV

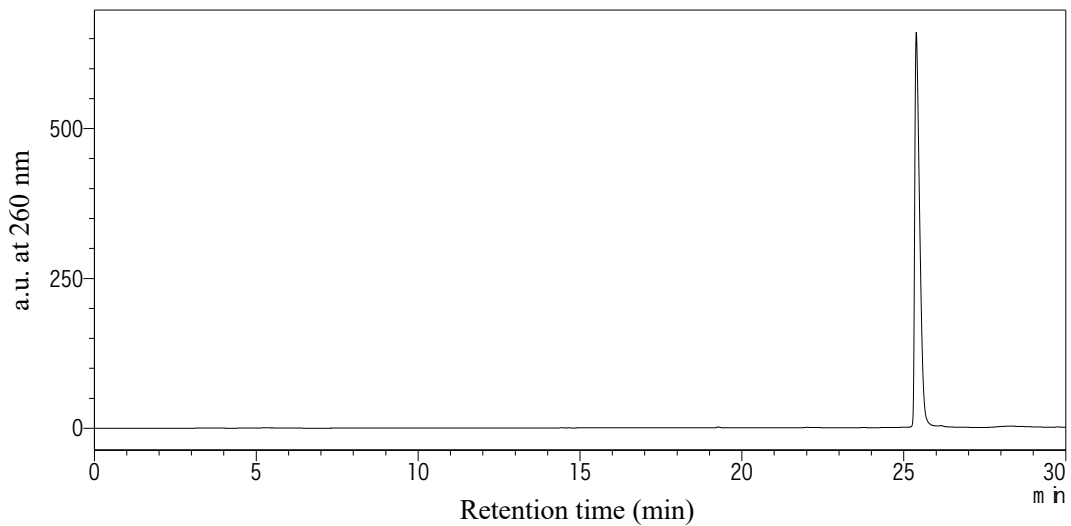

[calcd. (M-H)<sup>-</sup>: 4292.2, found: 4292.8]

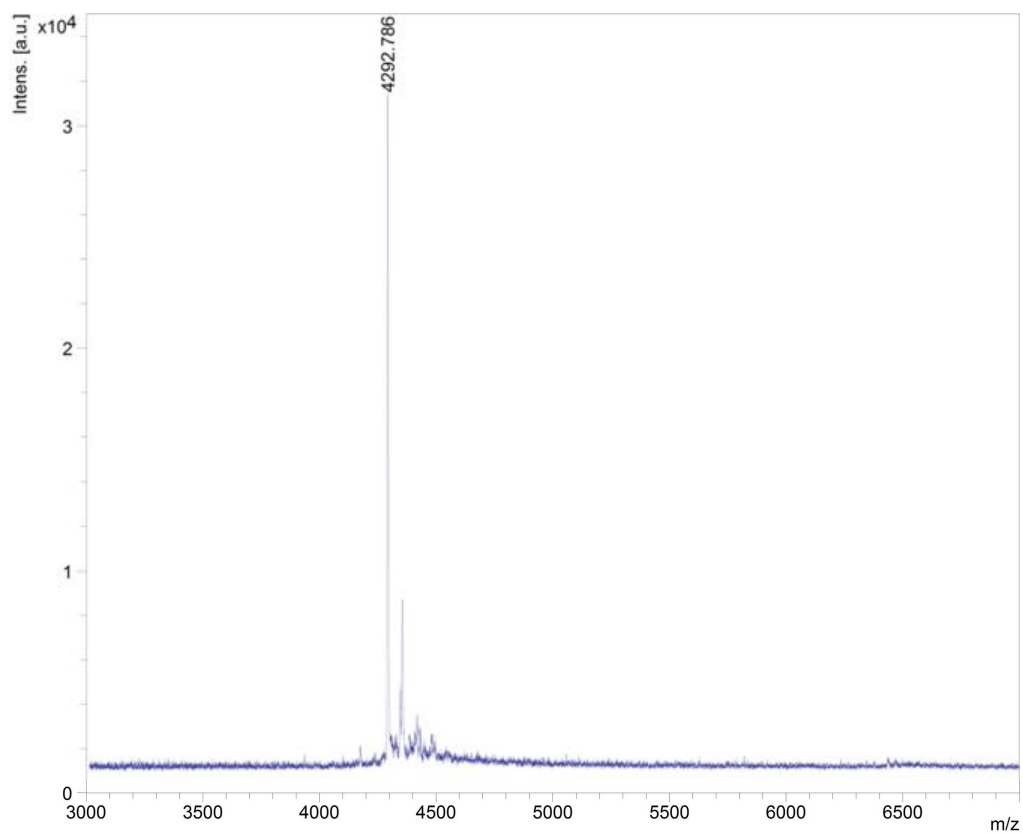

## UD-15

[B conc. MeCN: 7-40% (30 min)]

mV

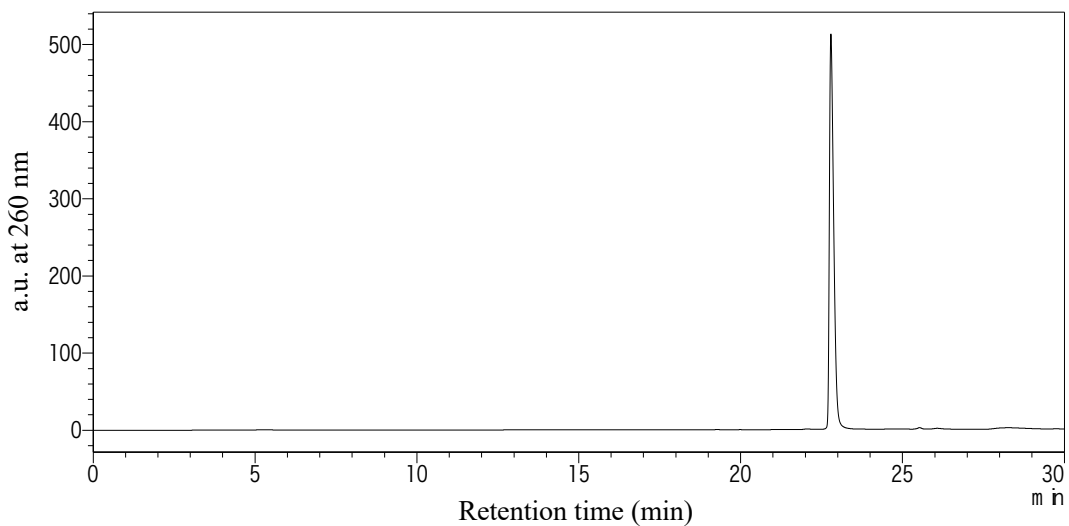

[calcd. (M-H)<sup>-</sup>: 4266.2, found: 4266.1]

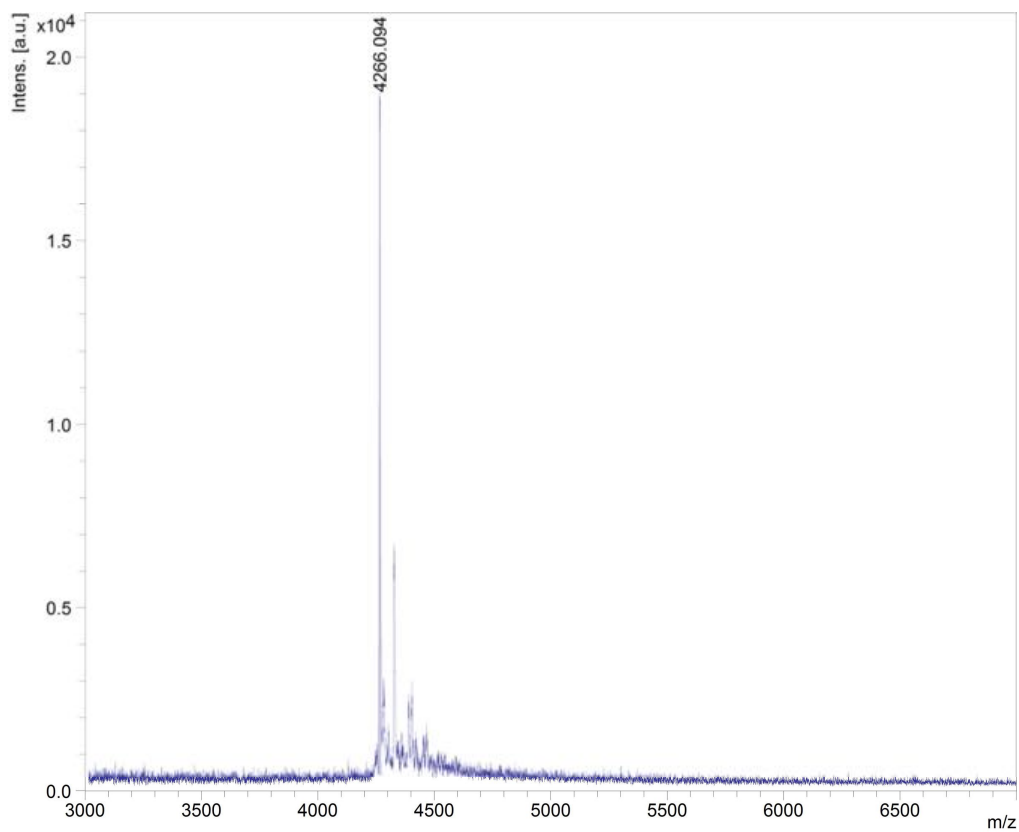

## UD-16

[B conc. MeCN: 7-40% (30 min)]

mV

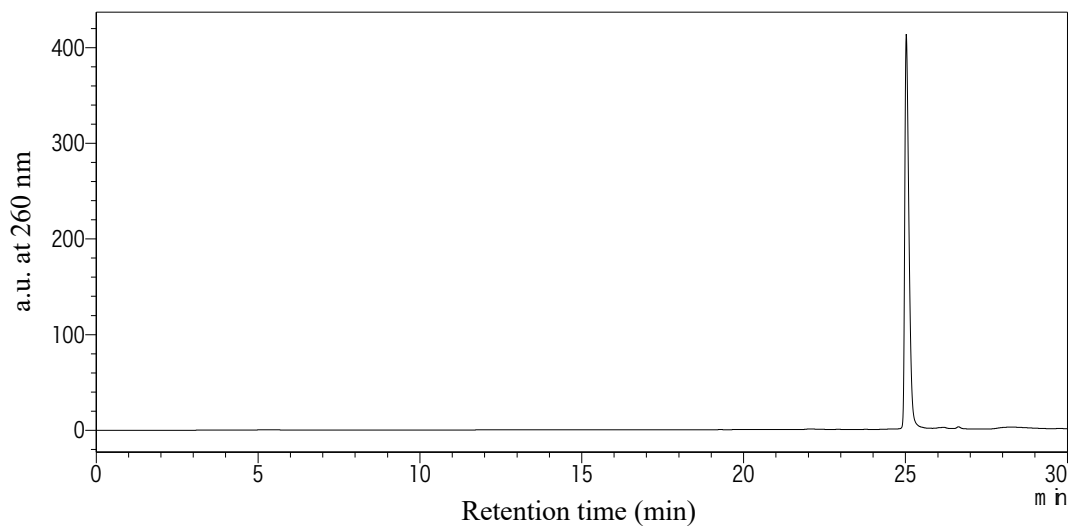

[calcd. (M-H)<sup>-</sup>: 4300.2, found: 4300.8]

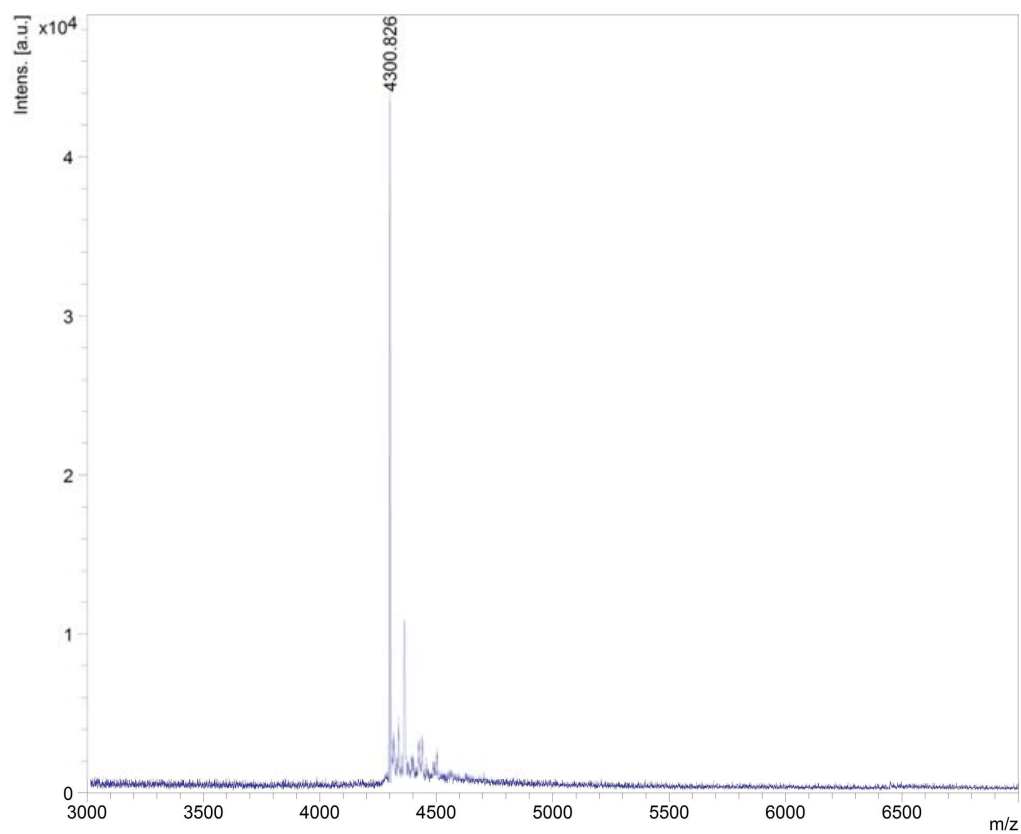

**UD-17**

[B conc. MeCN: 7-40% (30 min)]

mV

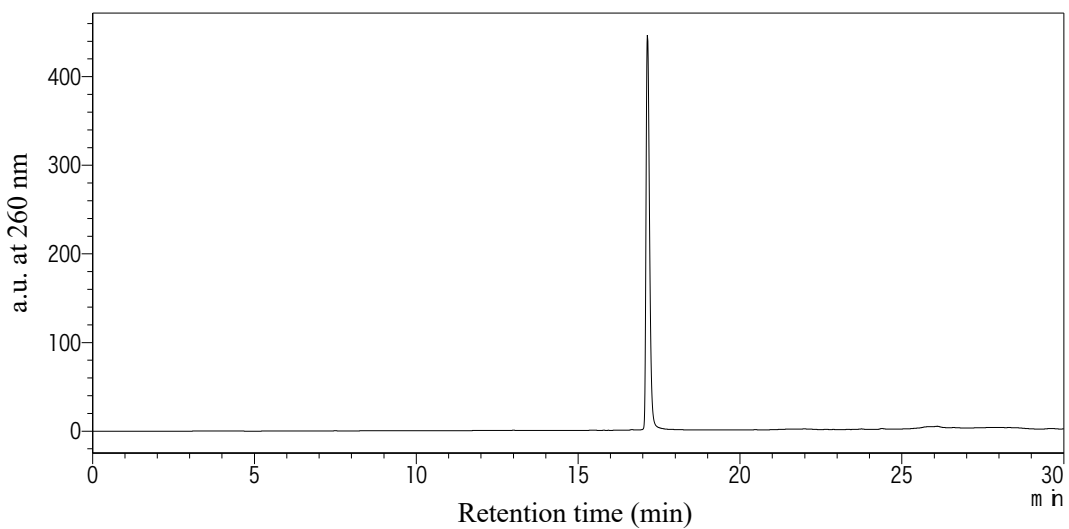

[calcd. (M-H)<sup>-</sup>: 4309.2, found: 4309.9]

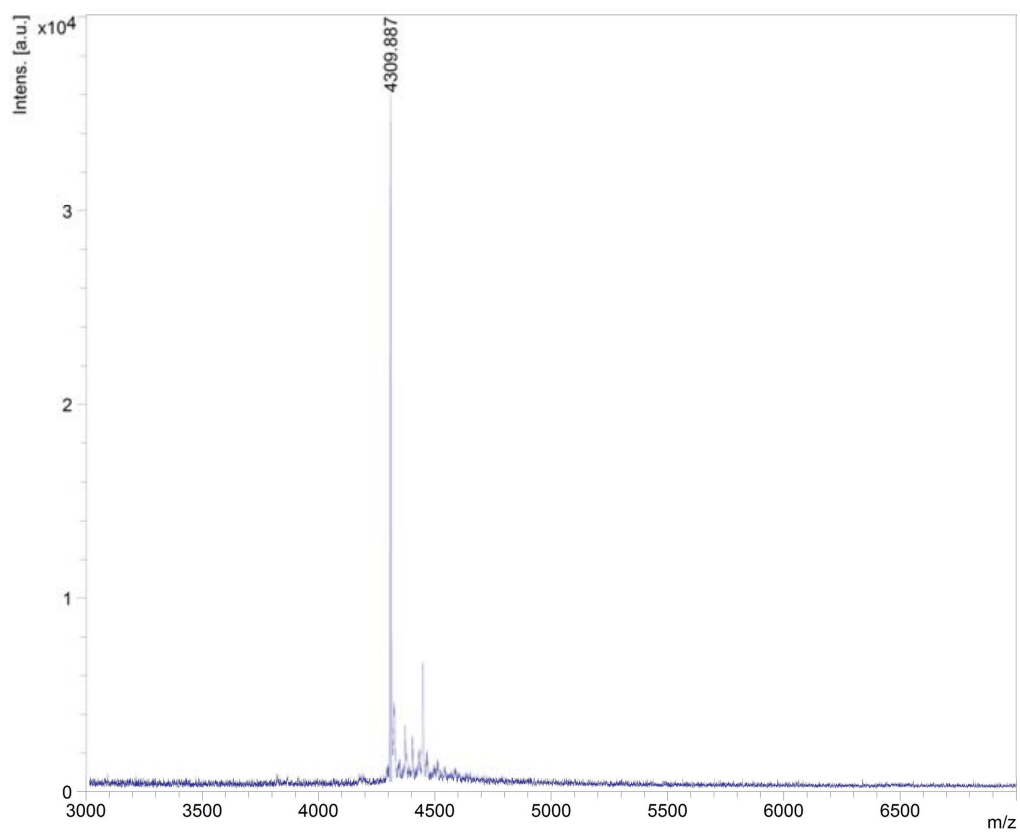

# UD-18

[B conc. MeCN: 7-40% (30 min)]

mV

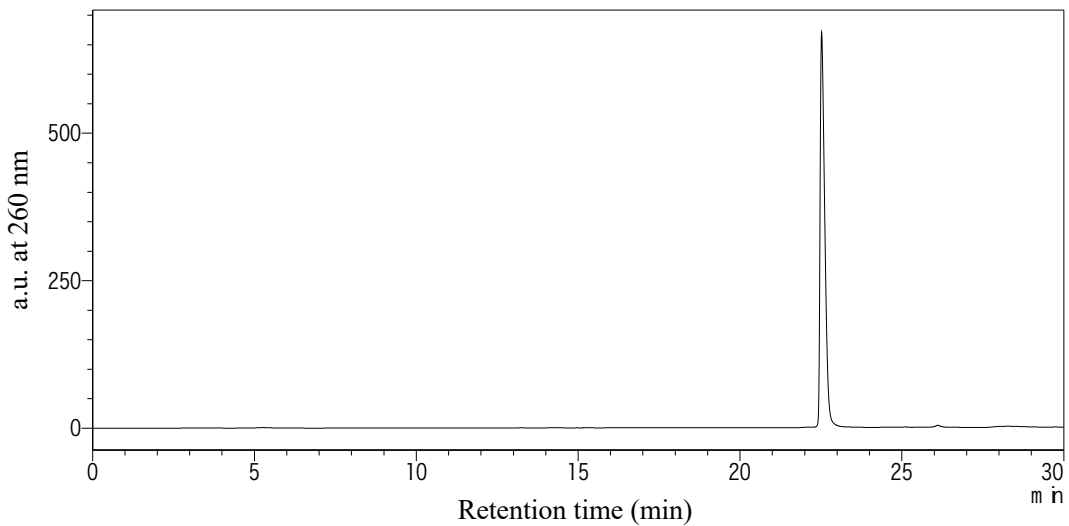

[calcd. (M-H)<sup>-</sup>: 4274.2, found: 4274.2]

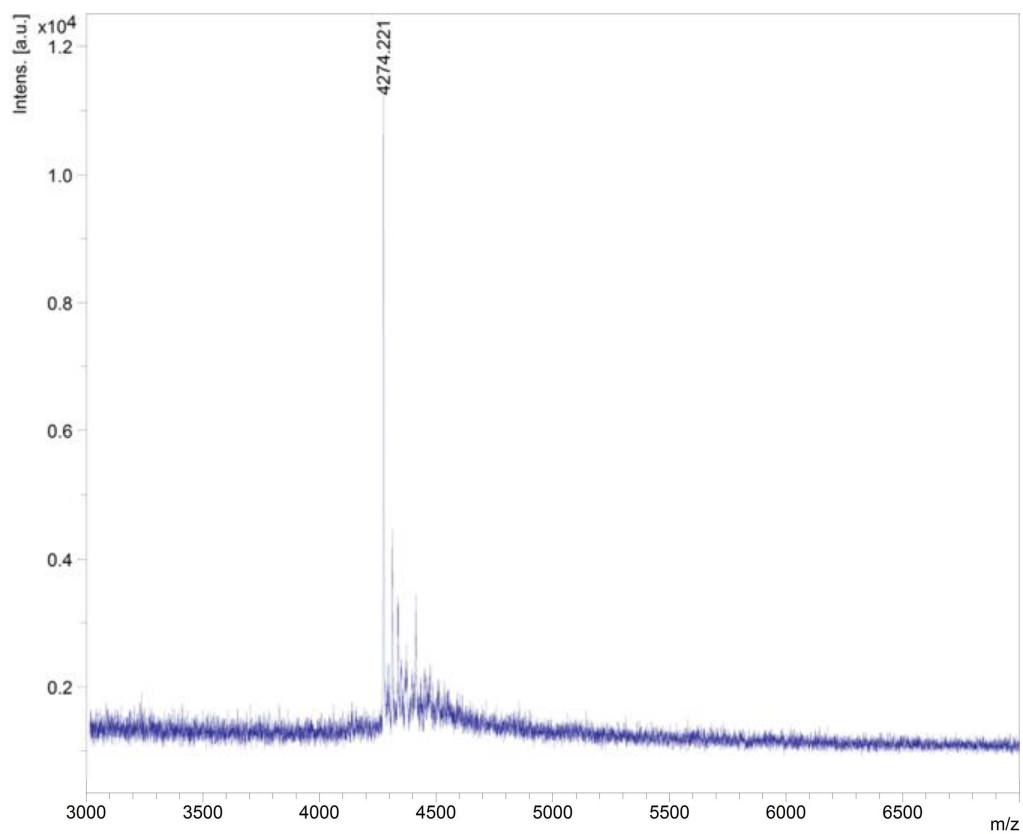

## UD-19

[B conc. MeCN: 7-40% (30 min)]

mV

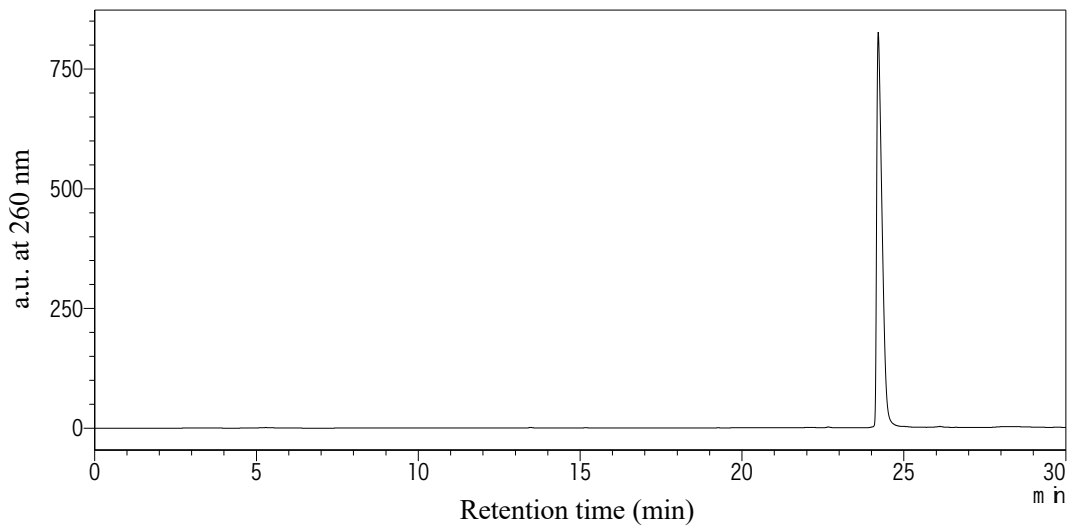

[calcd. (M-H)<sup>-</sup>: 4322.2, found: 4322.7]

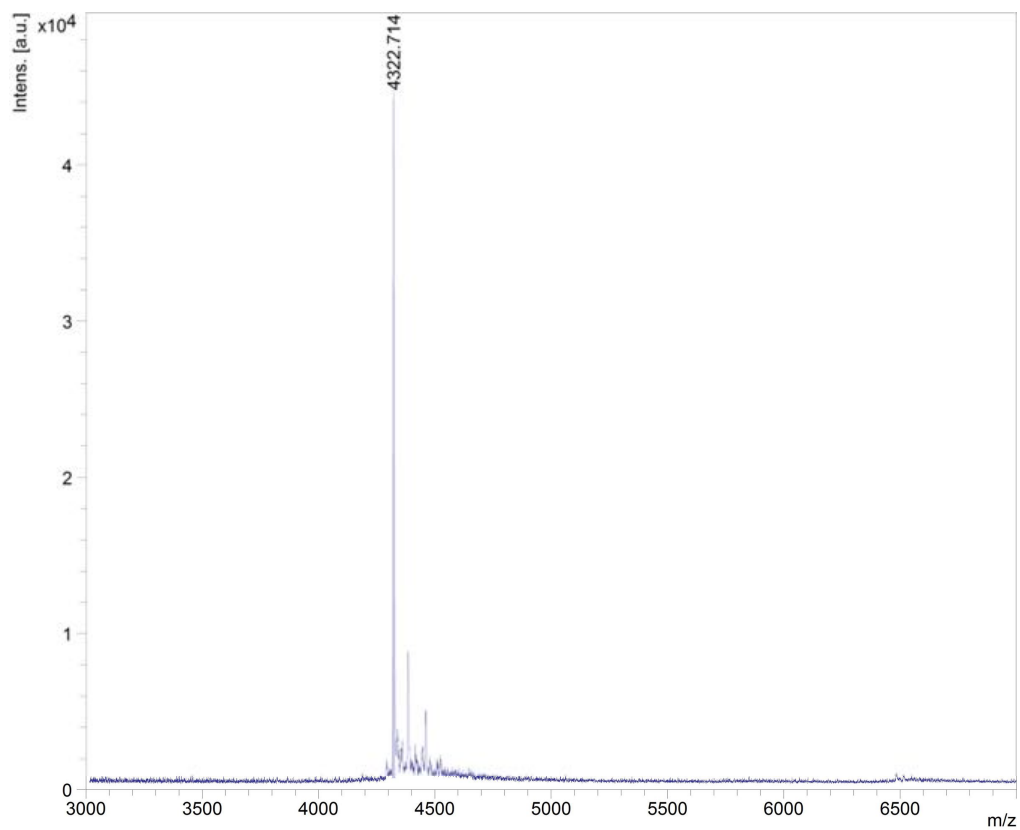

**UD-20**

[B conc. MeCN: 7-40% (30 min)]

mV

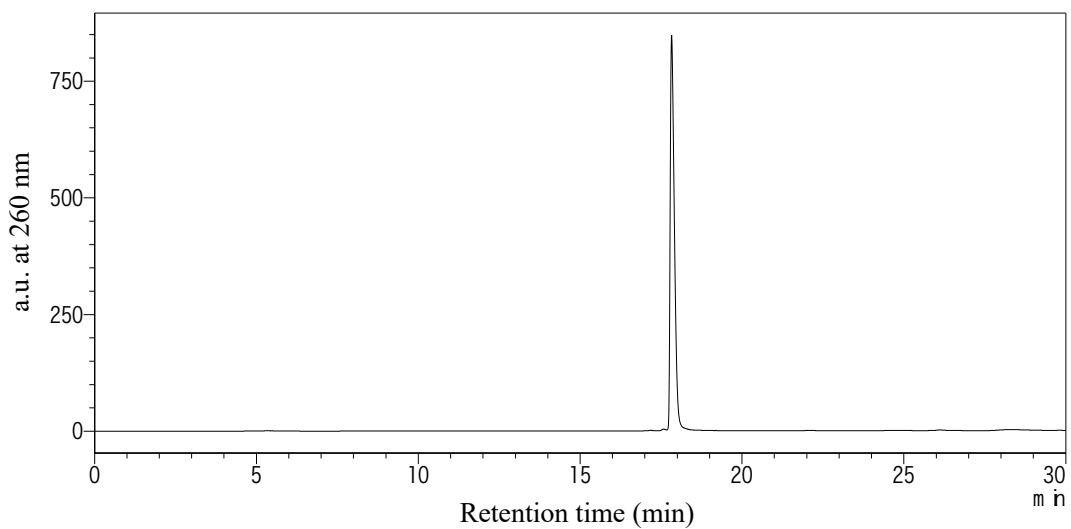

[calcd. (M-H)<sup>-</sup>: 4290.2, found: 4290.0]

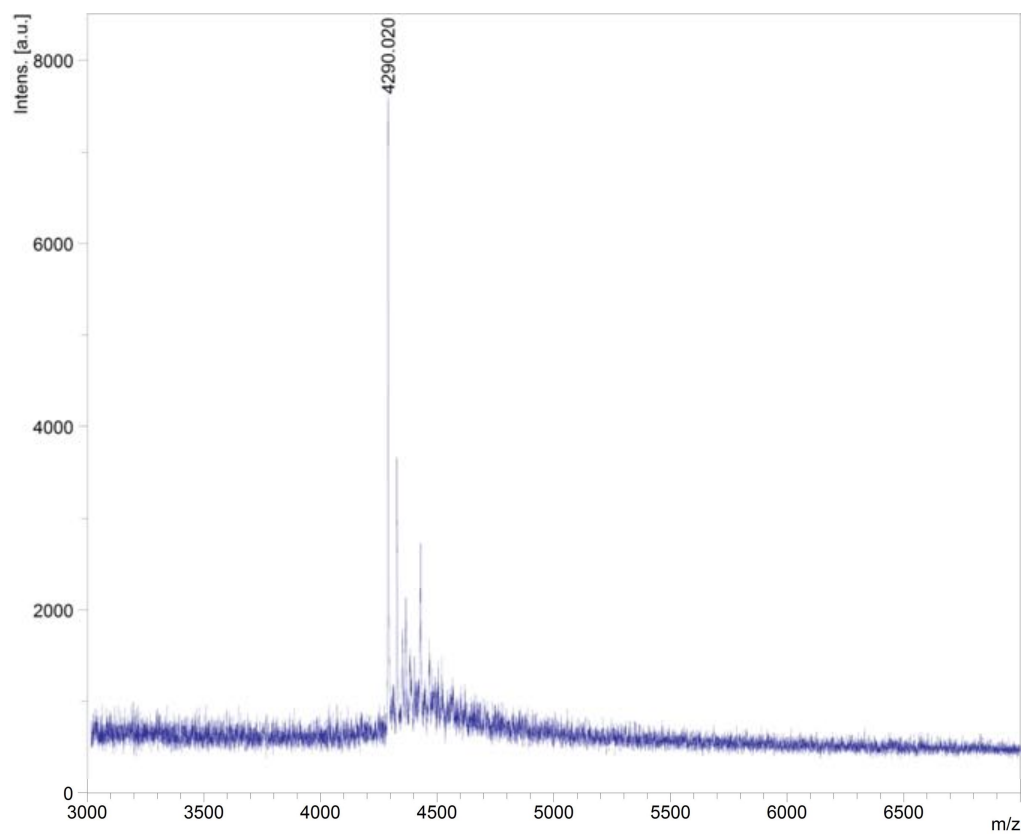

**UD-21**

[B conc. MeCN: 7-40% (30 min)]

mV

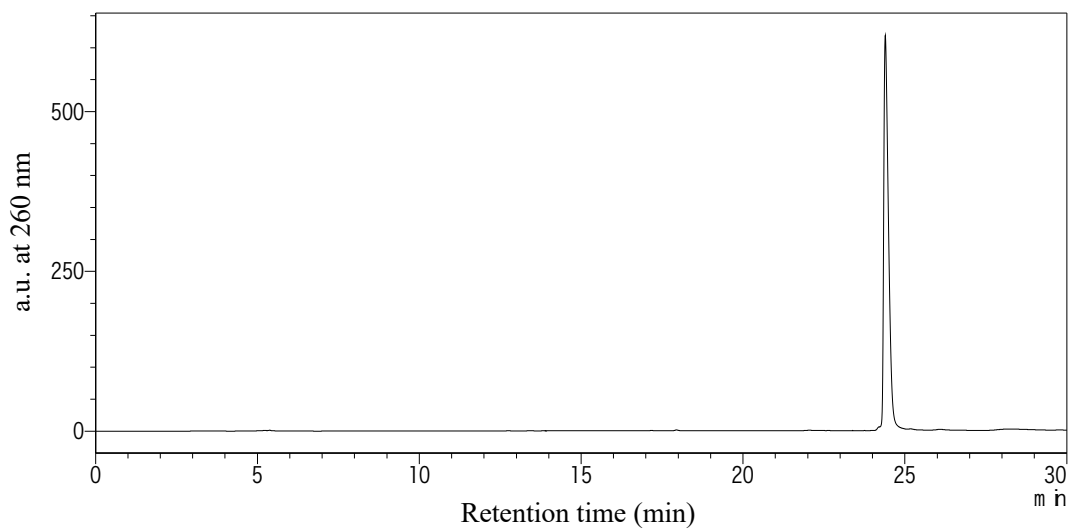

[calcd. (M-H)<sup>-</sup>: 4300.2, found: 4300.1]

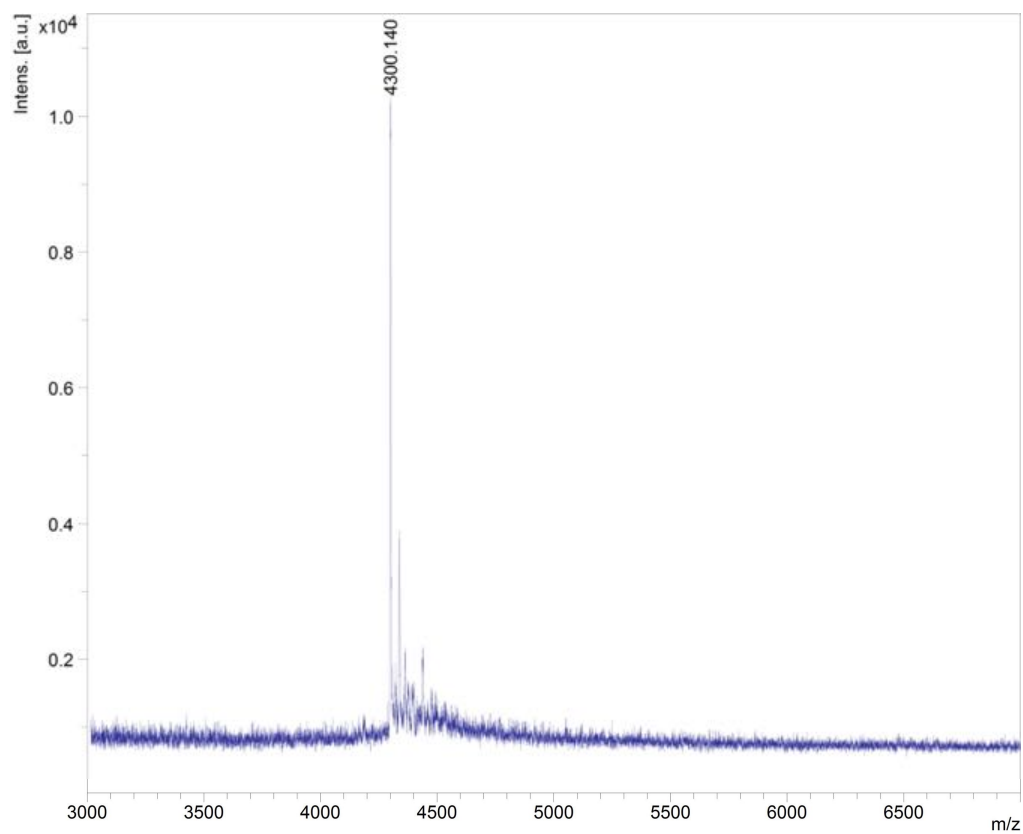



**UD-22**

[B conc. MeCN: 7-40% (30 min)]

mV

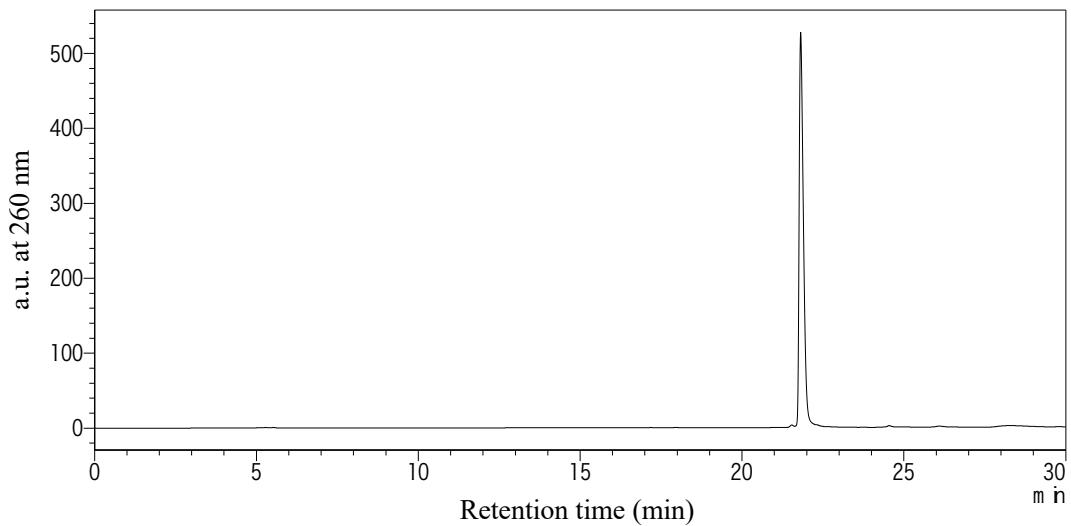

[calcd. (M-H)<sup>-</sup>: 4274.2, found: 4275.1]

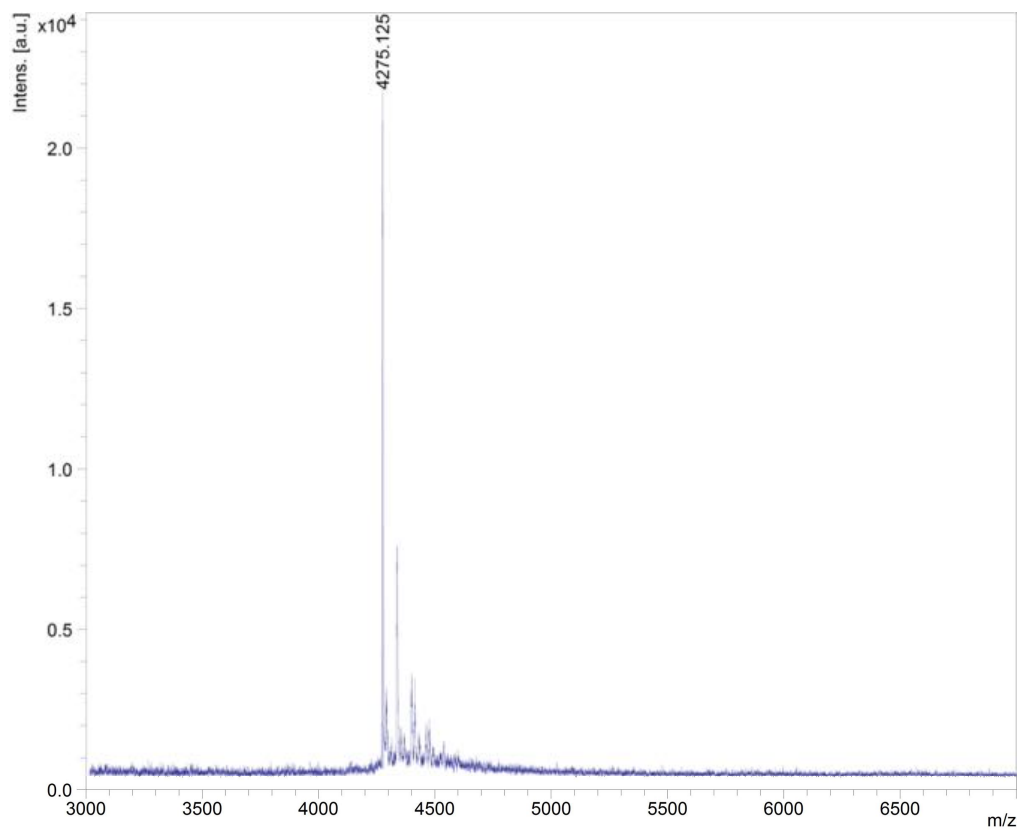

**UD-23**

[B conc. MeCN: 7-40% (30 min)]

mV

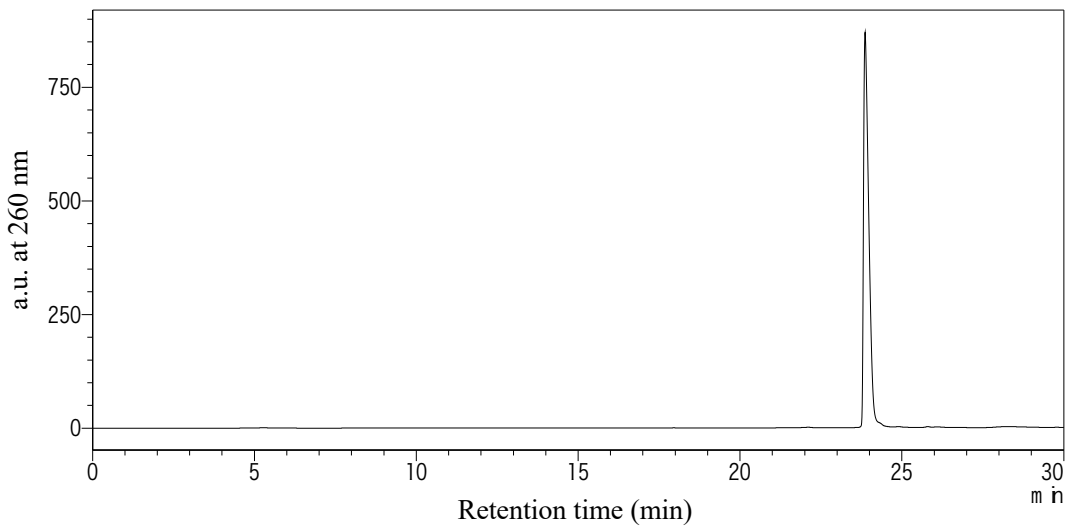

[calcd. (M-H)<sup>-</sup>: 4308.2, found: 4308.1]

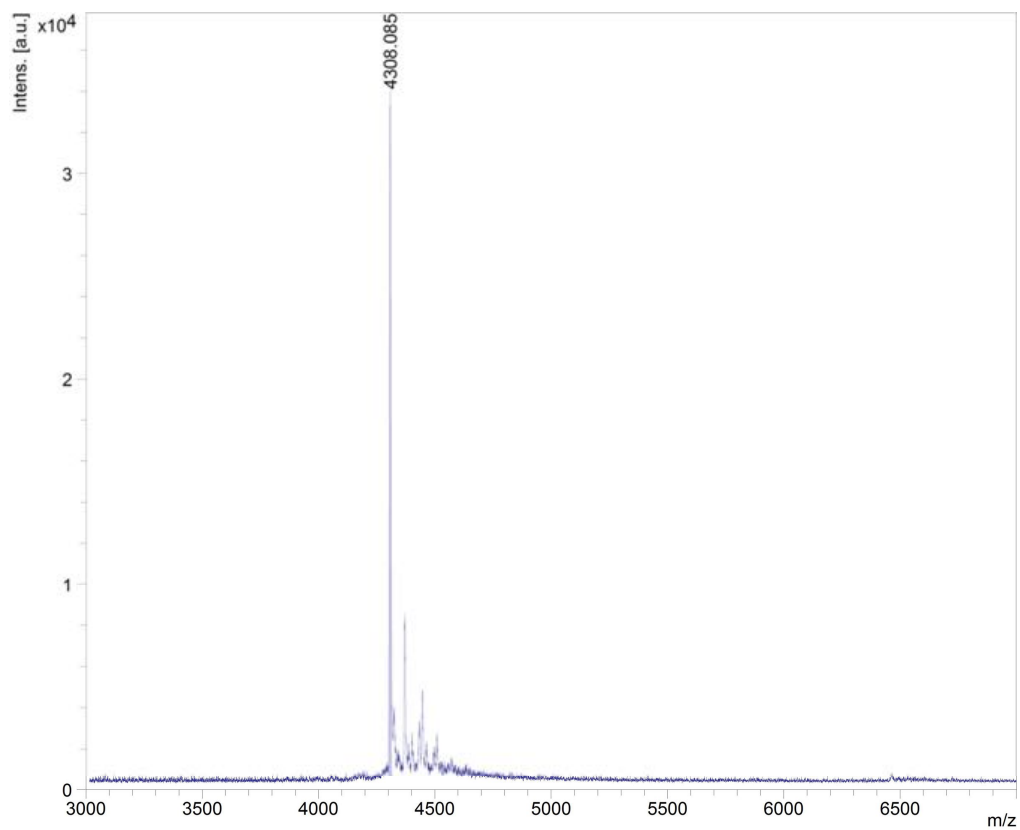

## UD-24

[B conc. MeCN: 7-40% (30 min)]

mV

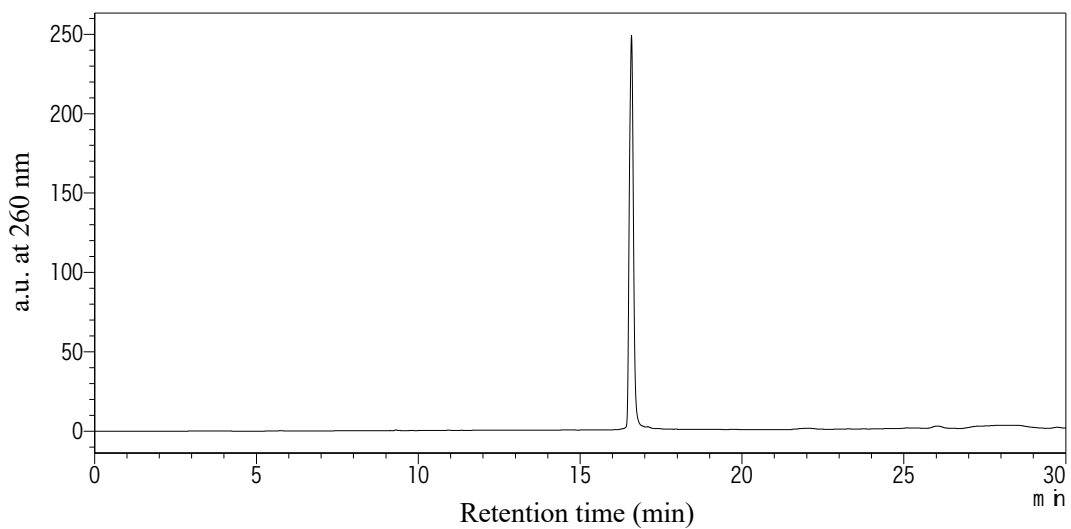

[calcd. (M-H)<sup>-</sup>: 4317.2, found: 4318.4]

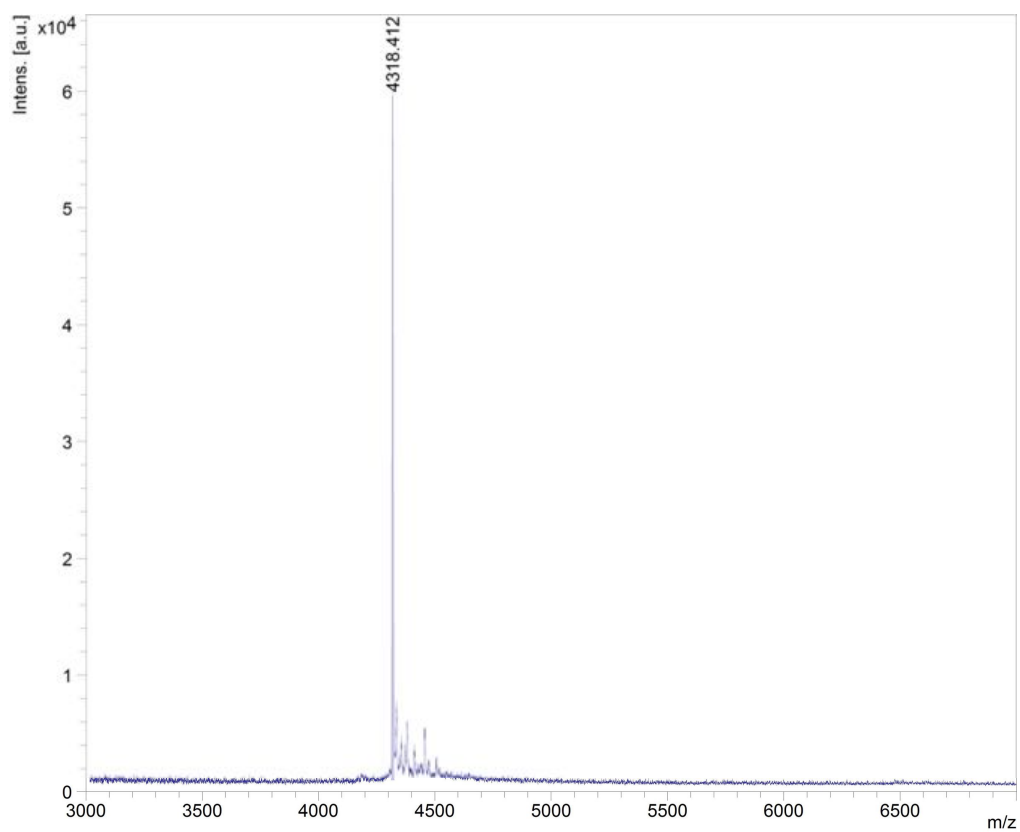

**UD-27**

[B conc. MeCN: 7-40% (30 min)]

mV

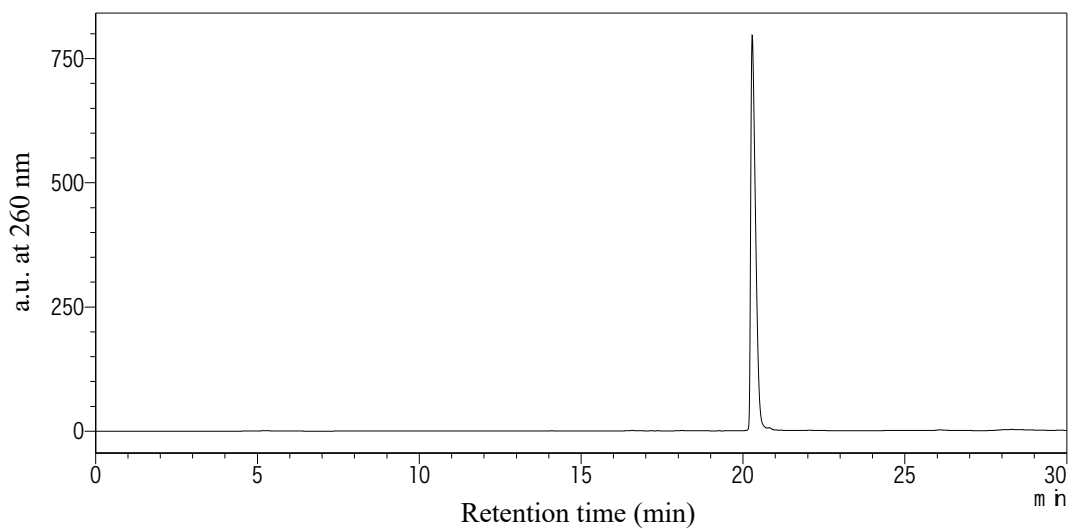

[calcd. (M-H)<sup>-</sup>: 4176.1, found: 4176.7]

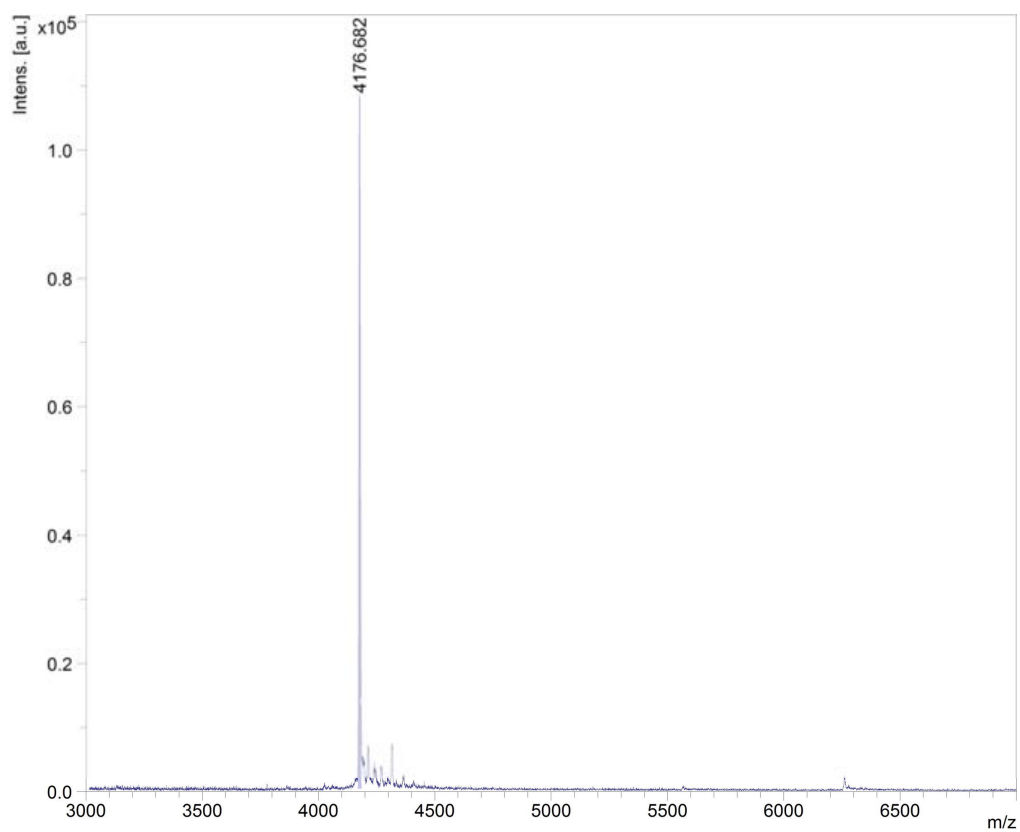

UD-28

[B conc. MeCN: 7-40% (30 min)]

mV

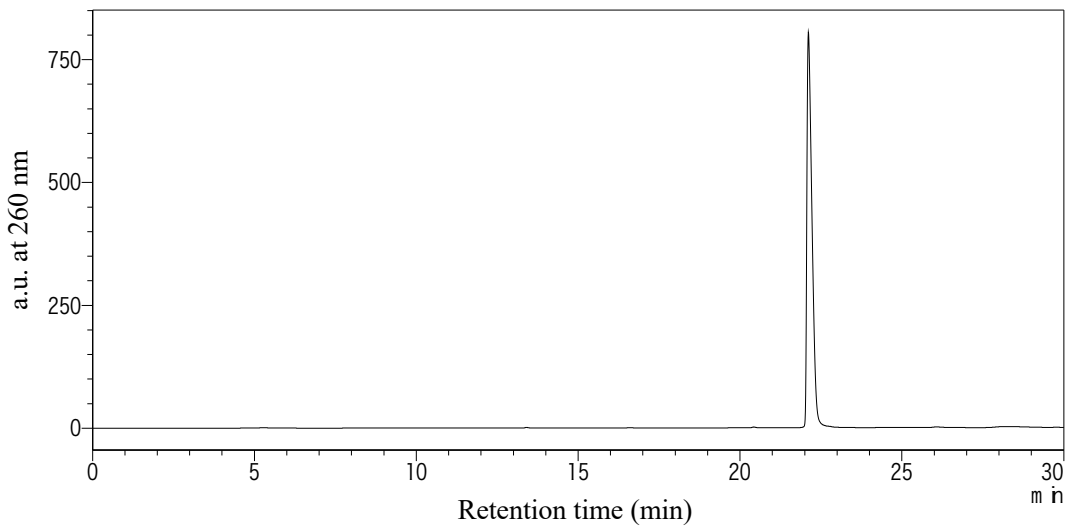

[calcd. (M-H)<sup>-</sup>: 4224.1, found: 4224.6]

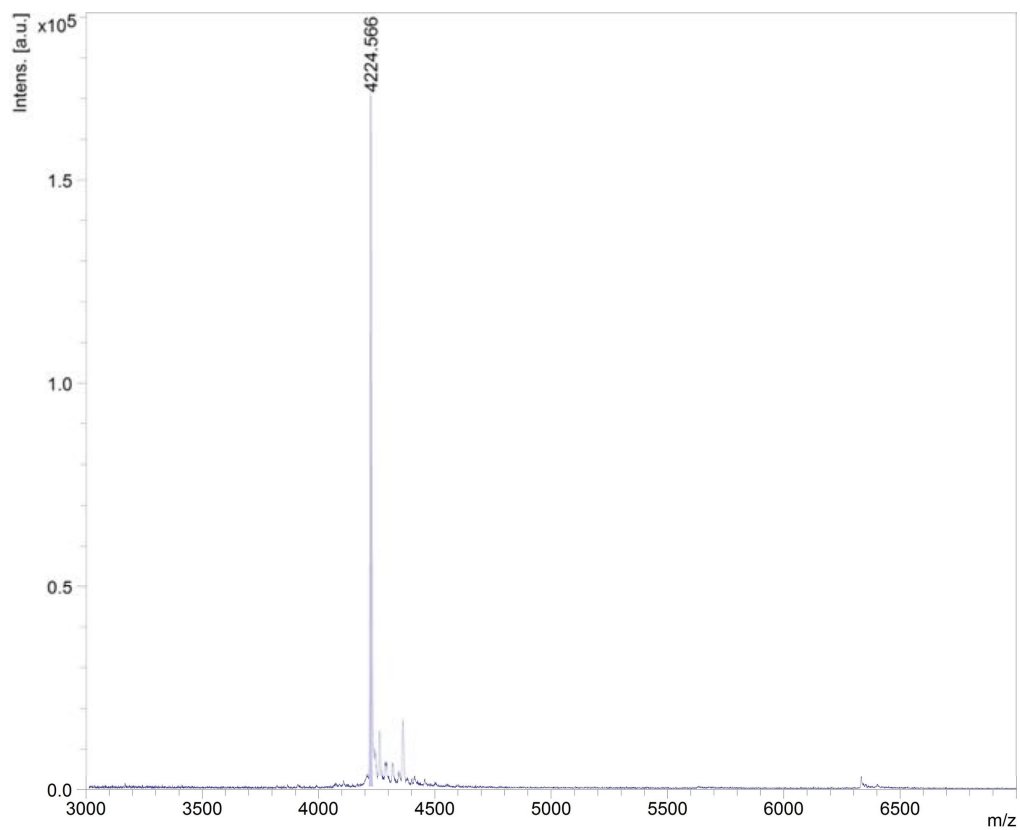

UD-29

[B conc. MeCN: 7-40% (30 min)]

mV

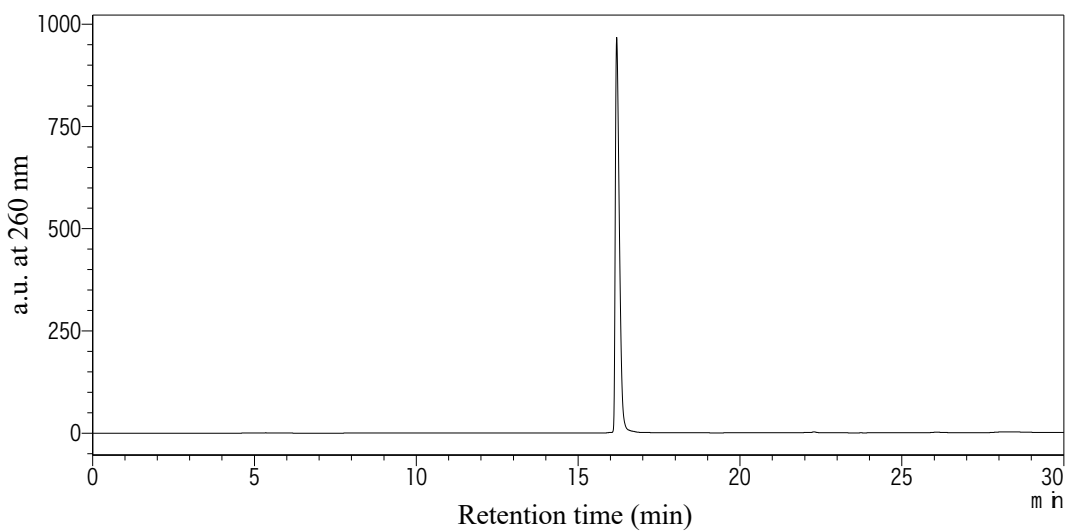

[calcd. (M-H)<sup>-</sup>: 4192.1, found: 4191.8]

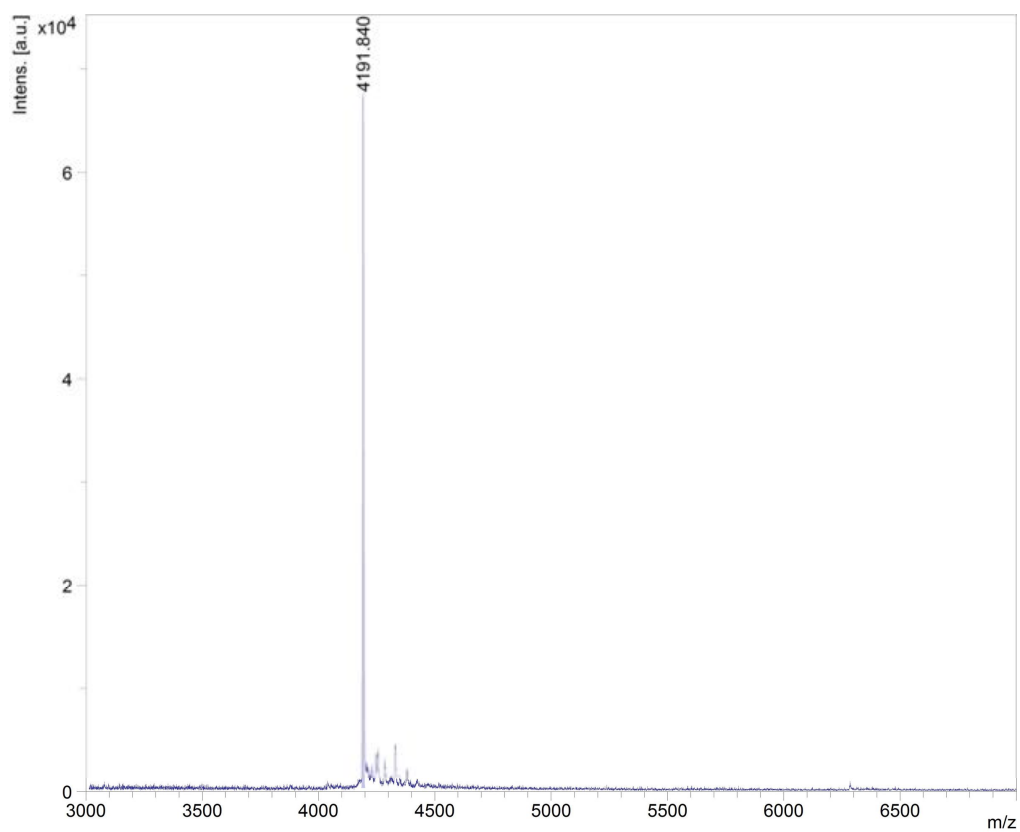

**UD-30**

[B conc. MeCN: 7-40% (30 min)]

mV

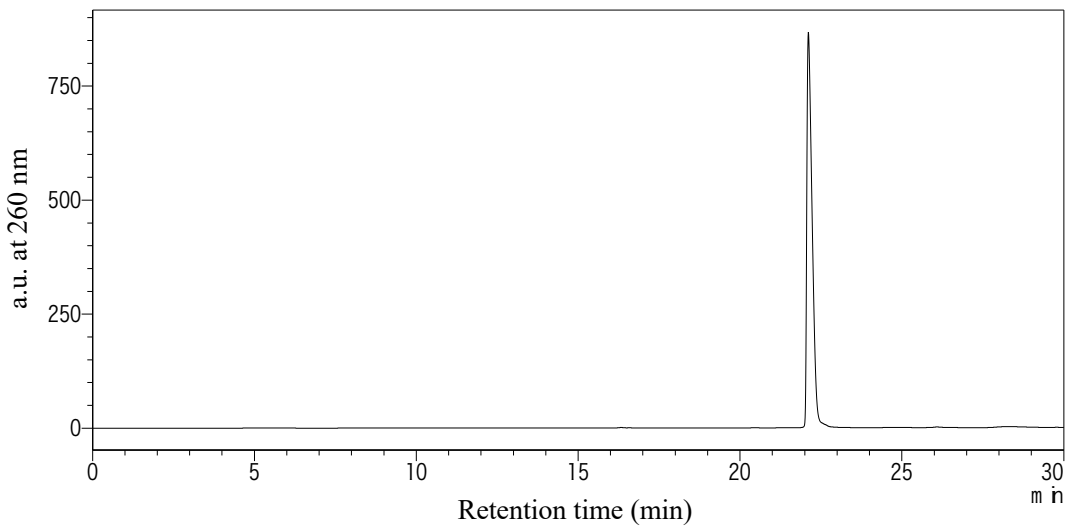

[calcd. (M-H)<sup>-</sup>: 4202.1, found: 4203.8]

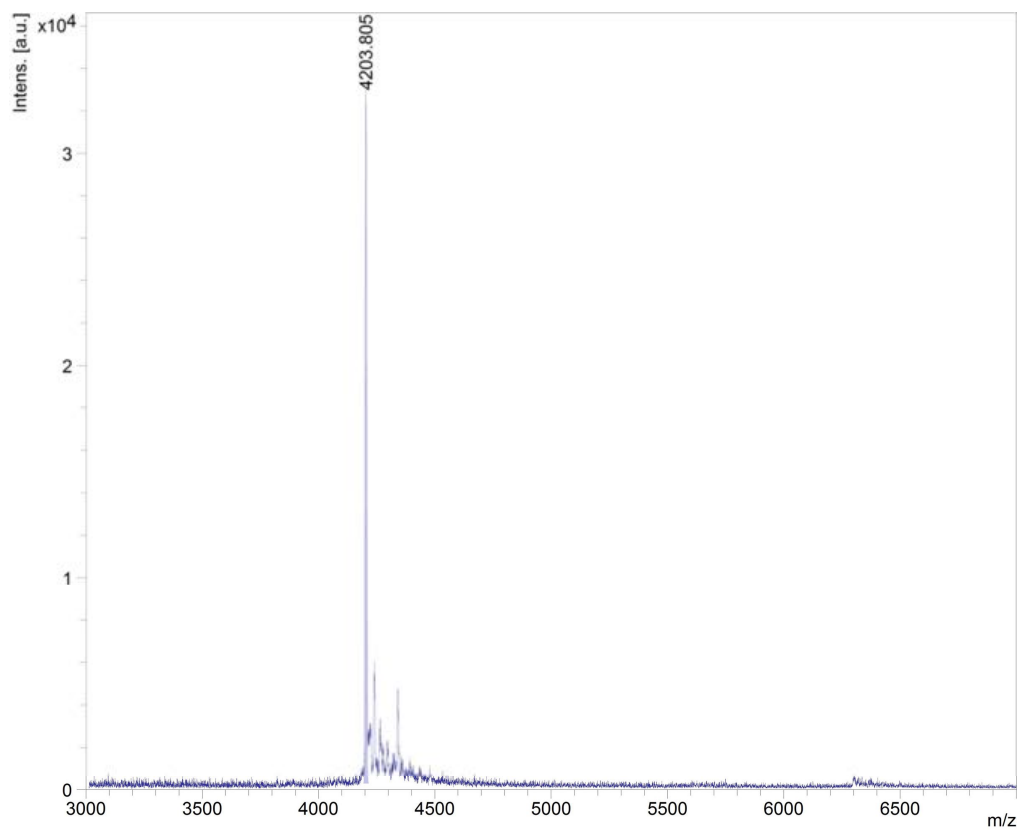

**UD-31**

[B conc. MeCN: 7-40% (30 min)]

mV

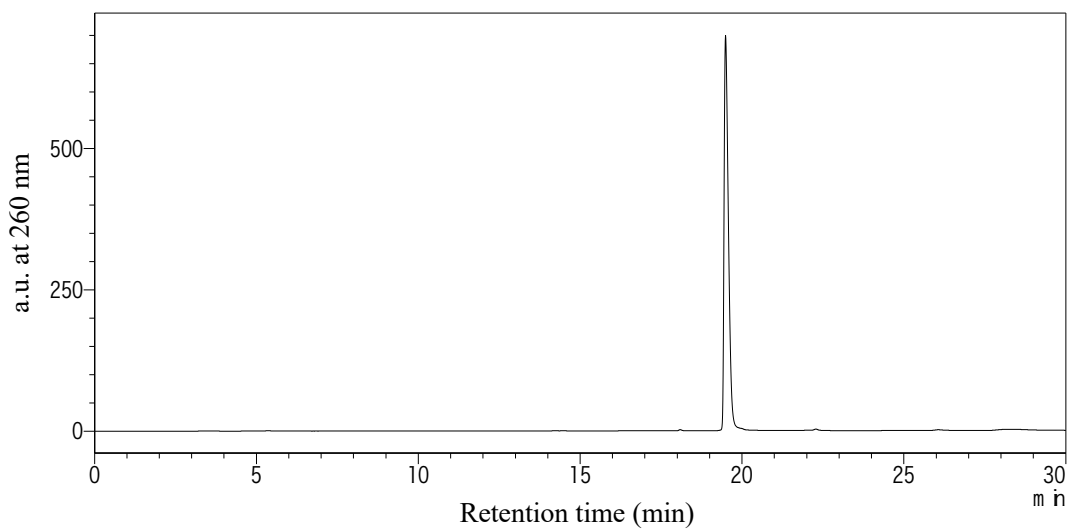

[calcd. (M-H)<sup>-</sup>: 4176.1, found: 4177.8]

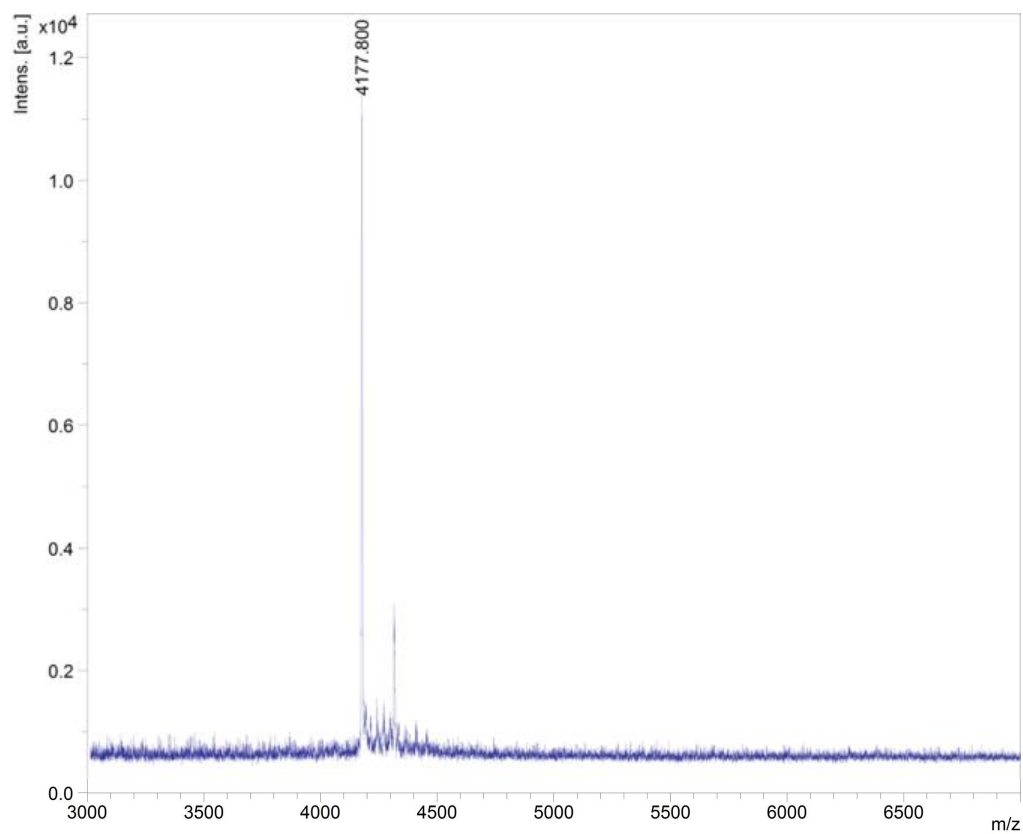



## UD-32

[B conc. MeCN: 7-40% (30 min)]

mV

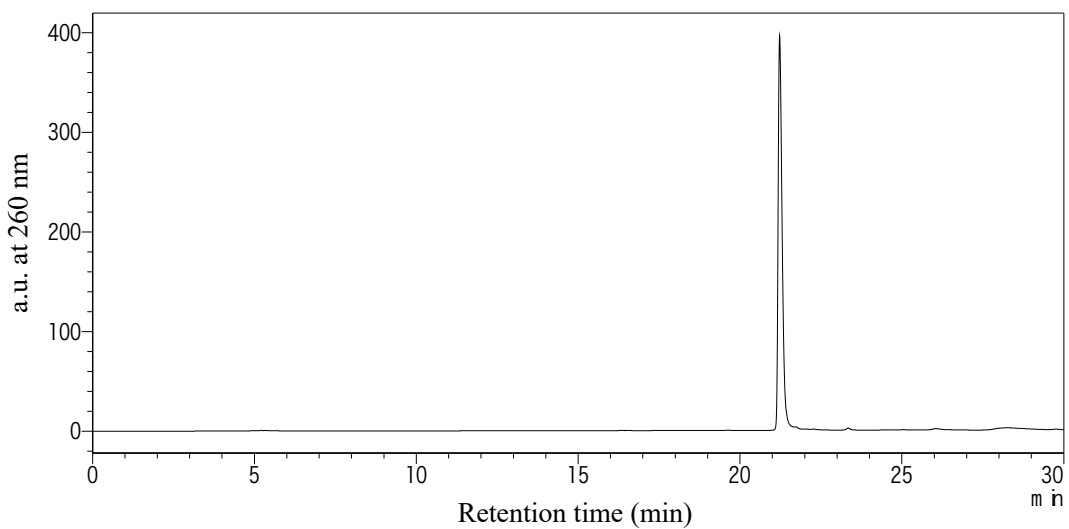

[calcd. (M-H)<sup>-</sup>: 4210.1, found: 4210.8]

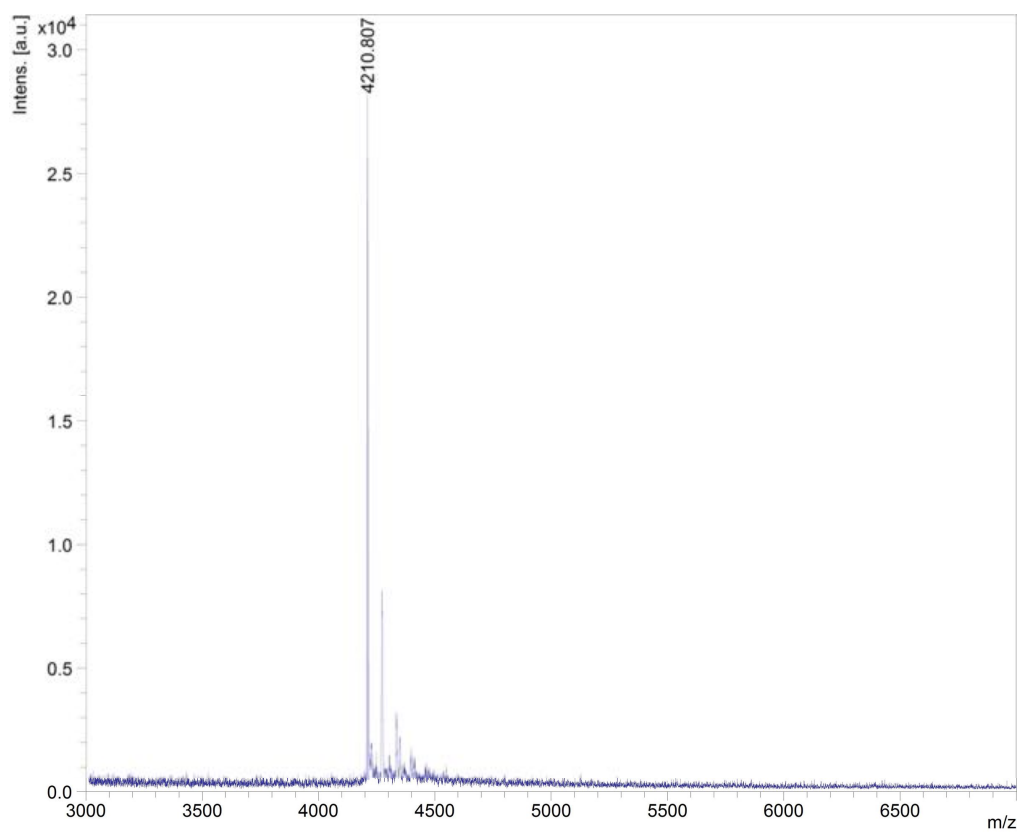

# UD-33

[B conc. MeCN: 7-40% (30 min)]

mV

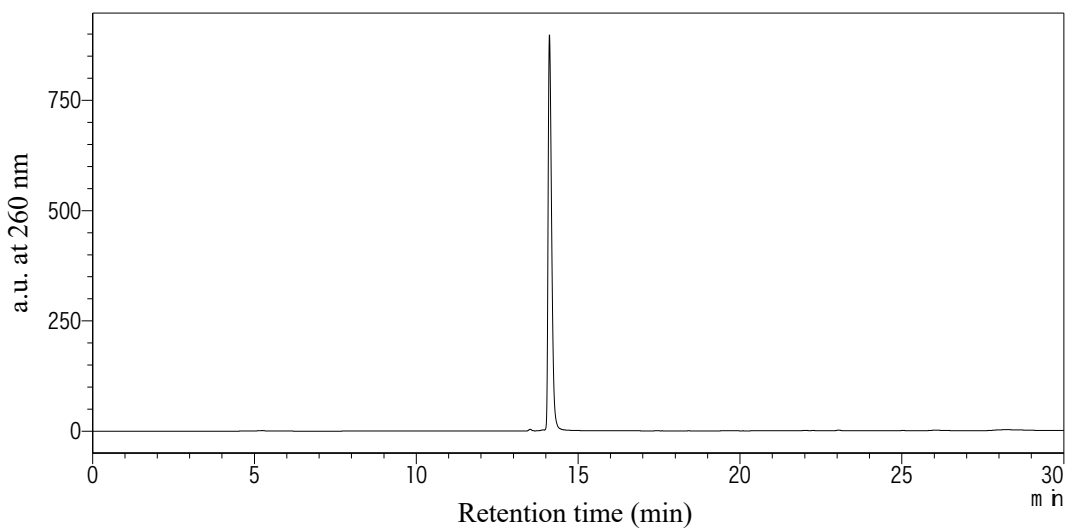

[calcd. (M-H)<sup>-</sup>: 4219.2, found: 4218.7]

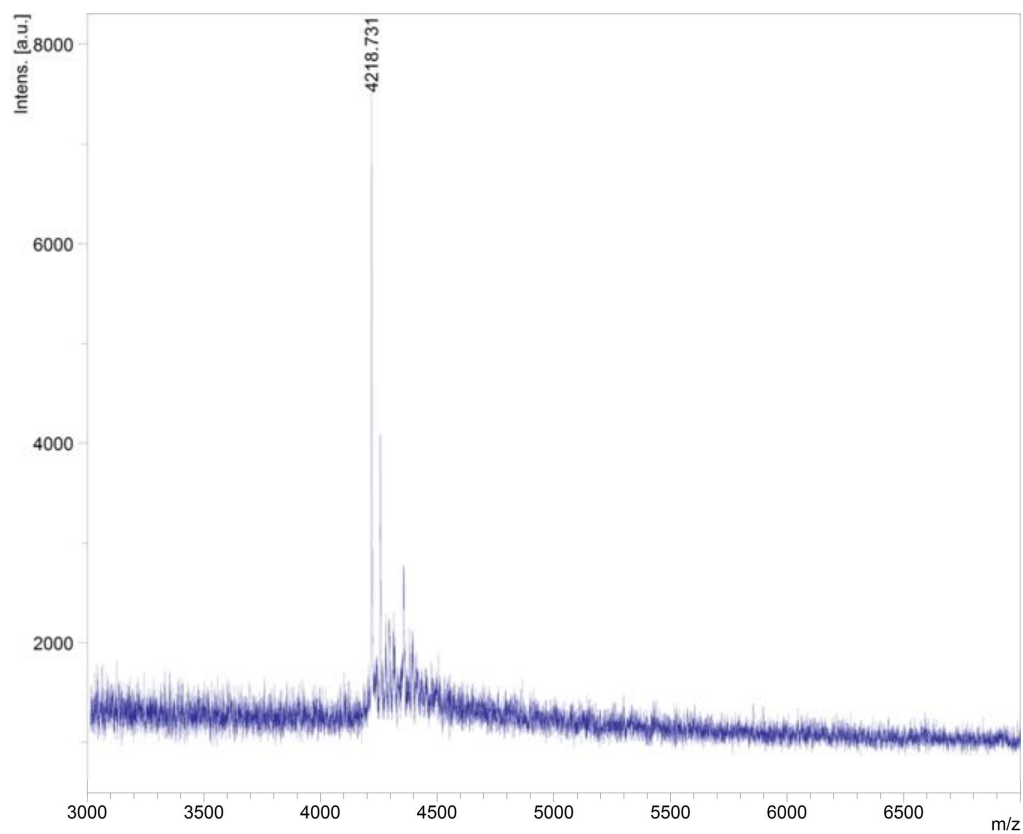

UD-34

[B conc. MeCN: 7-40% (30 min)]

mV

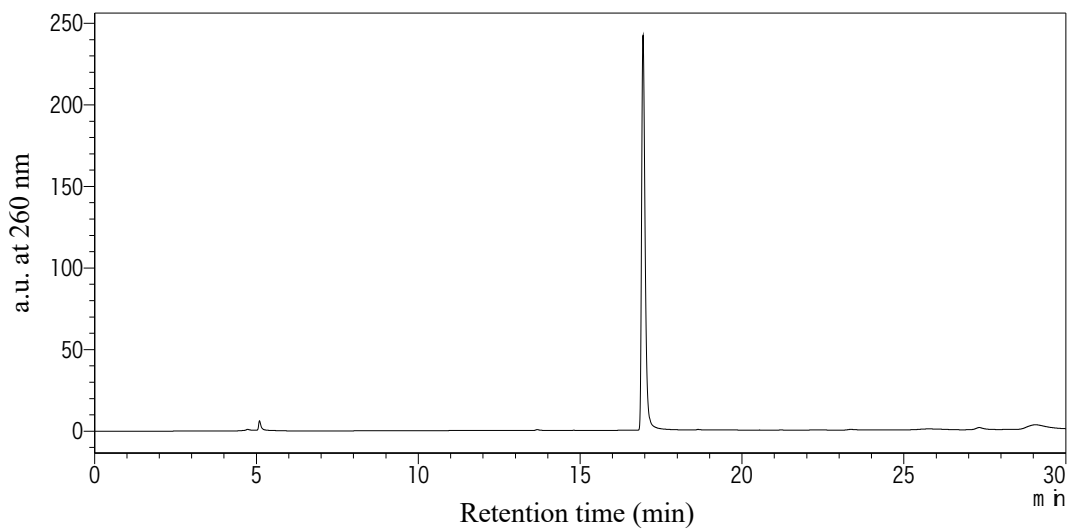

[calcd. (M-H)<sup>-</sup>: 4192.1, found: 4192.7]

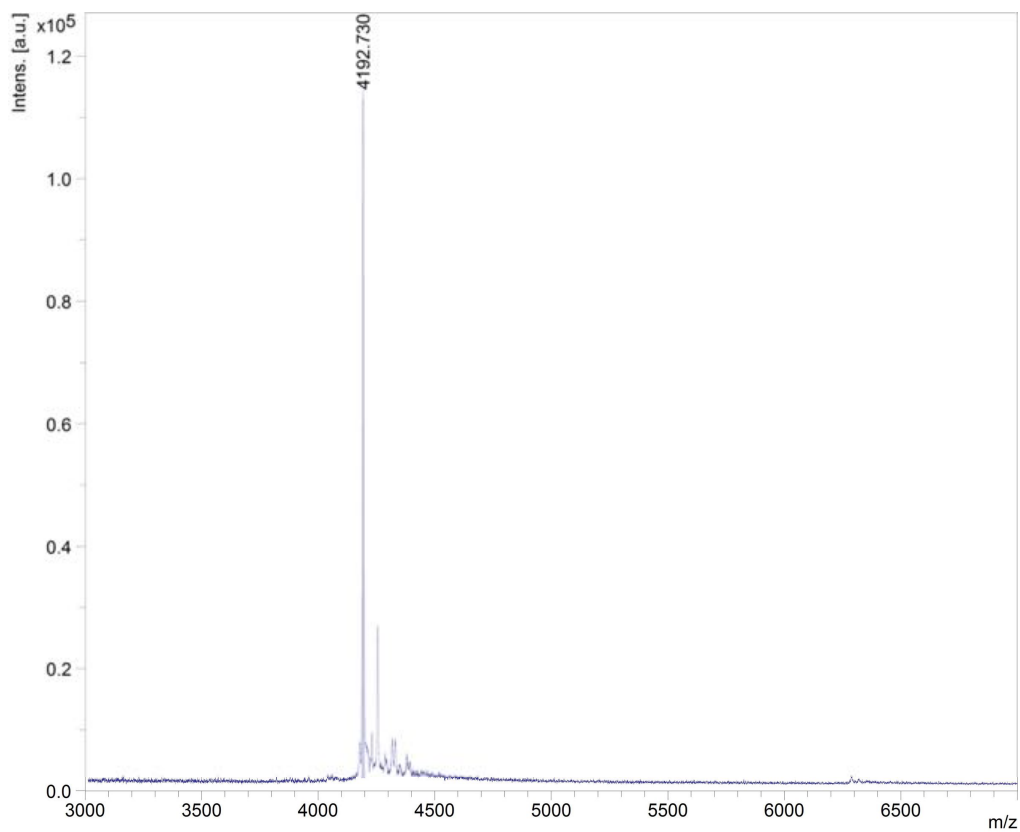

**UD-35**

[B conc. MeCN: 7-40% (30 min)]

mV

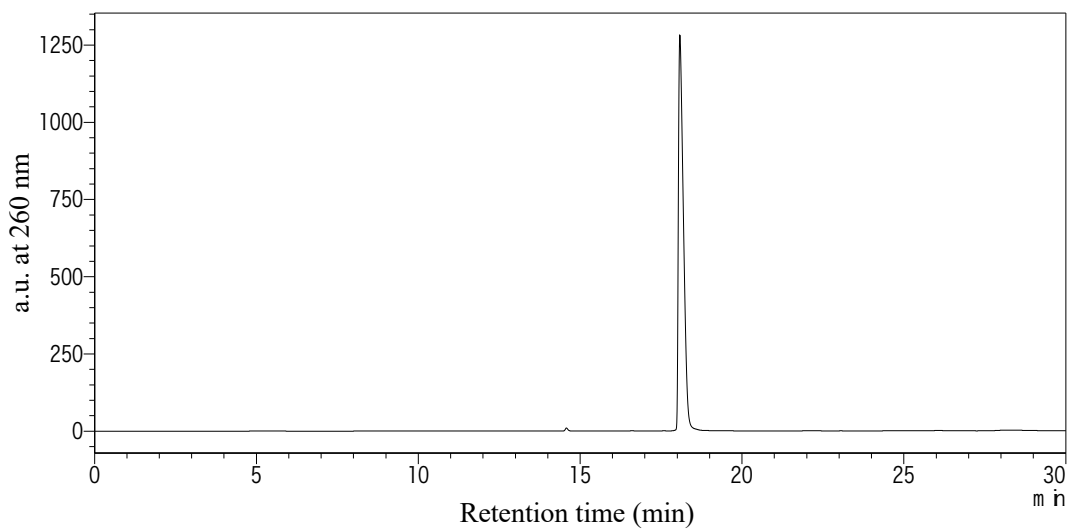

[calcd. (M-H)<sup>-</sup>: 4240.1, found: 4240.6]

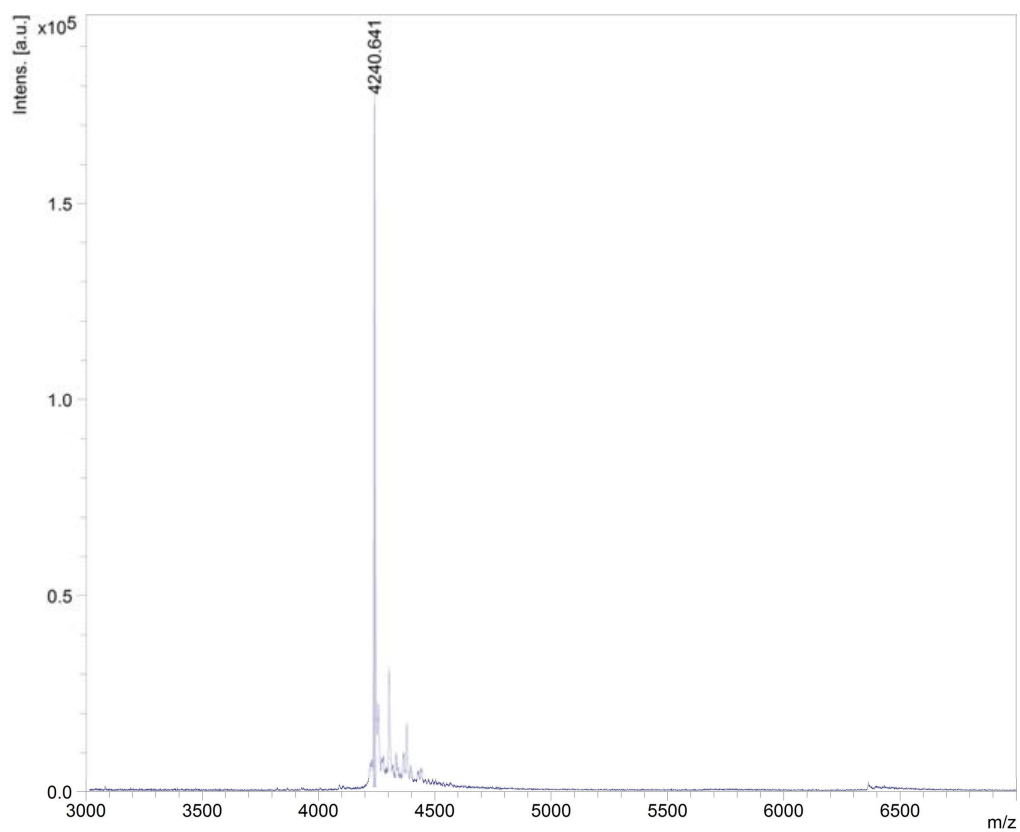

# UD-36

[B conc. MeCN: 7-40% (30 min)]

mV

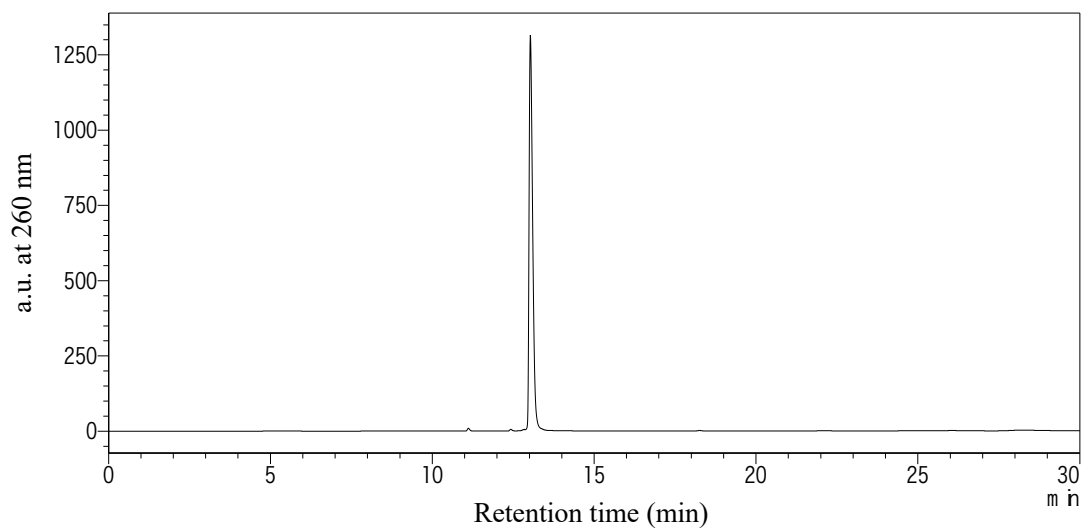

[calcd. (M-H)<sup>-</sup>: 4208.1, found: 4209.0]

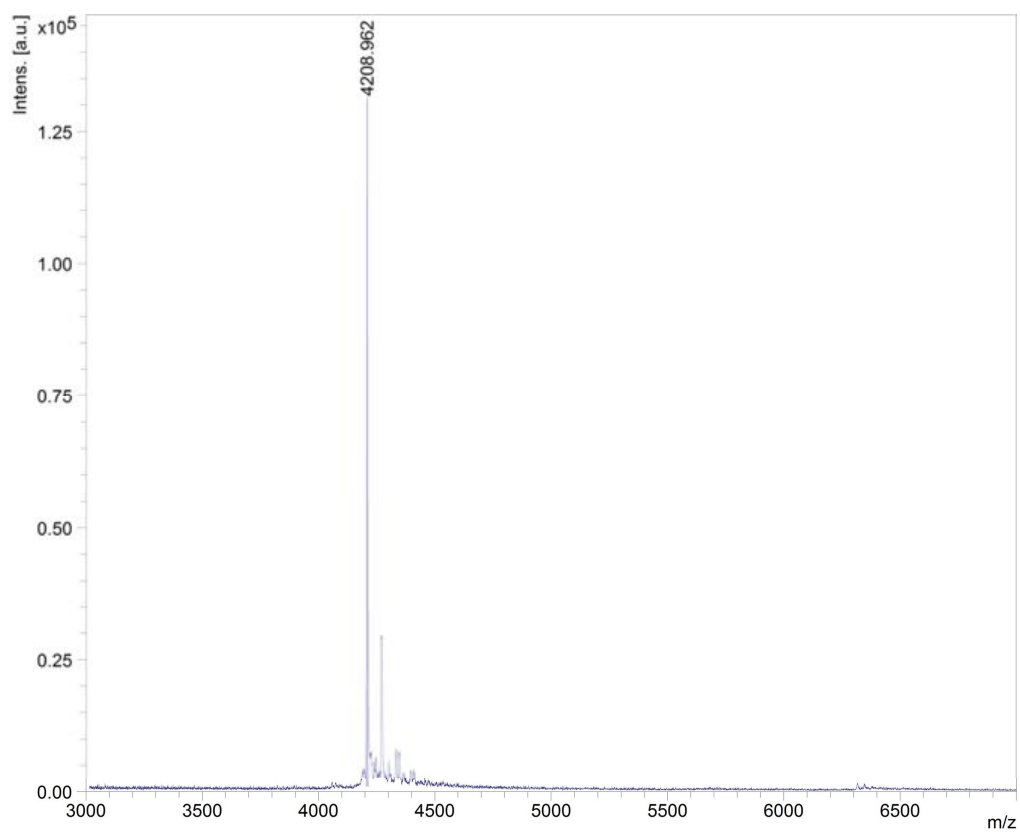

**UD-37**

[B conc. MeCN: 7-40% (30 min)]

mV

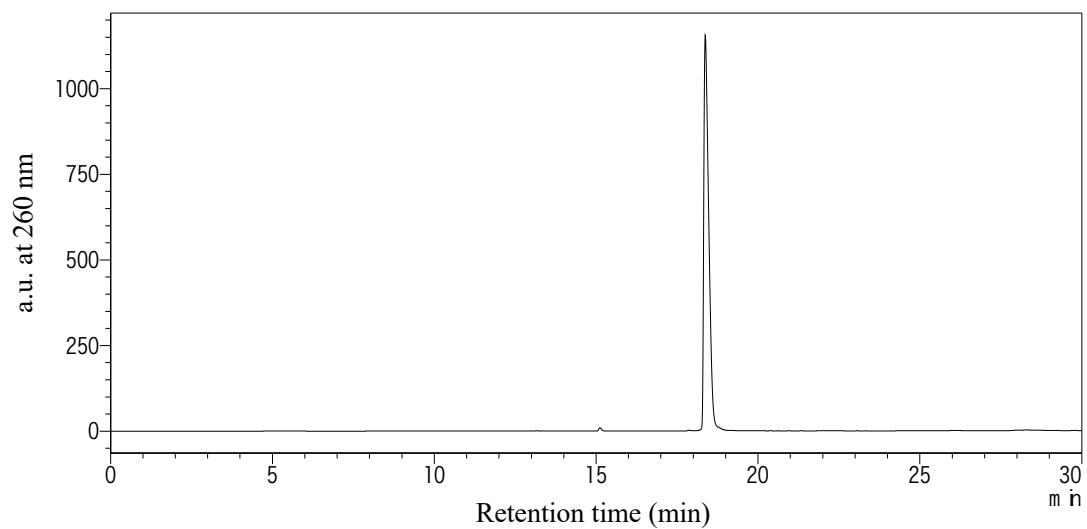

[calcd. (M-H)<sup>-</sup>: 4218.1, found: 4218.6]

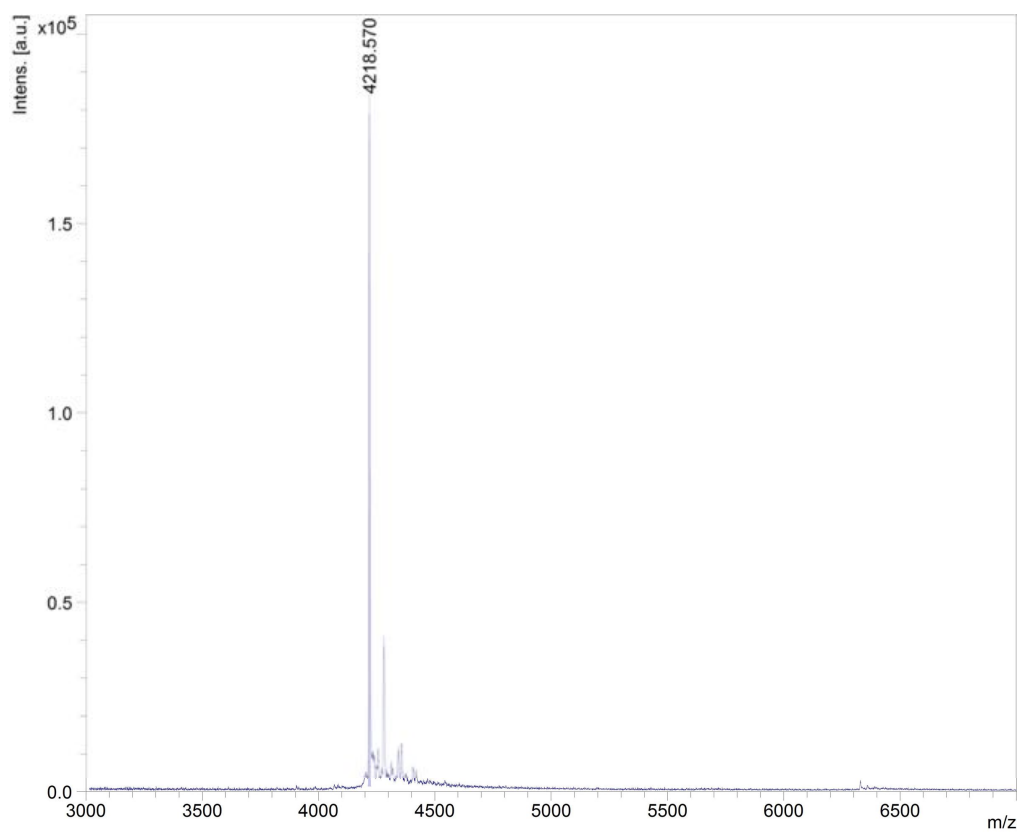

**UD-38**

[B conc. MeCN: 7-40% (30 min)]

mV

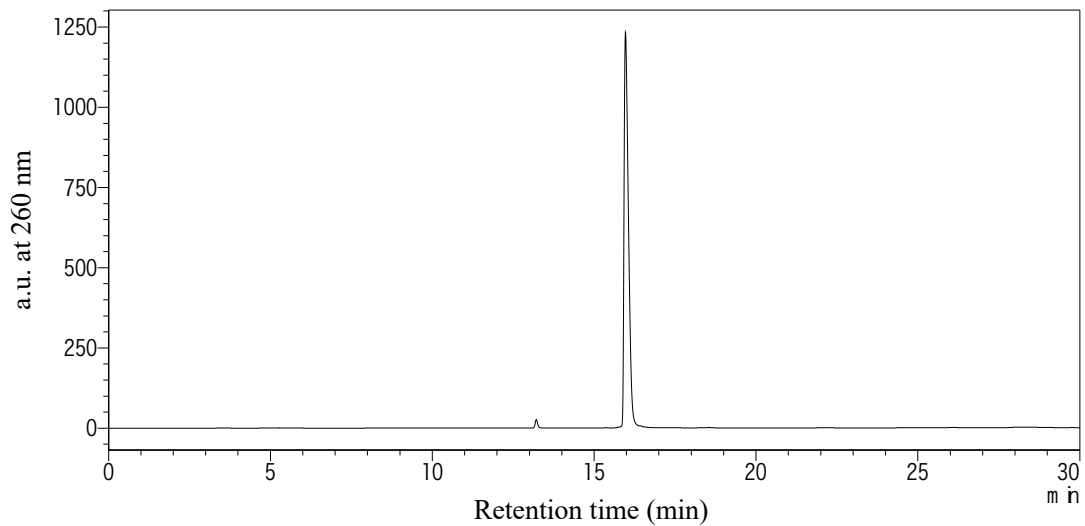

[calcd. (M-H)<sup>-</sup>: 4192.1, found: 4192.6]

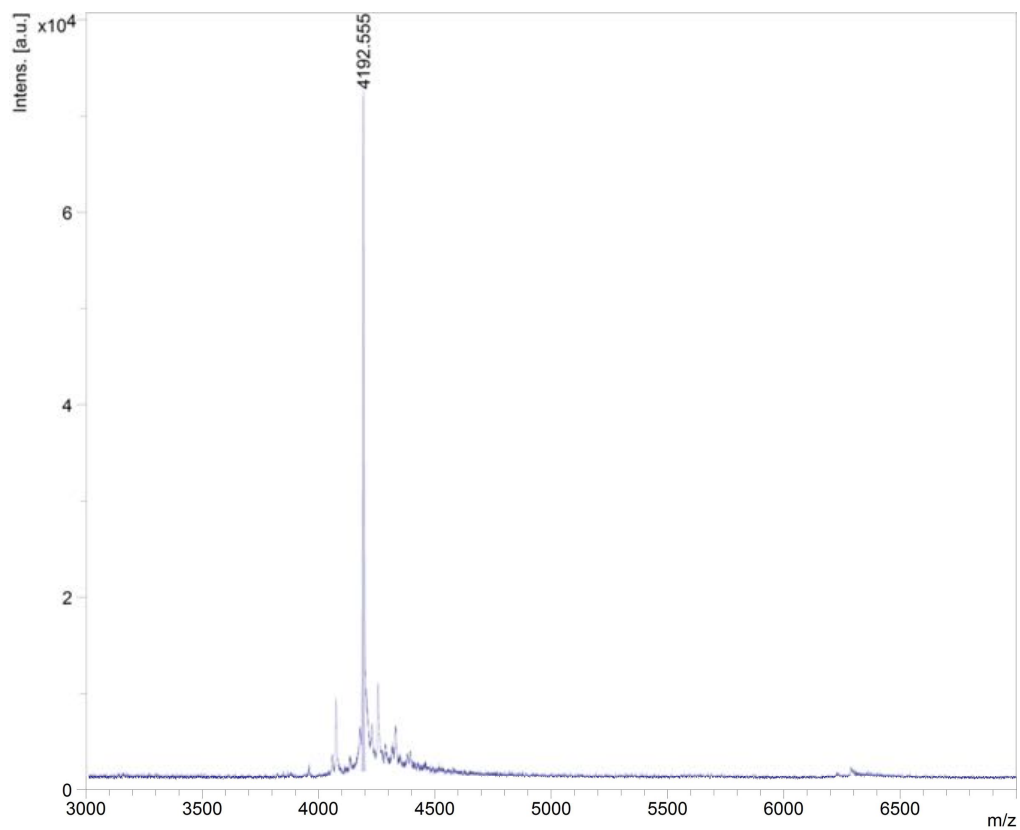

**UD-39**

[B conc. MeCN: 7-40% (30 min)]

mV

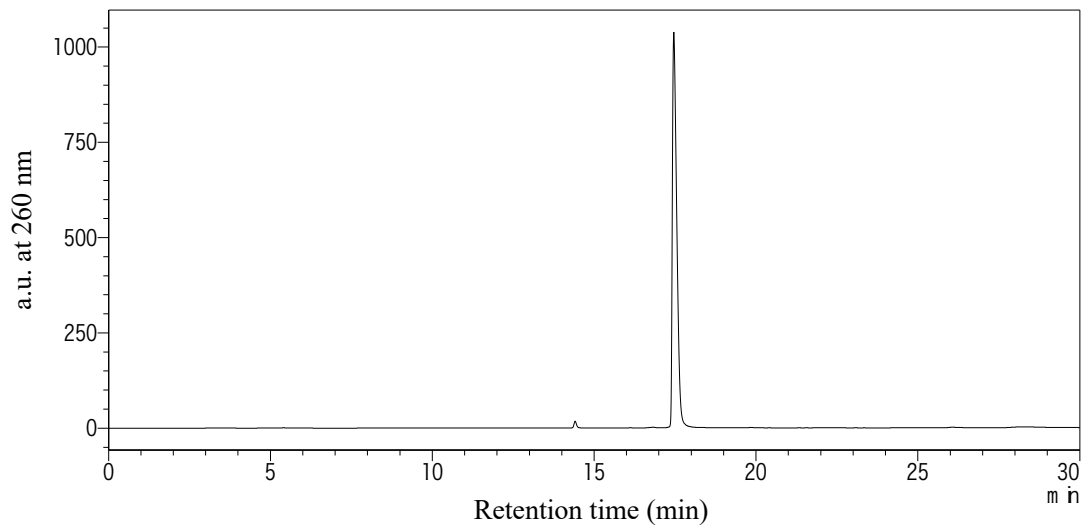

[calcd. (M-H)<sup>-</sup>: 4226.1, found: 4226.3]

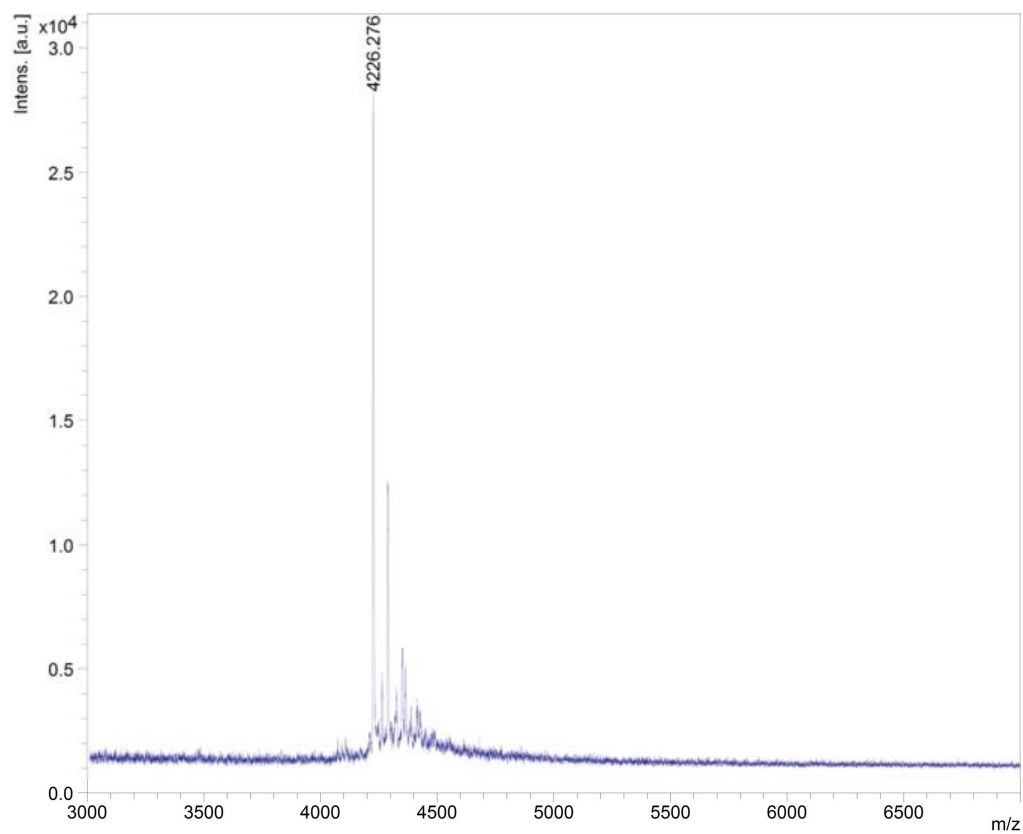



# UD-40

[B conc. MeCN: 7-40% (30 min)]

mV

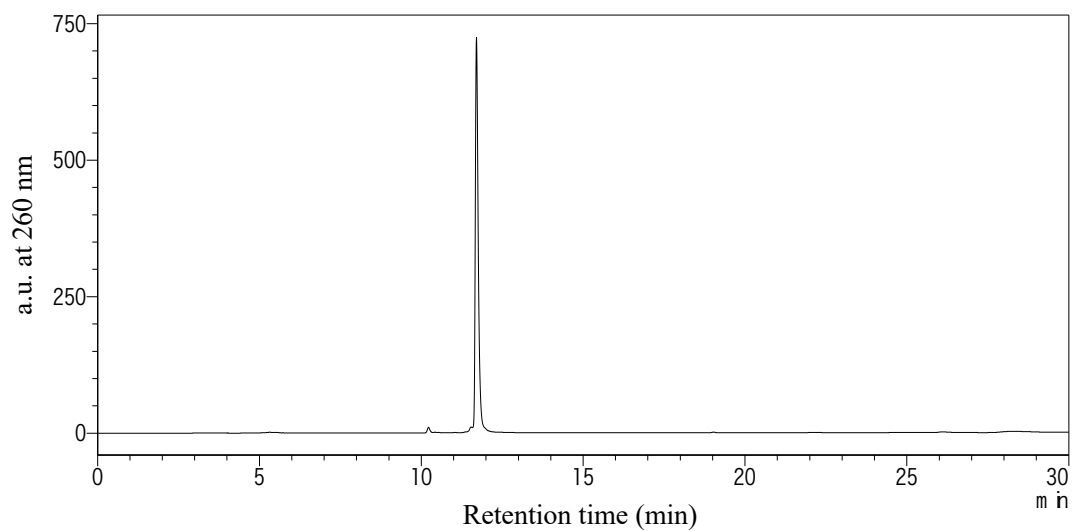

[calcd. (M-H)<sup>-</sup>: 4235.1, found: 4235.1]

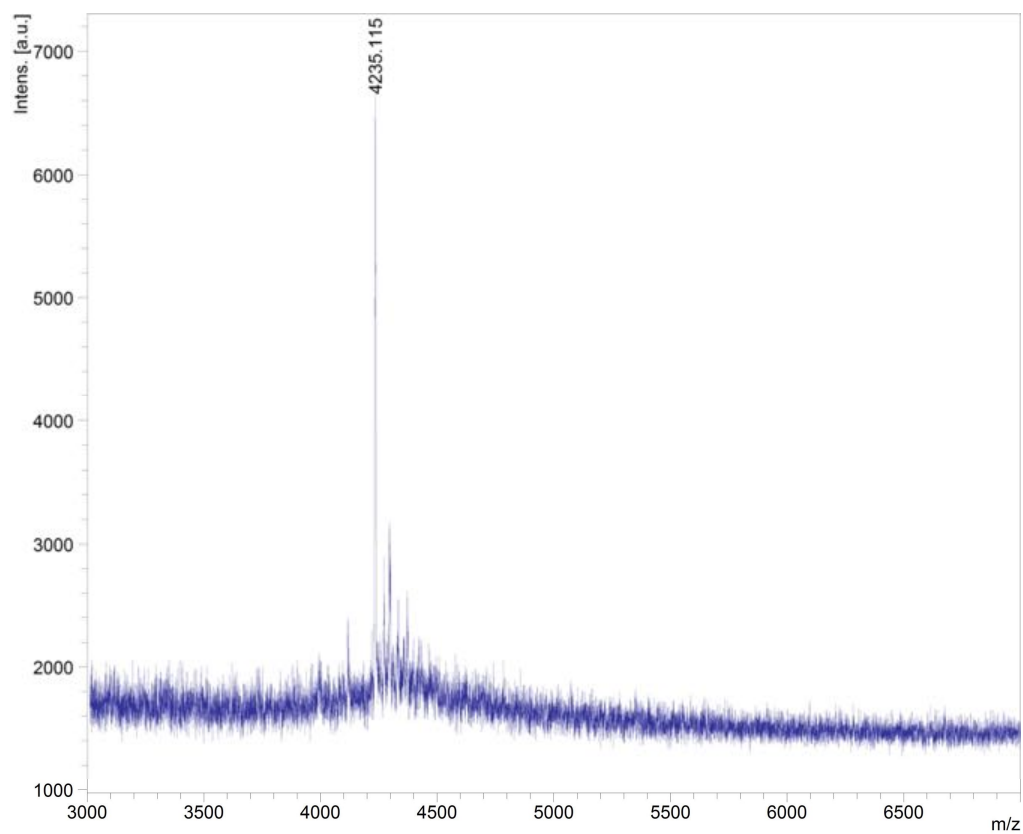

# UD-41

[B conc. MeCN: 7-40% (30 min)]

mV

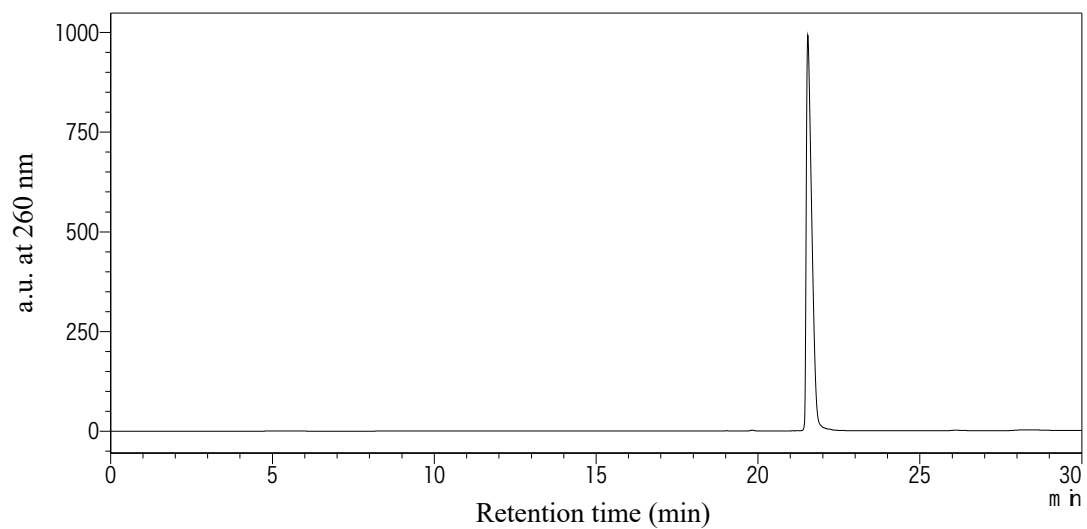

[calcd. (M-H)<sup>-</sup>: 4202.1, found: 4202.1]

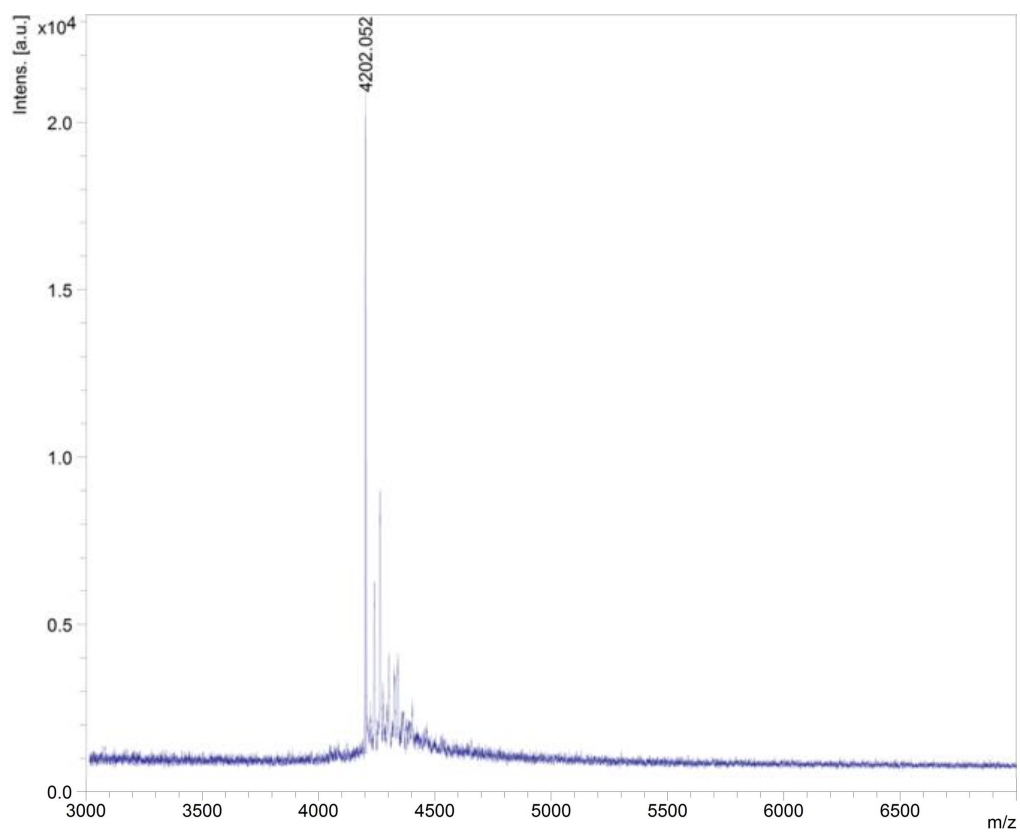

**UD-42**

[B conc. MeCN: 7-40% (30 min)]

mV

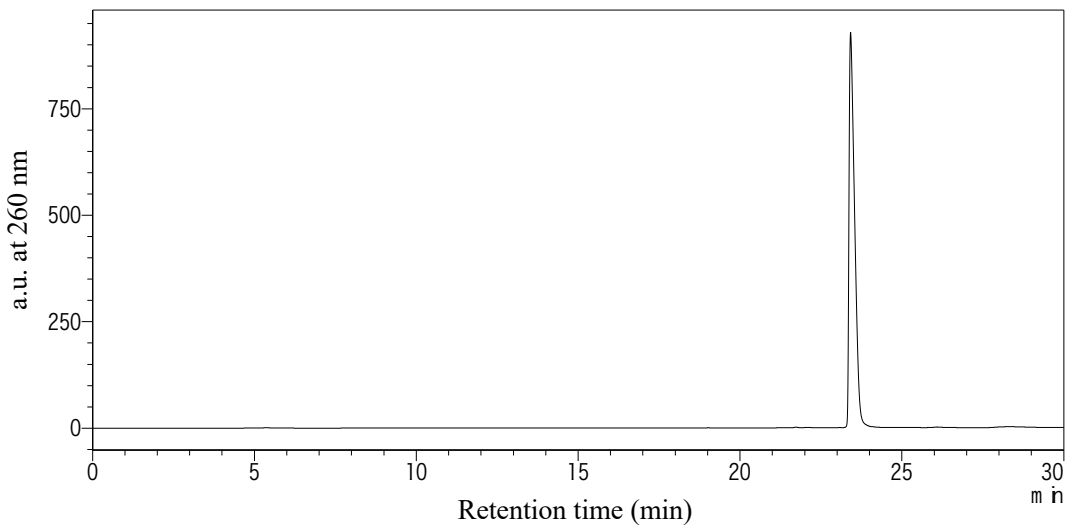

[calcd. (M-H)<sup>-</sup>: 4250.2, found: 4251.2]

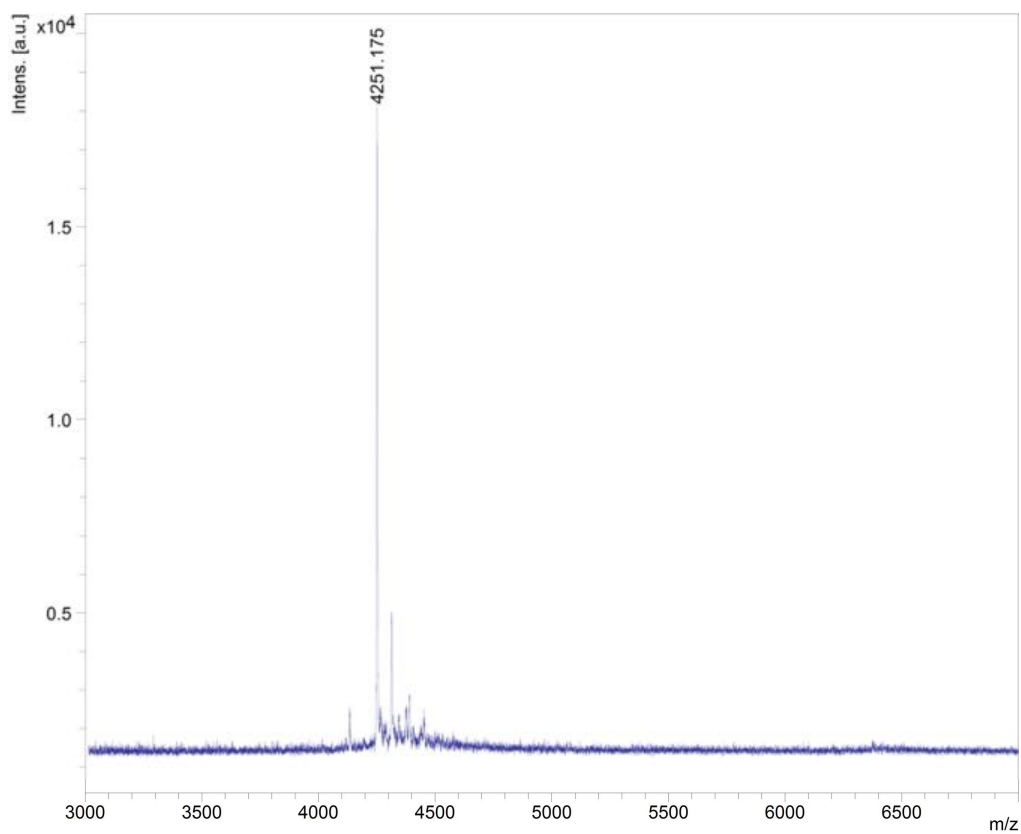

**UD-43**

[B conc. MeCN: 7-40% (30 min)]

mV

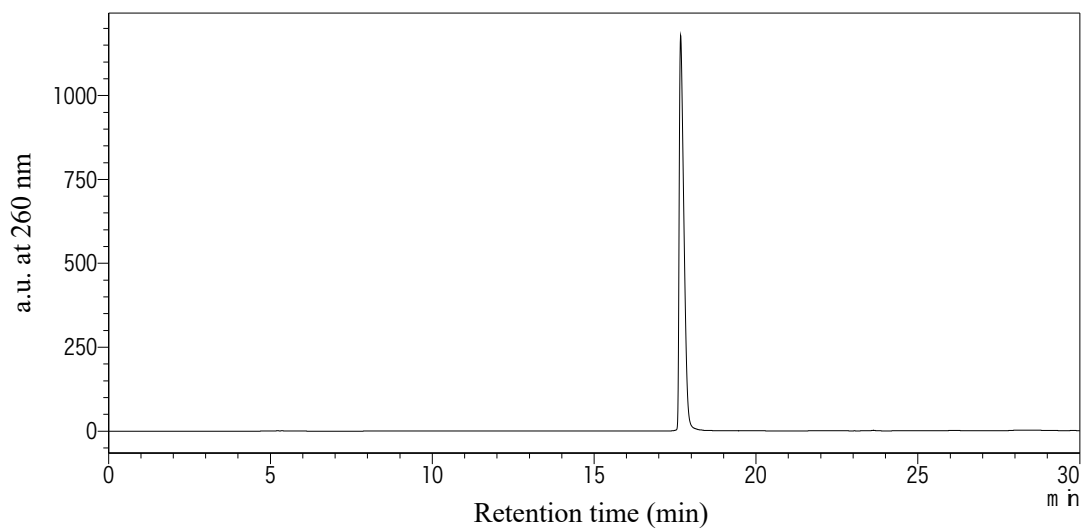

[calcd. (M-H)<sup>-</sup>: 4218.1, found: 4218.8]

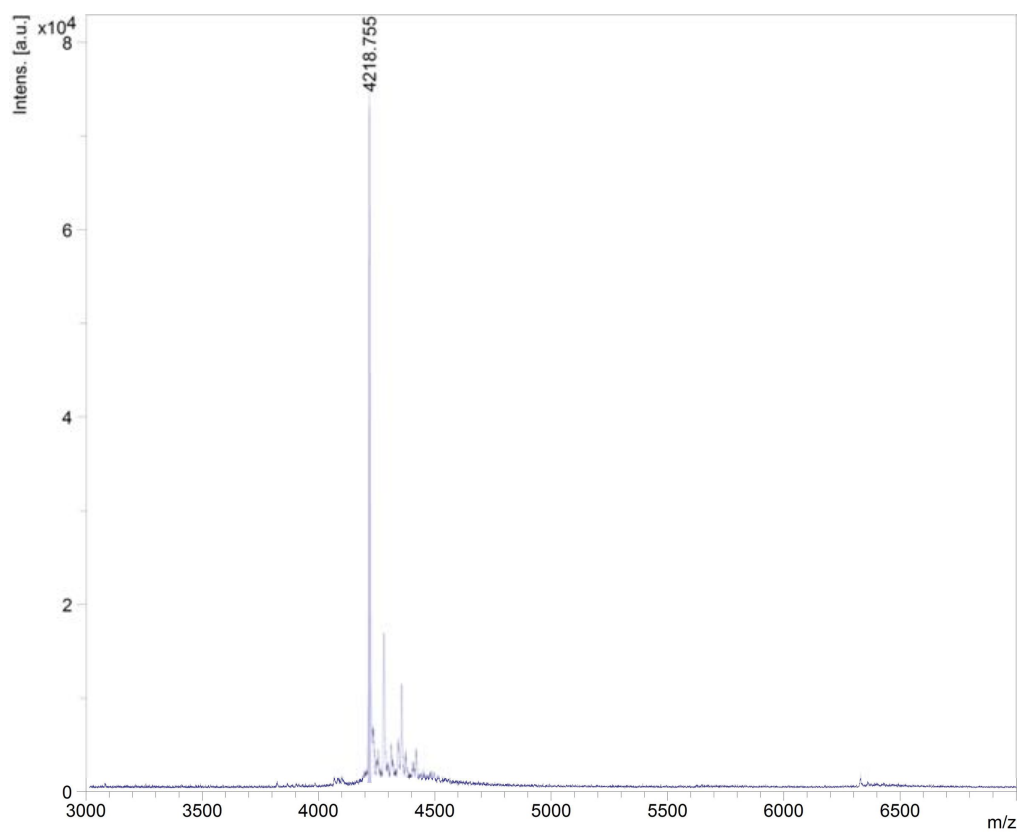

**UD-44**

[B conc. MeCN: 7-40% (30 min)]

mV

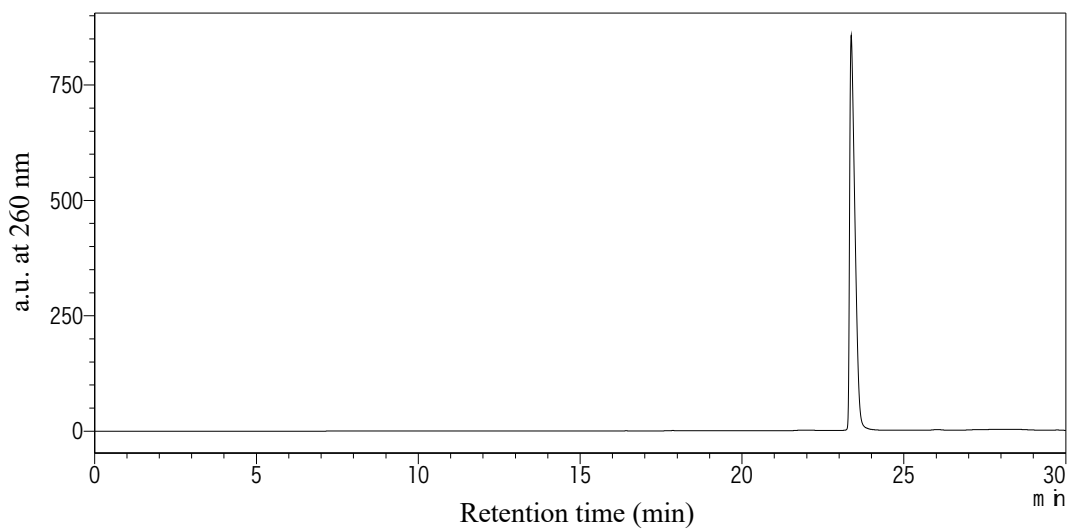

[calcd. (M-H)<sup>-</sup>: 4228.2, found: 4228.2]

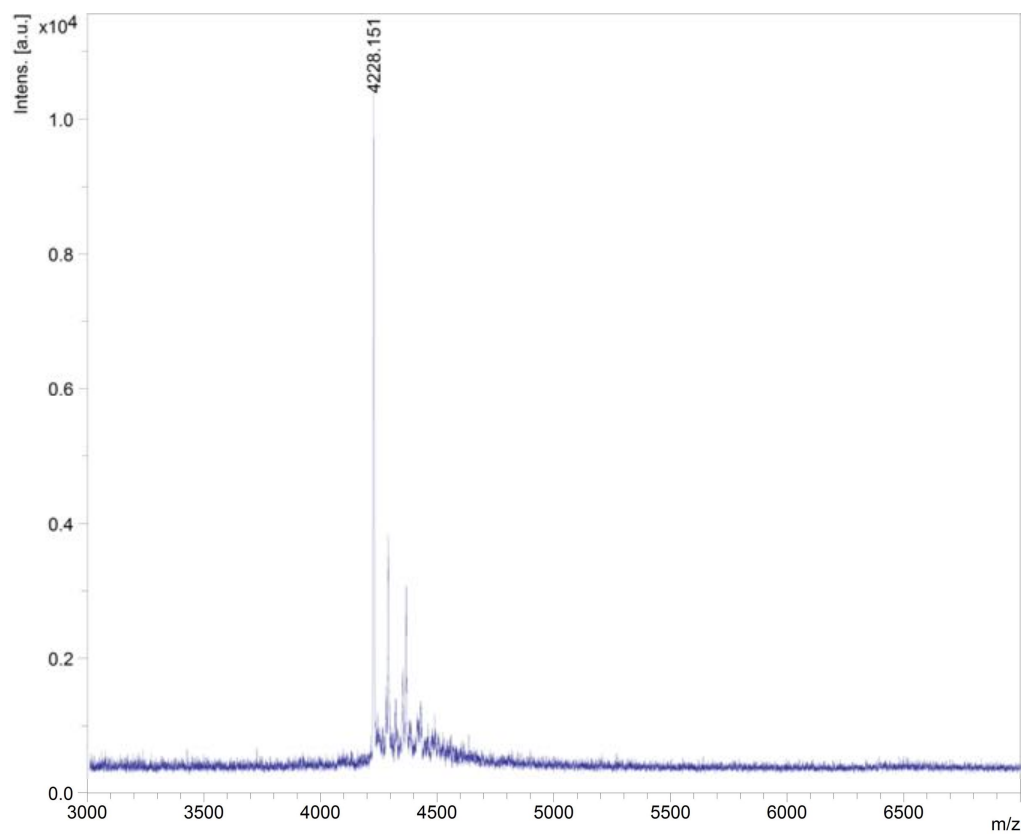

## UD-45

[B conc. MeCN: 7-40% (30 min)]

mV

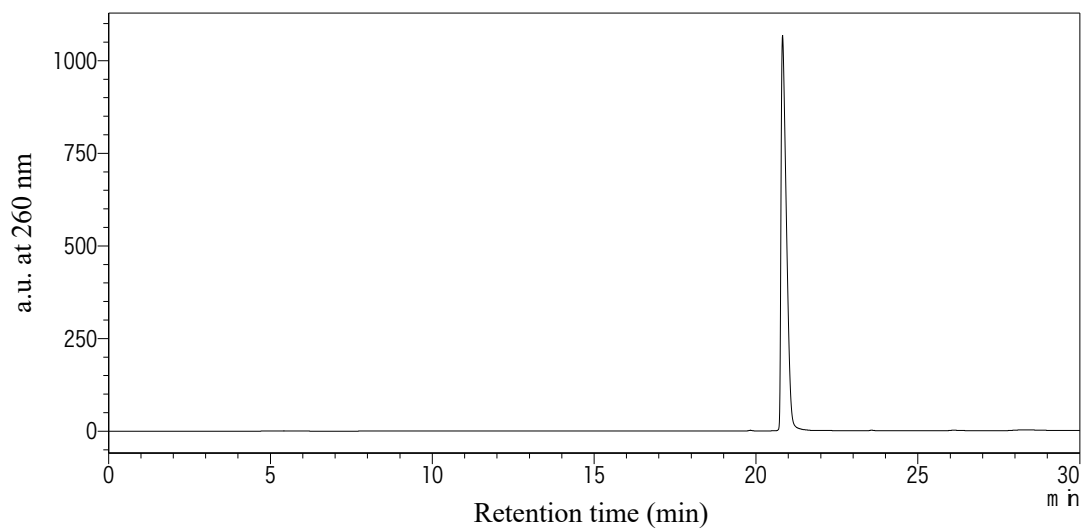

[calcd. (M-H)<sup>-</sup>: 4202.1, found: 4202.6]

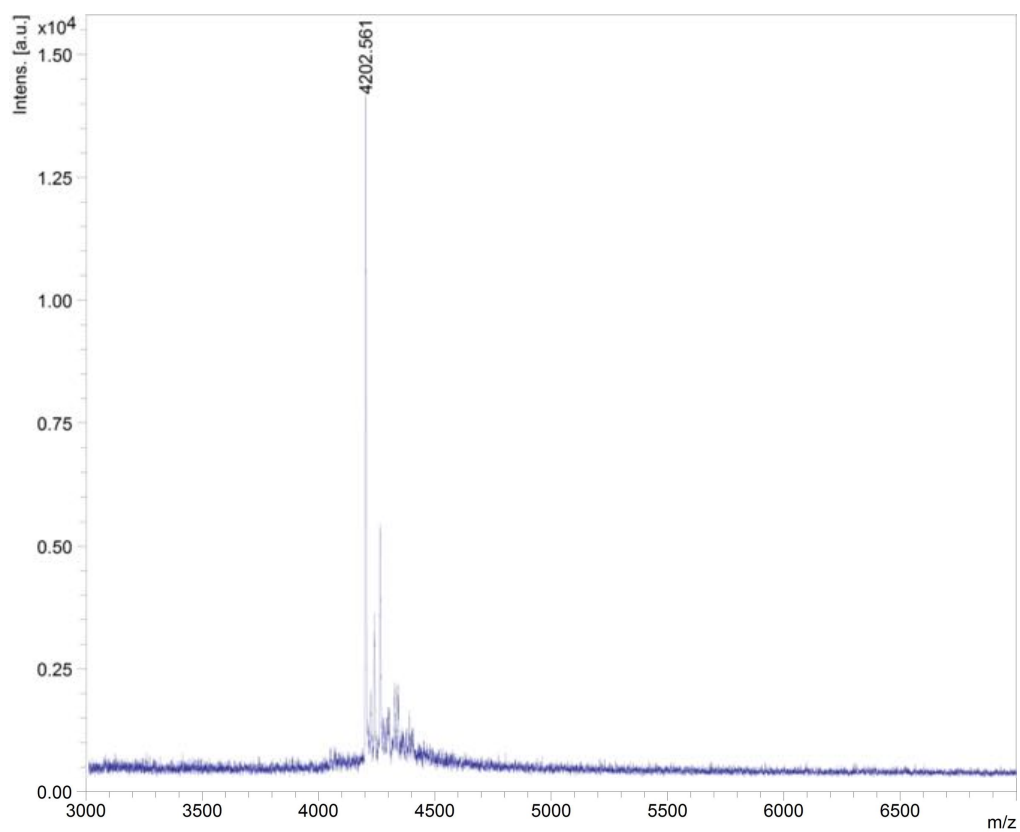

**UD-46**

[B conc. MeCN: 7-40% (30 min)]

mV

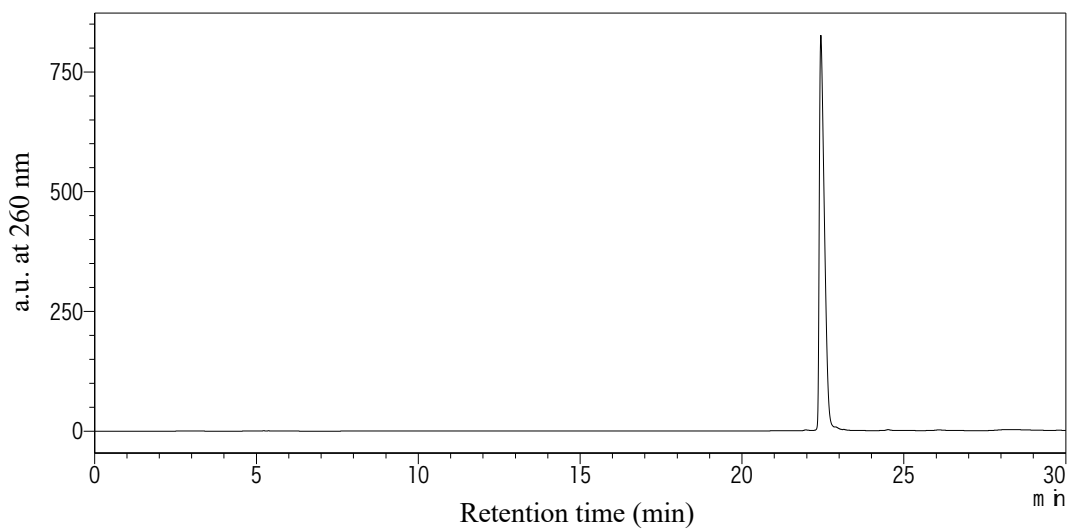

[calcd. (M-H)<sup>-</sup>: 4236.1, found: 4237.9]

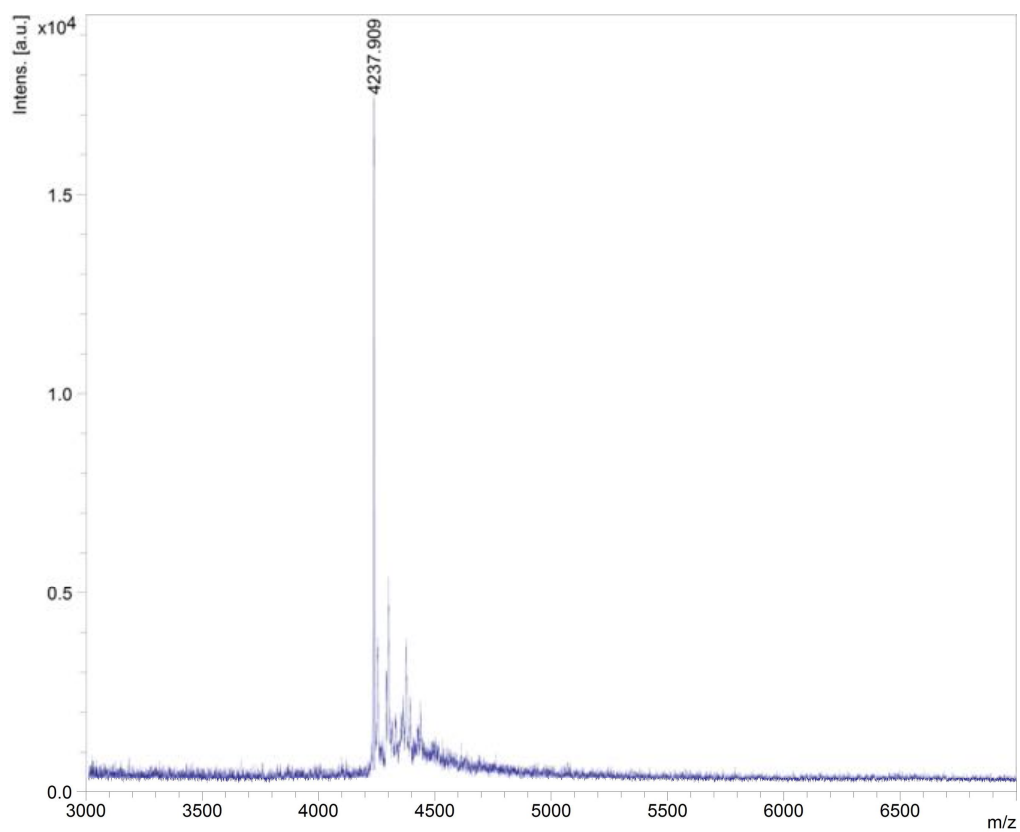

**UD-47**

[B conc. MeCN: 7-40% (30 min)]

mV

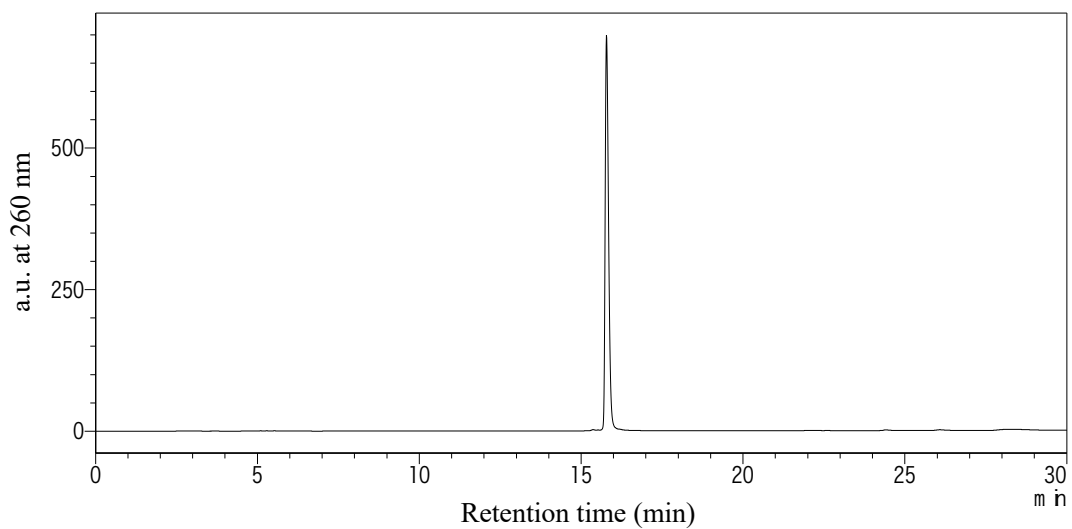

[calcd. (M-H)<sup>-</sup>: 4245.2, found: 4245.6]

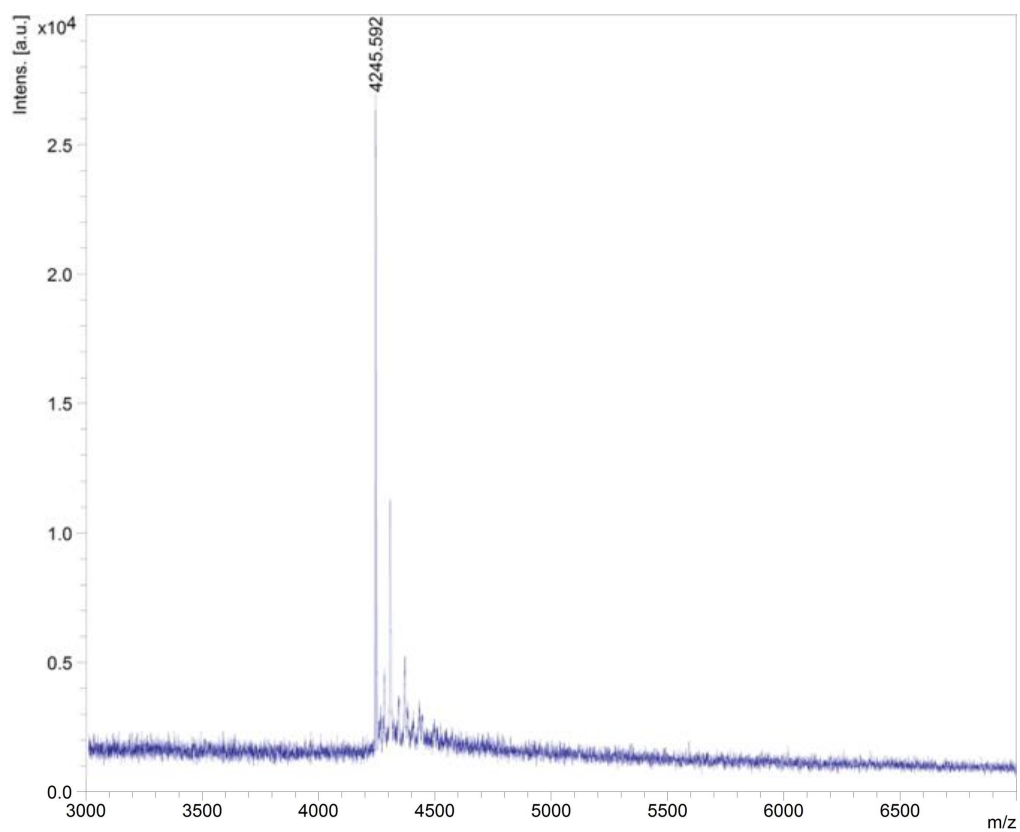



# UD-48

[B conc. MeCN: 7-40% (30 min)]

mV

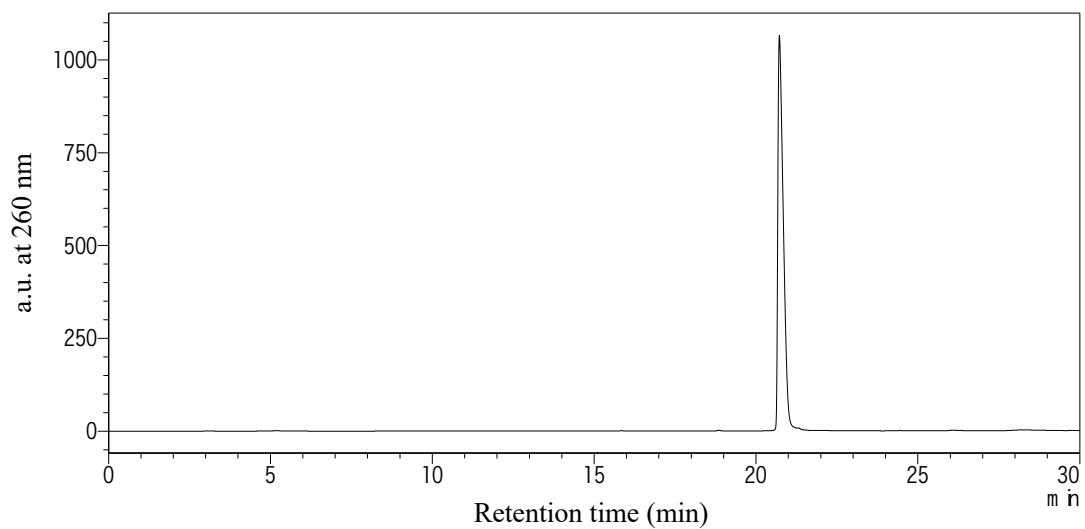

[calcd. (M-H)<sup>-</sup>: 4210.1, found: 4211.4]

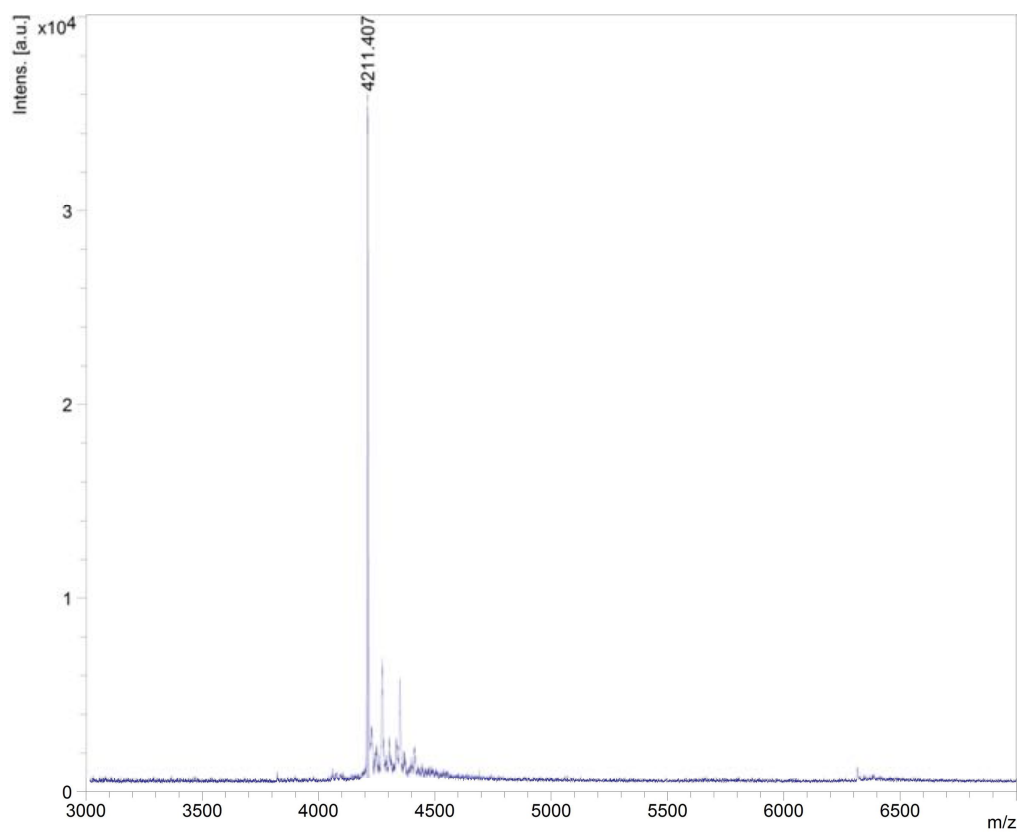

**UD-49**

[B conc. MeCN: 7-40% (30 min)]

mV

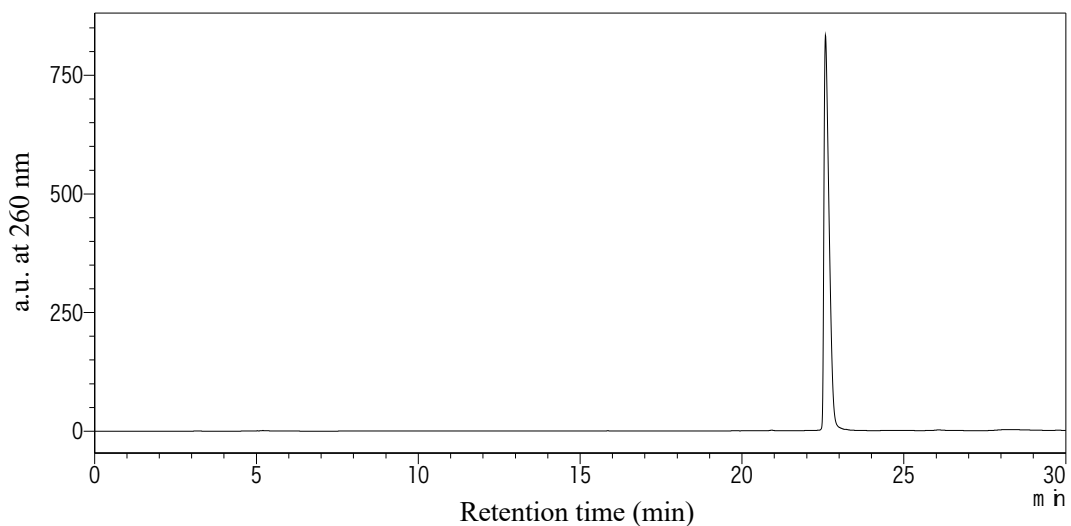

[calcd. (M-H)<sup>-</sup>: 4258.2, found: 4258.4]

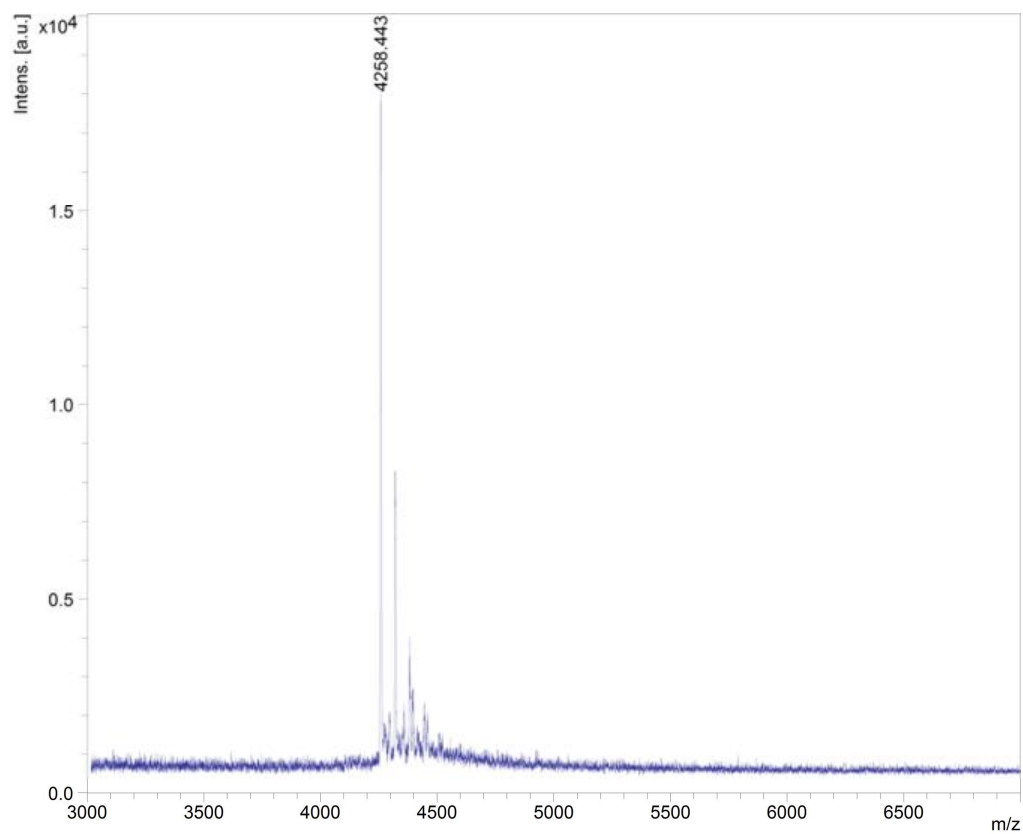

**UD-50**

[B conc. MeCN: 7-40% (30 min)]

mV

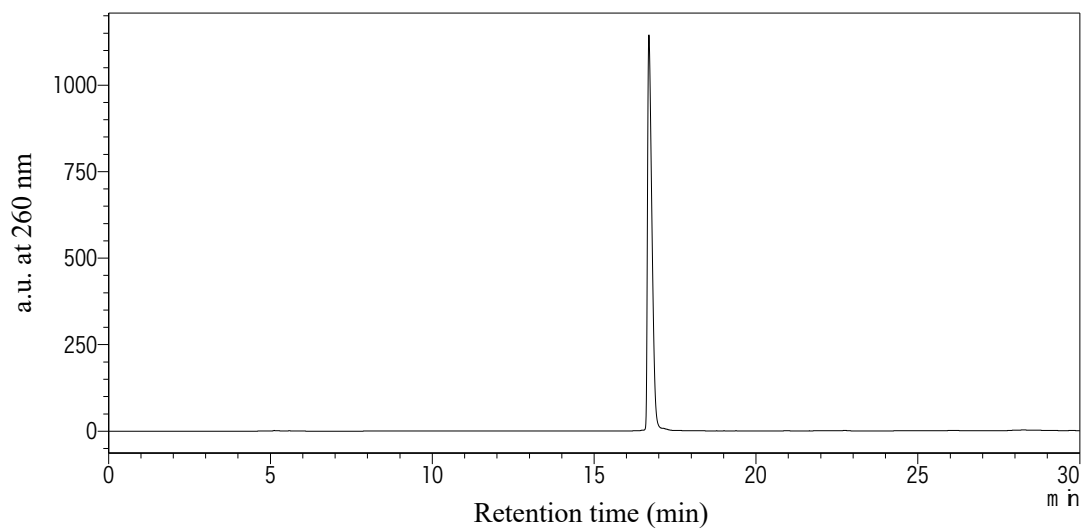

[calcd. (M-H)<sup>-</sup>: 4226.1, found: 4226.8]

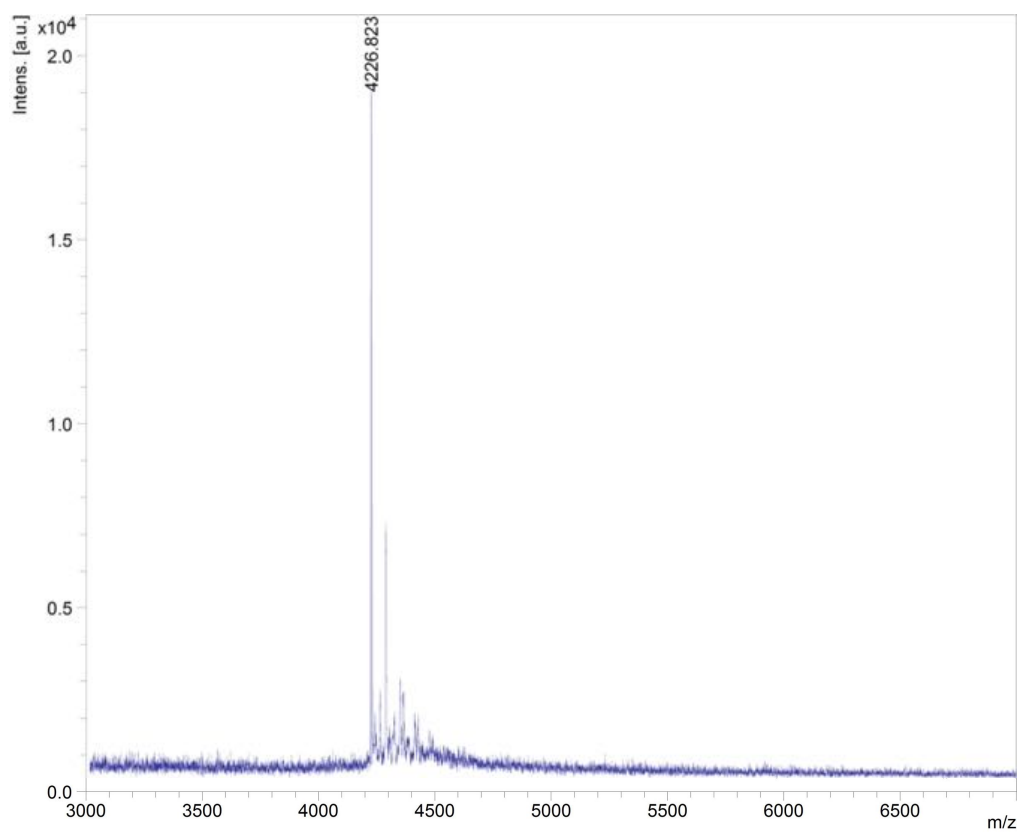

**UD-51**

[B conc. MeCN: 7-40% (30 min)]

mV

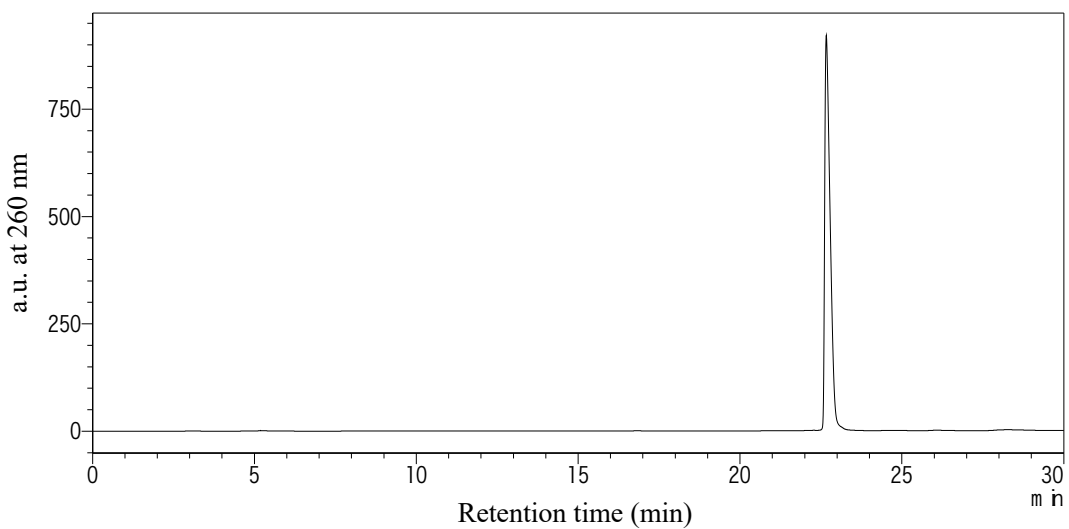

[calcd. (M-H)<sup>-</sup>: 4236.1, found: 4236.5]

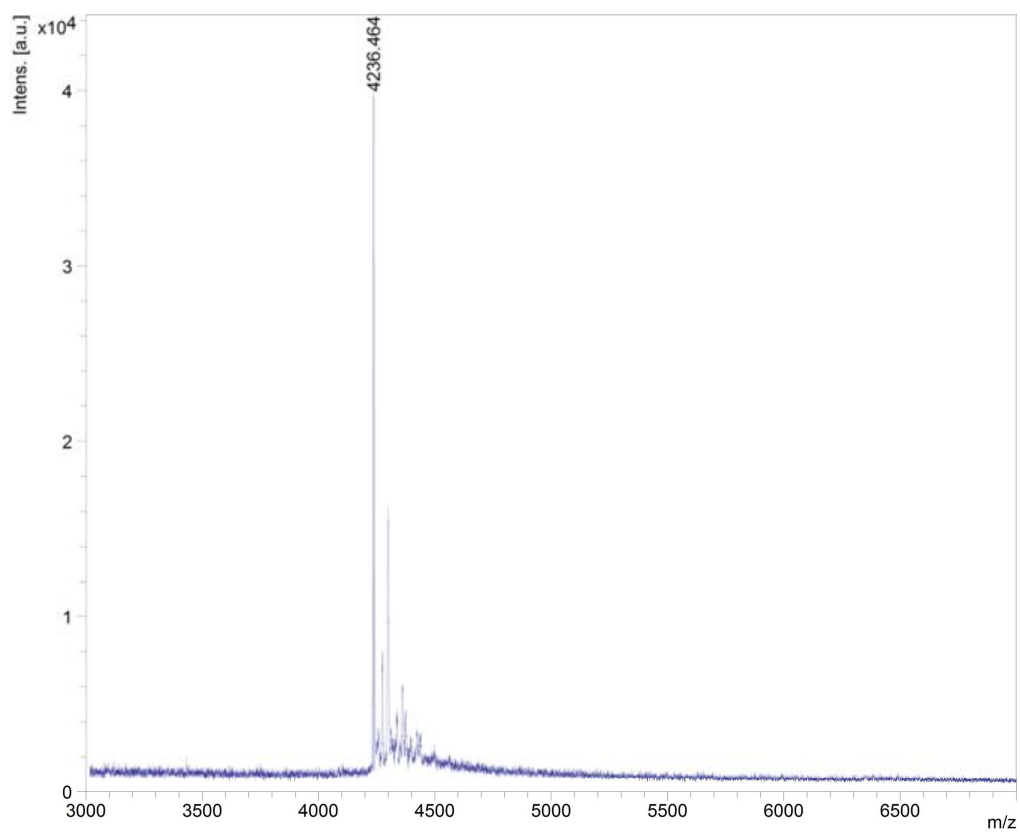

**UD-52**

[B conc. MeCN: 7-40% (30 min)]

mV

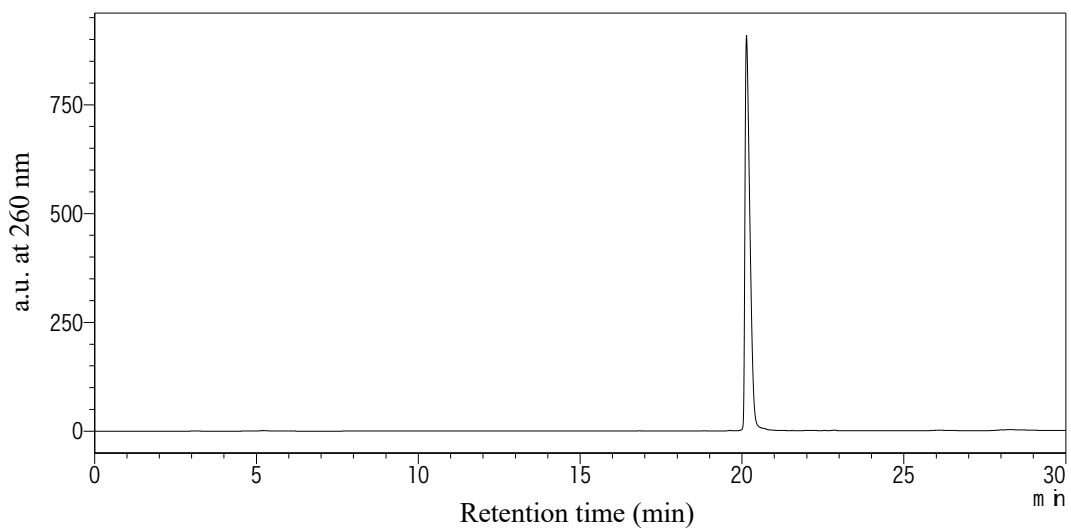

[calcd. (M-H)<sup>-</sup>: 4210.1, found: 4210.7]

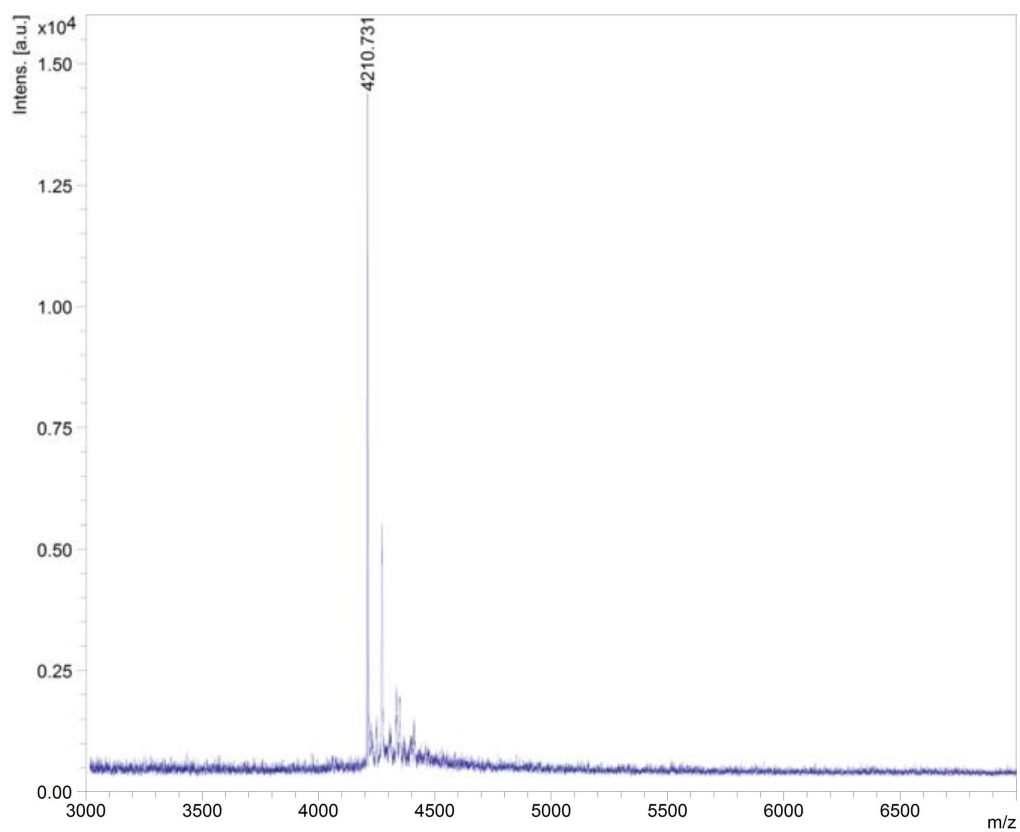

**UD-53**

[B conc. MeCN: 7-40% (30 min)]

mV

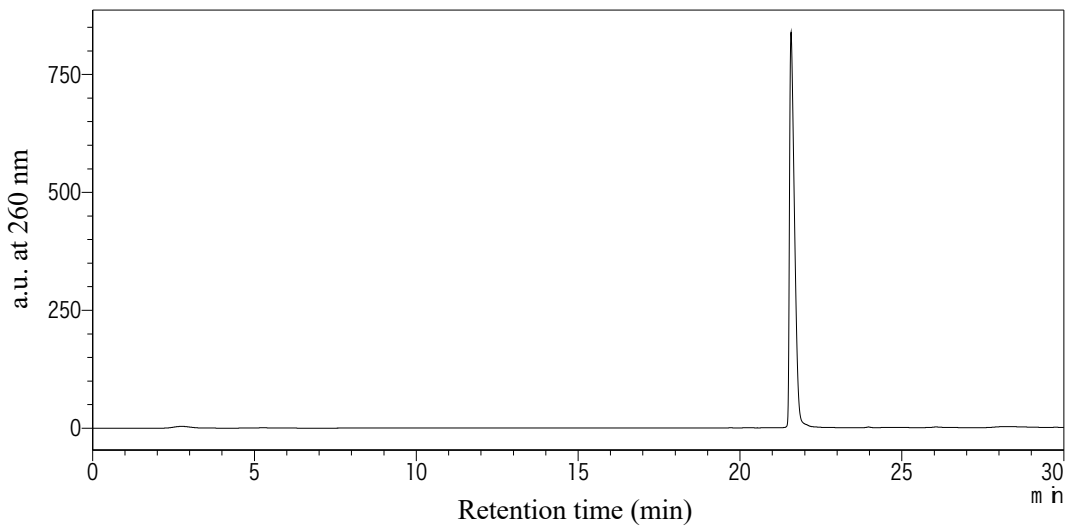

[calcd. (M-H)<sup>-</sup>: 4244.1, found: 4244.6]

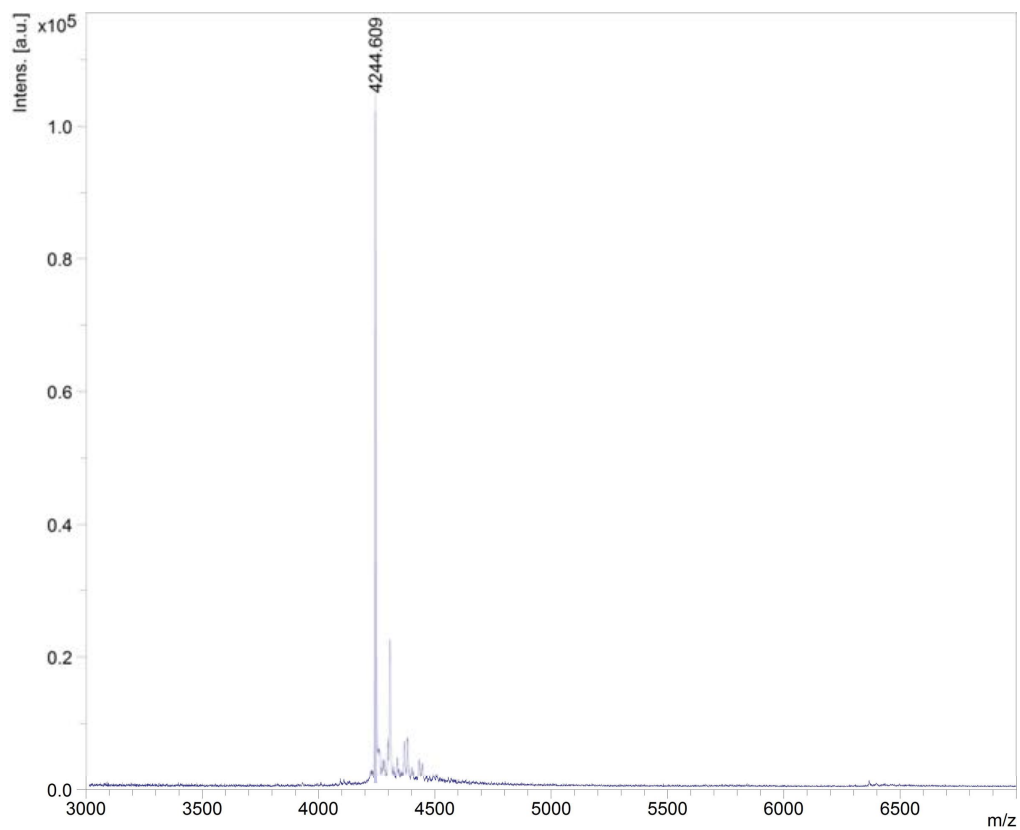

**UD-54**

[B conc. MeCN: 7-40% (30 min)]

mV

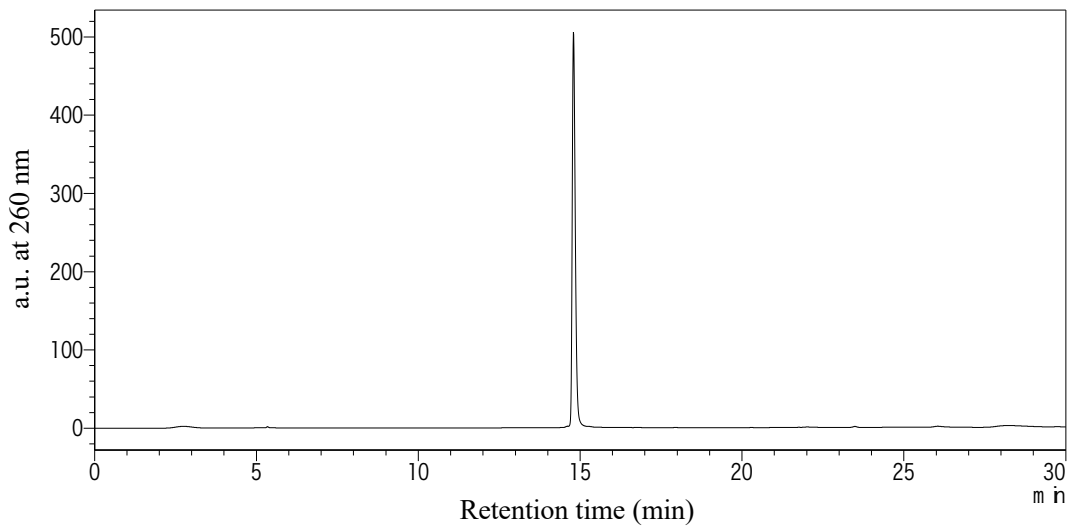

[calcd. (M-H)<sup>-</sup>: 4253.2, found: 4253.3]

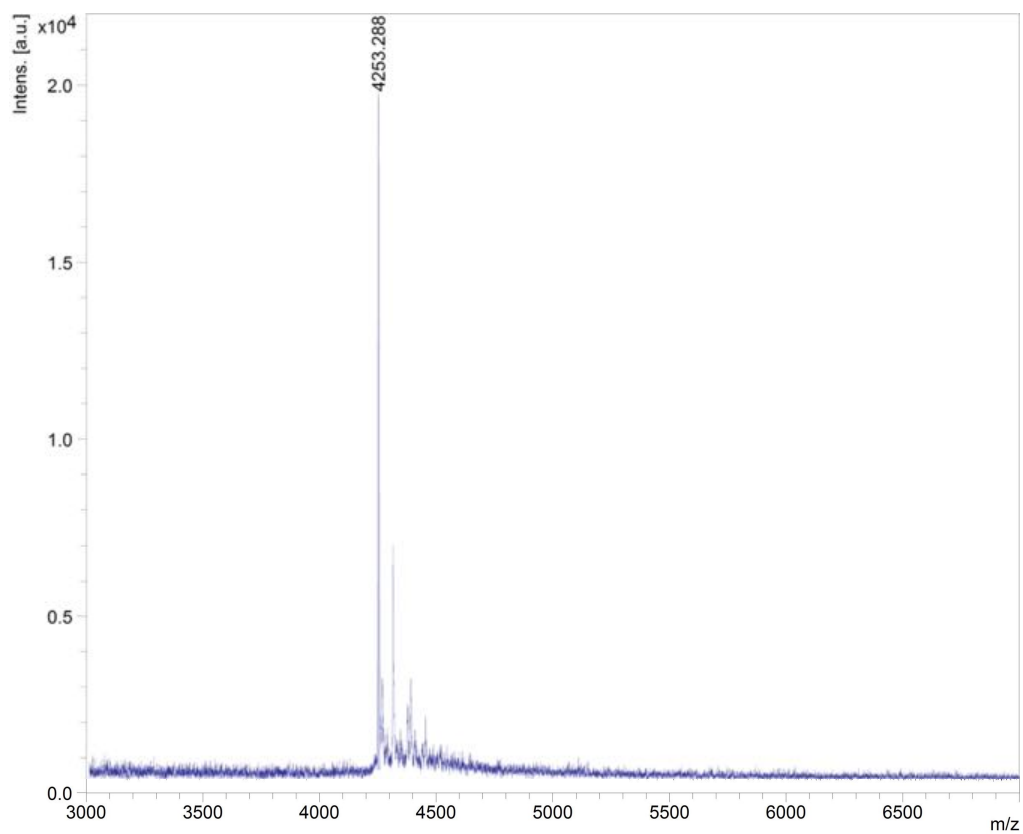

**UD-55**

[B conc. MeCN: 7-40% (30 min)]

mV

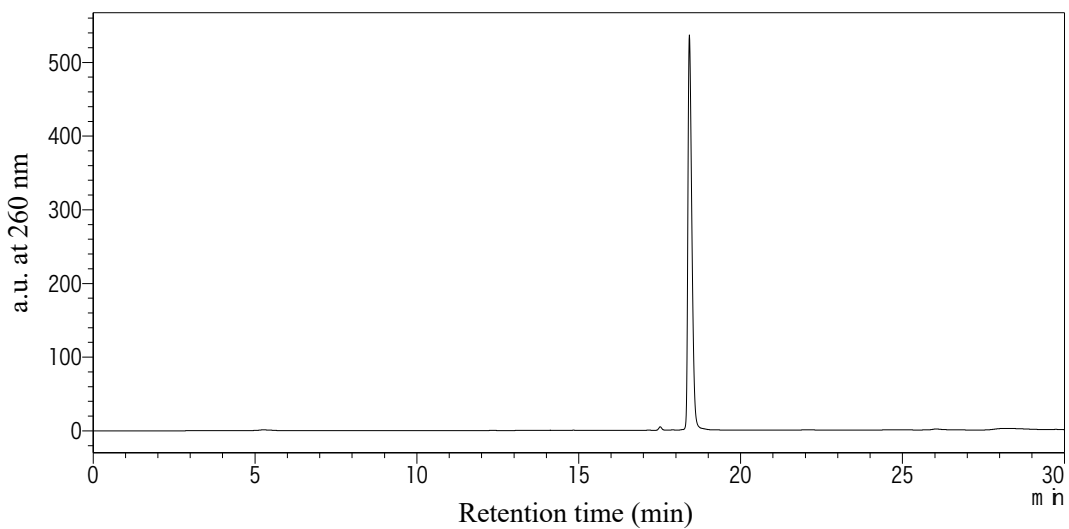

[calcd. (M-H)<sup>-</sup>: 4146.0, found: 4146.2]

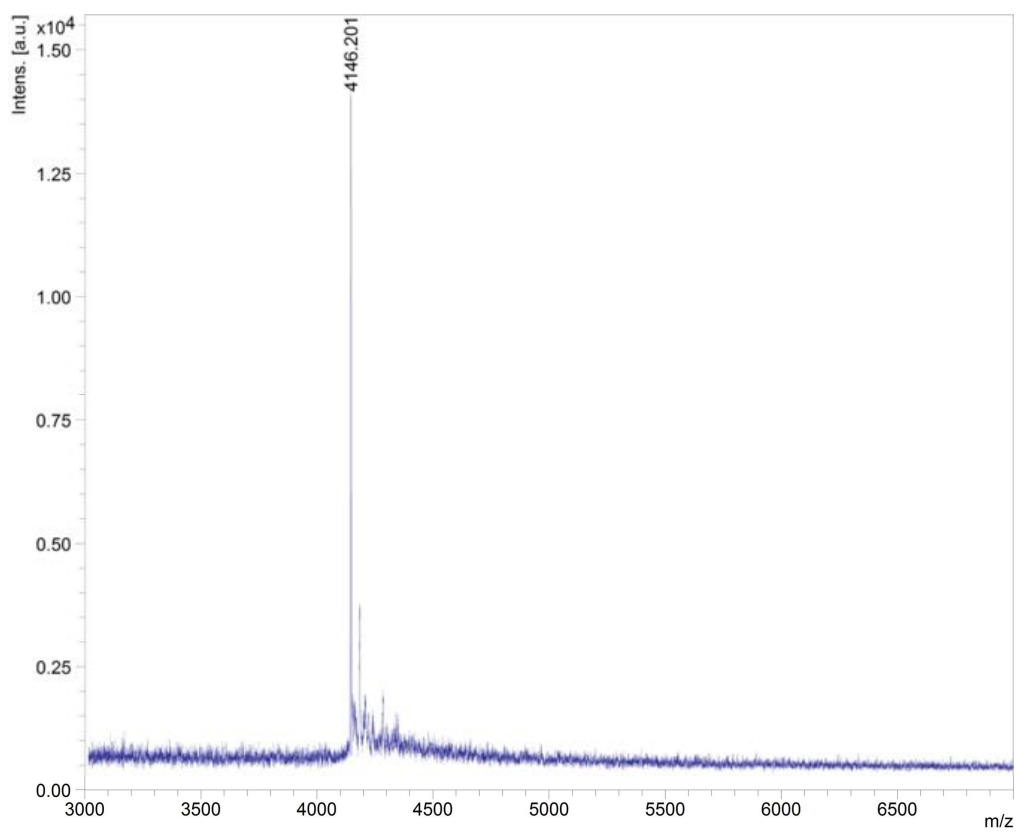



**UD-56**

[B conc. ACN: 7-40% (30 min)]

mV

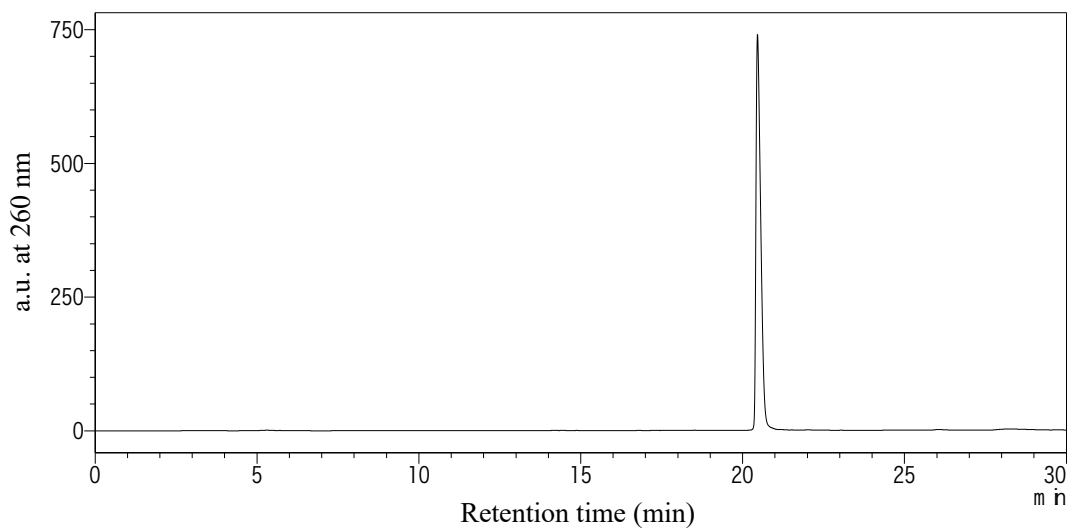

[calcd. (M-H)<sup>-</sup>: 4194.1, found: 4194.3]

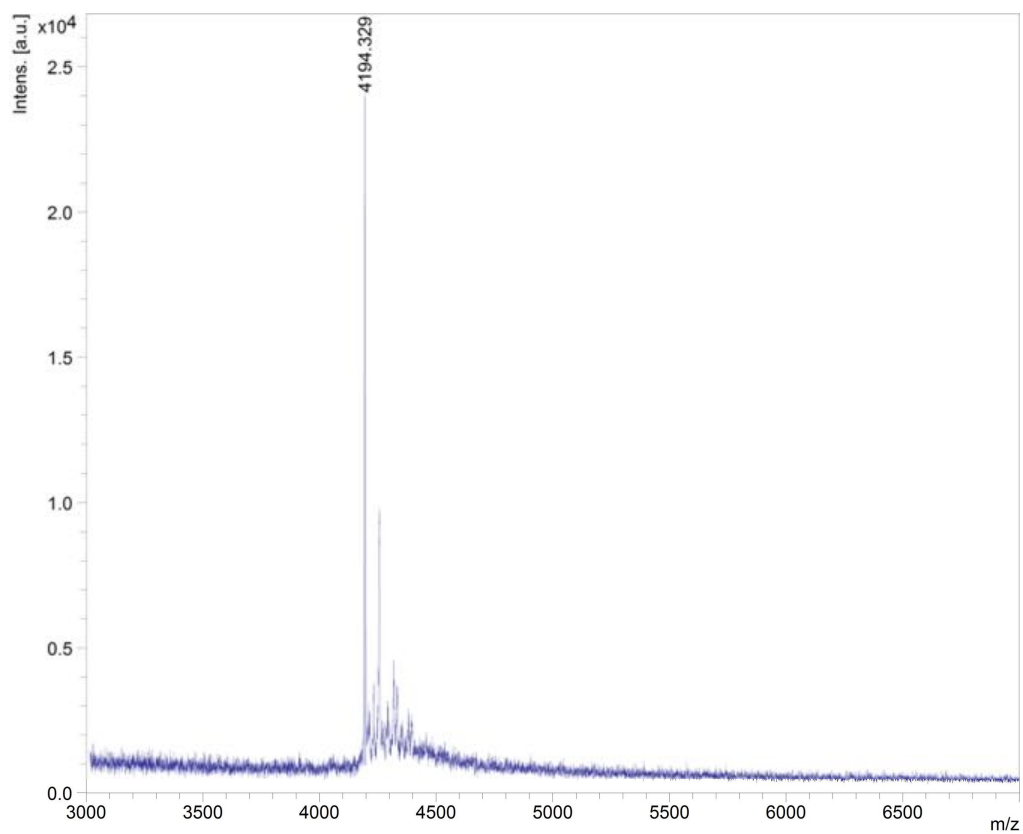

**UD-57**

[B conc. MeCN: 7-40% (30 min)]

mV

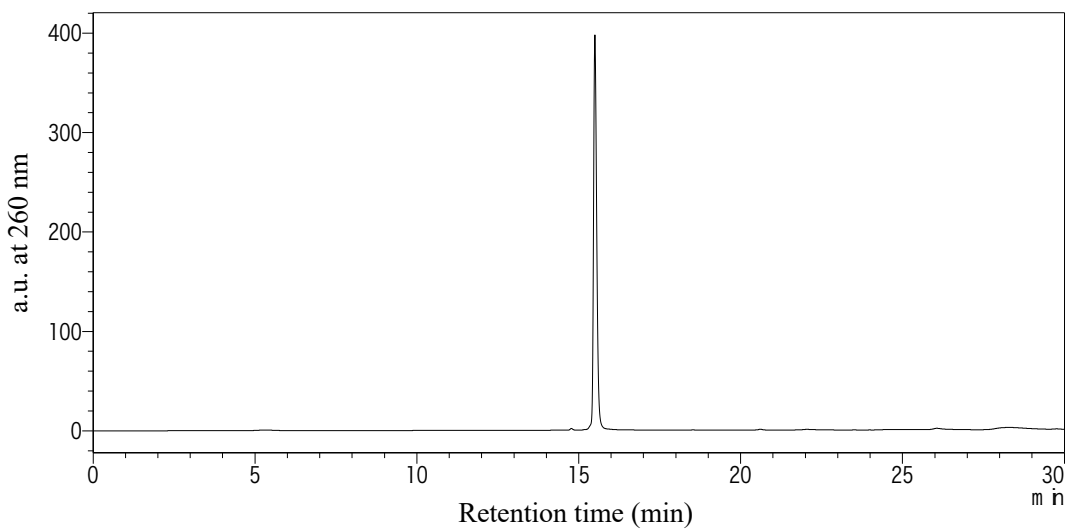

[calcd. (M-H)<sup>-</sup>: 4162.0, found: 4162.5]

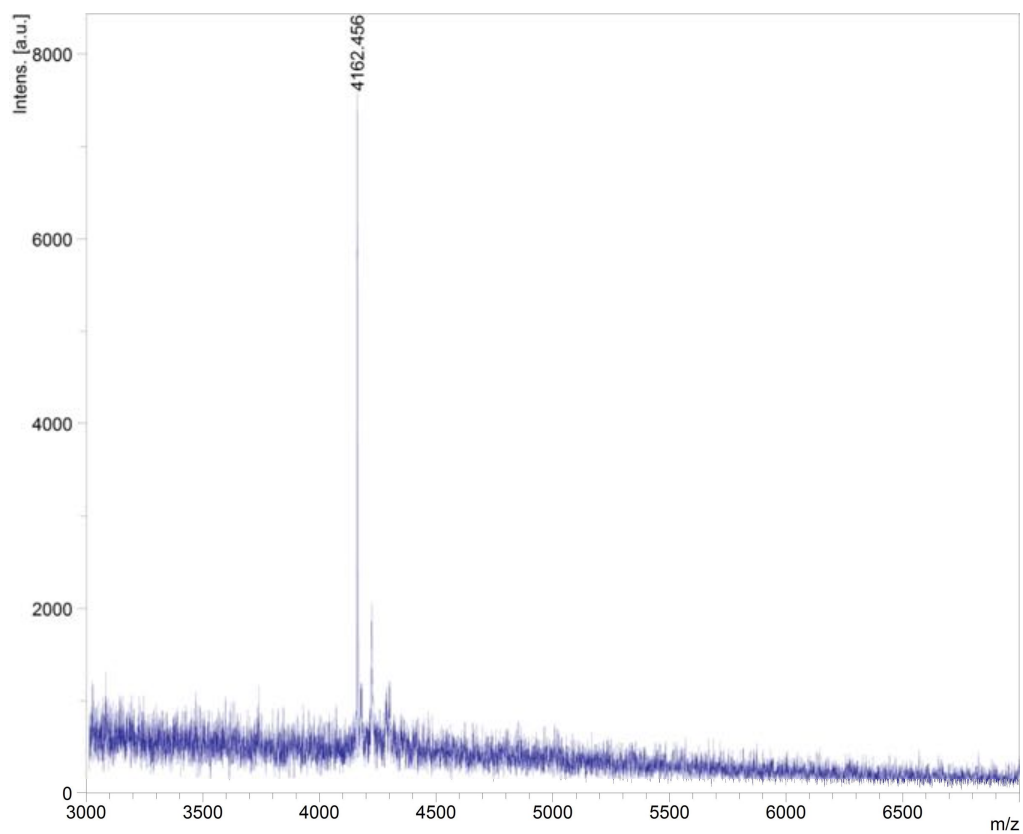

**UD-58**

[B conc. MeCN: 7-40% (30 min)]

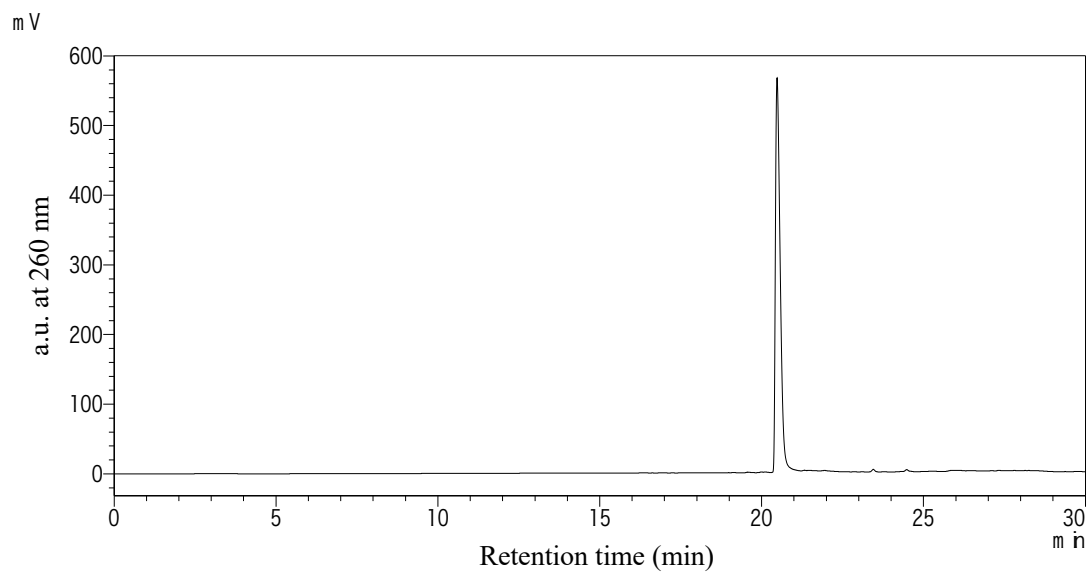

[calcd. (M-H)<sup>-</sup>: 4172.1, found: 4172.3]

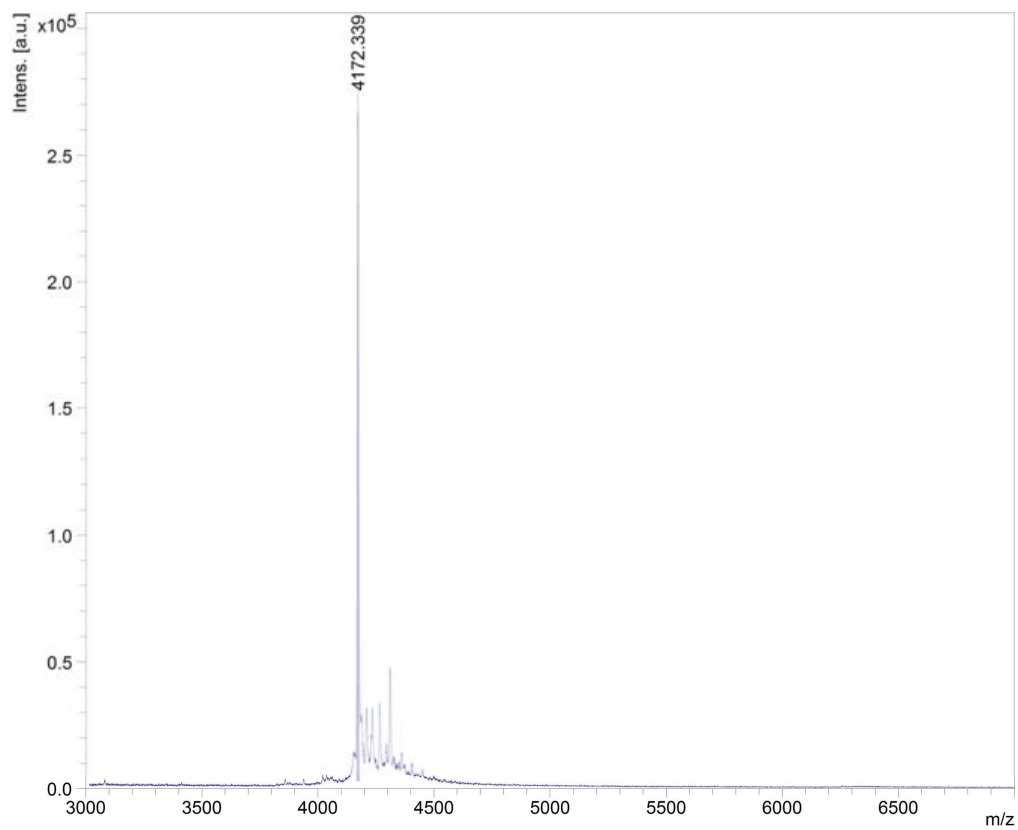

**UD-59**

[B conc. MeCN: 7-40% (30 min)]

mV

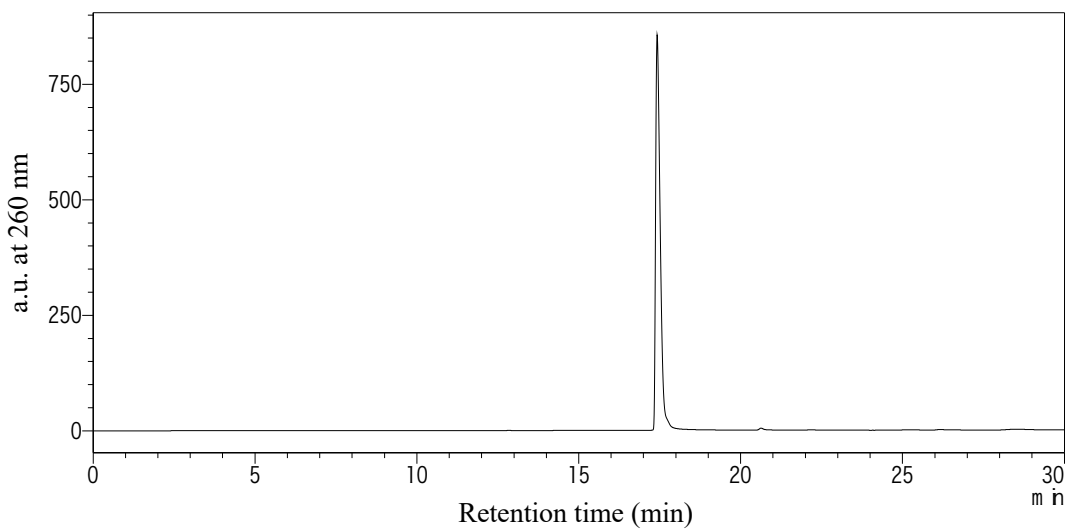

[calcd. (M-H)<sup>-</sup>: 4146.0, found: 4146.2]

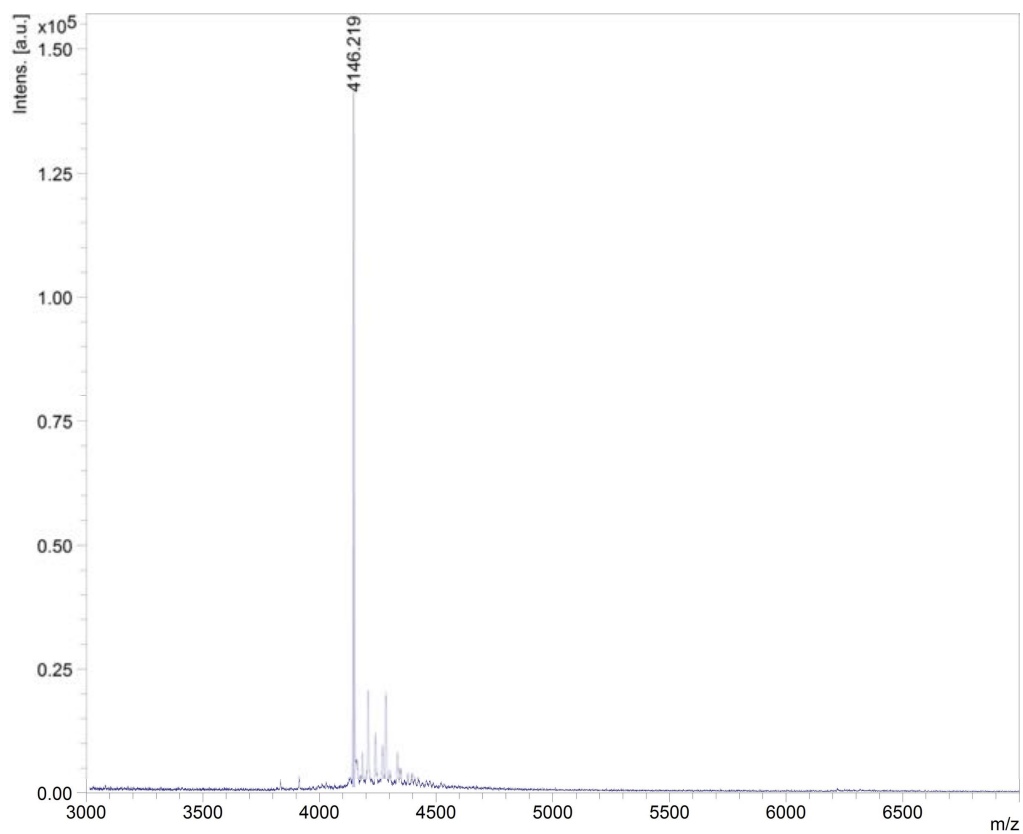

**UD-60**

[B conc. MeCN: 7-40% (30 min)]

mV

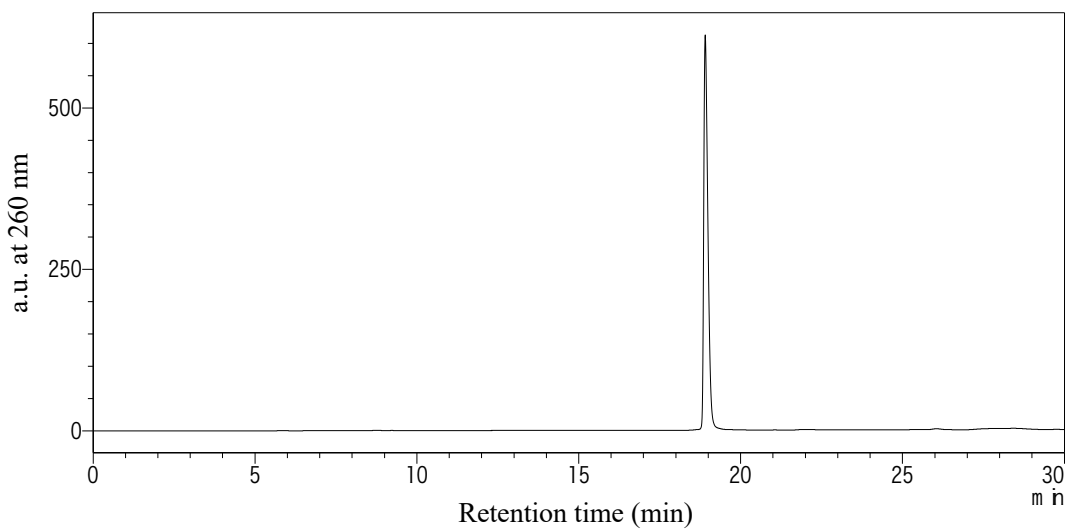

[calcd. (M-H)<sup>-</sup>: 4180.0, found: 4180.6]

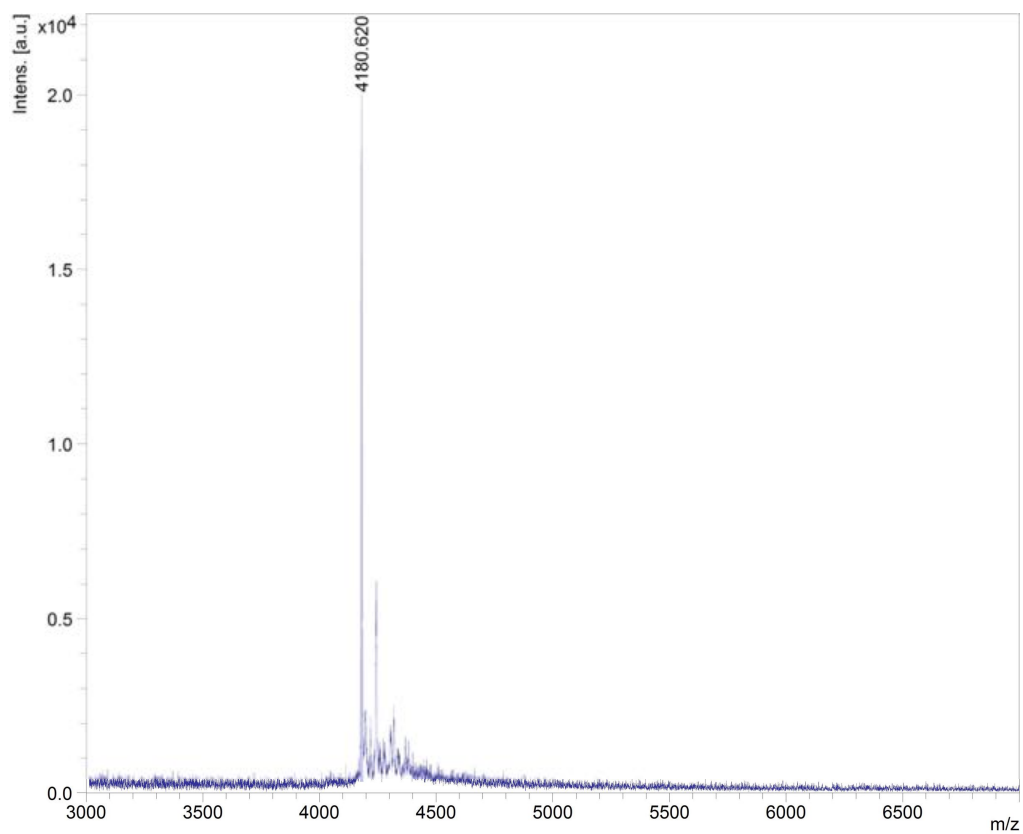

**UD-61**

[B conc. MeCN: 7-40% (30 min)]

mV

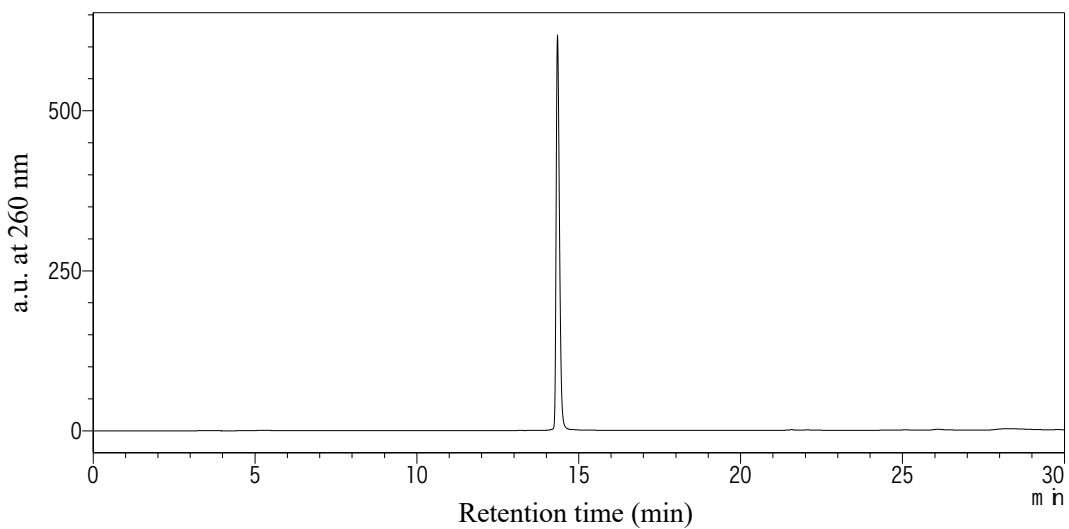

[calcd. (M-H)<sup>-</sup>: 4189.1, found: 4189.0]

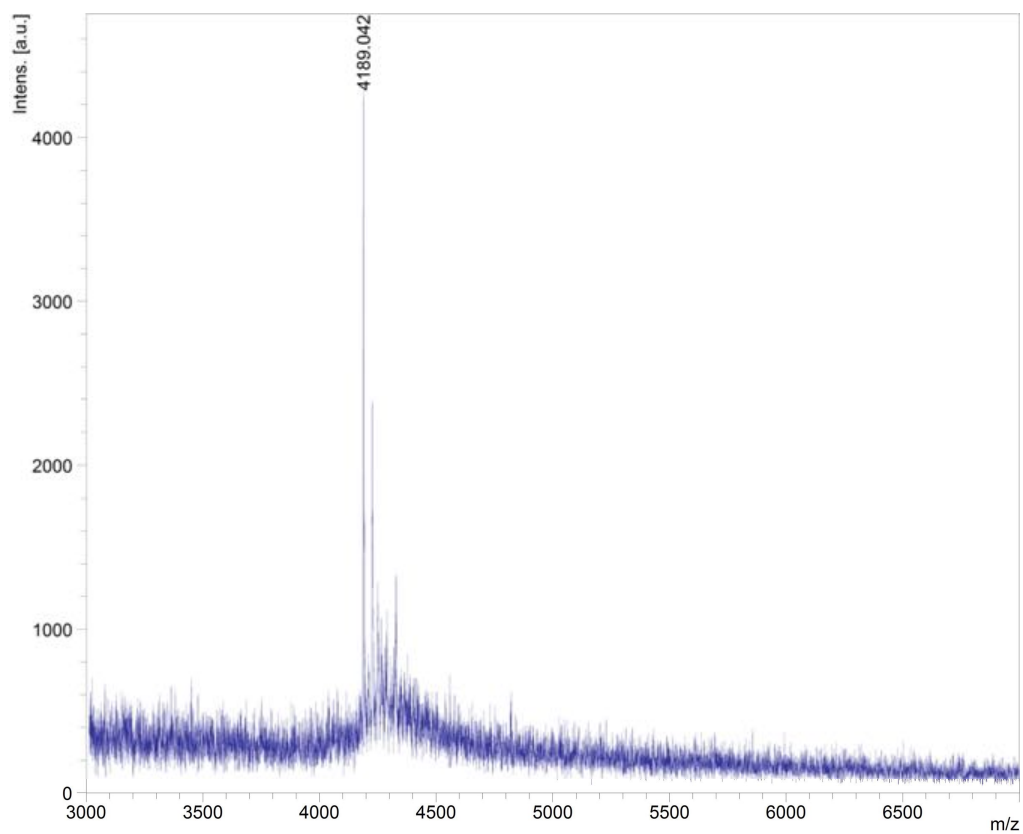

**UD-62**

[B conc. MeCN: 7-40% (30 min)]

mV

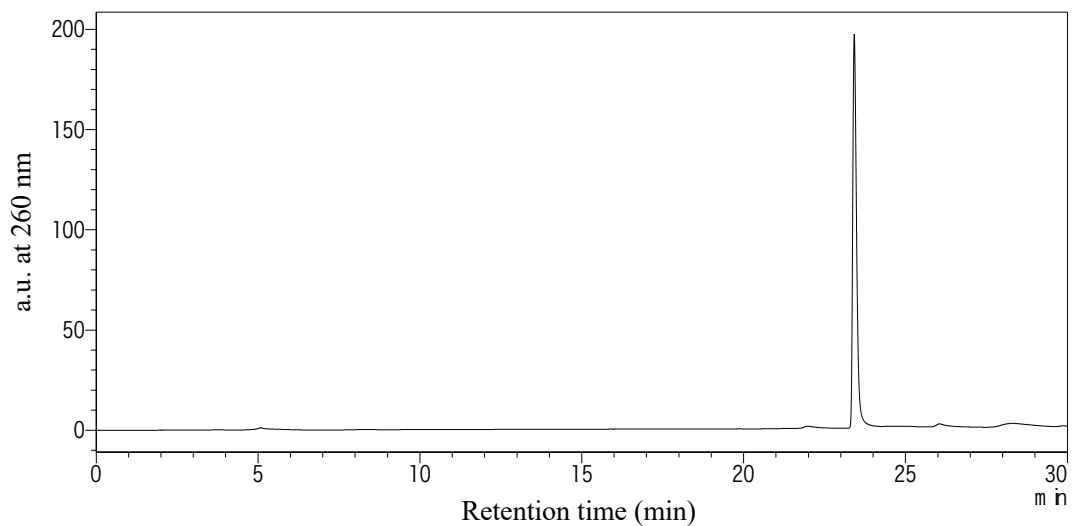

[calcd. (M-H)<sup>-</sup>: 4216.2, found: 4216.2]

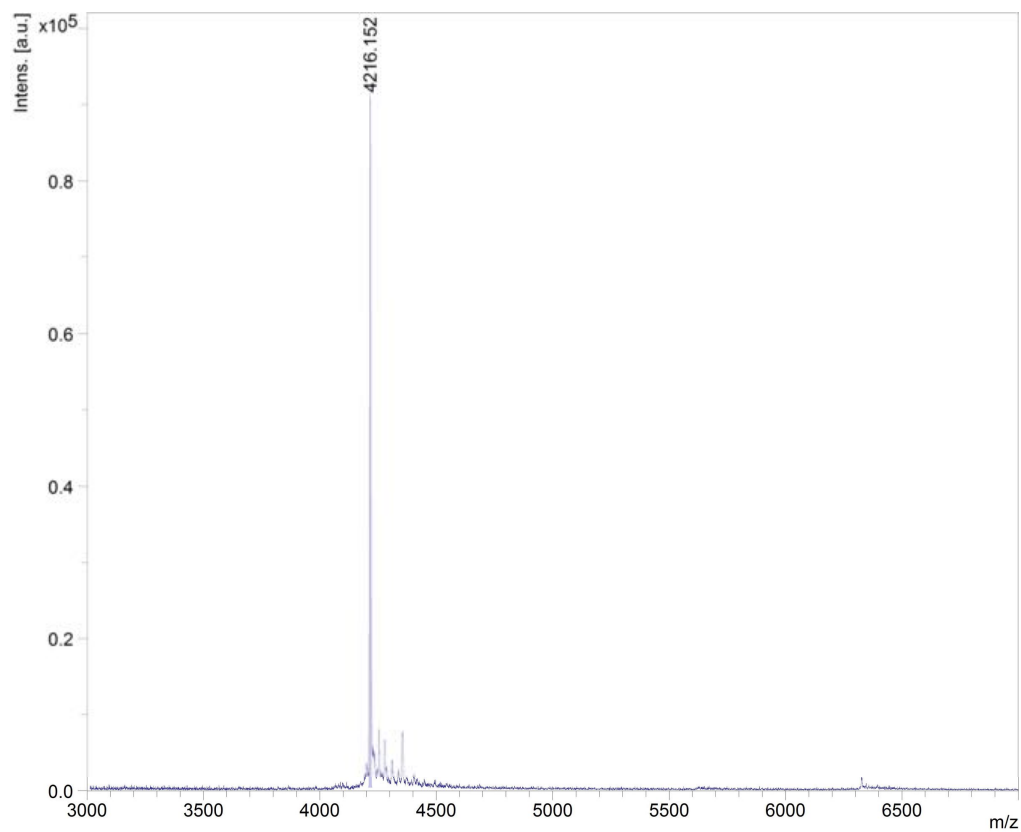

# UD-63

[B conc. MeCN: 7-40% (30 min)]

mV

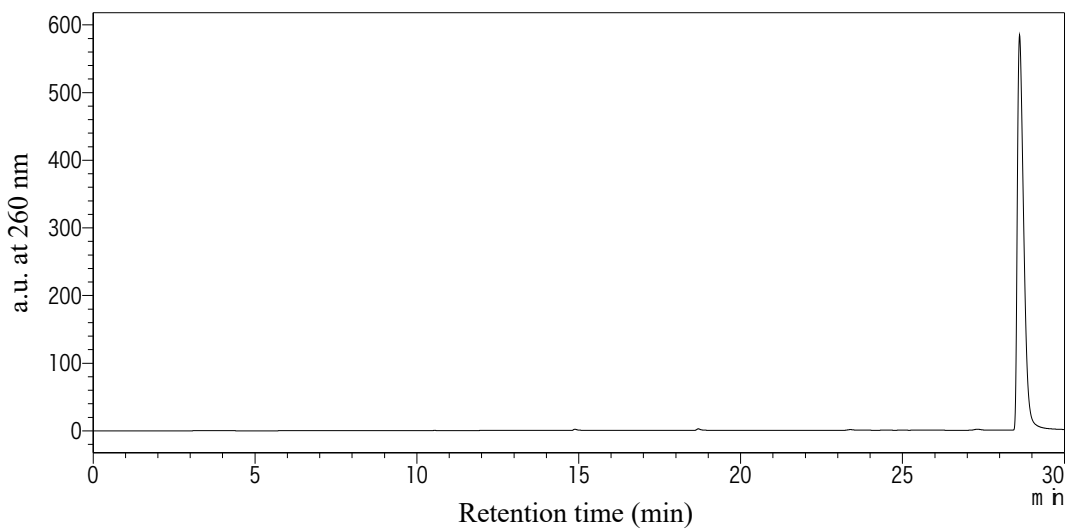

[calcd. (M-H)<sup>-</sup>: 4362.0, found: 4362.7]

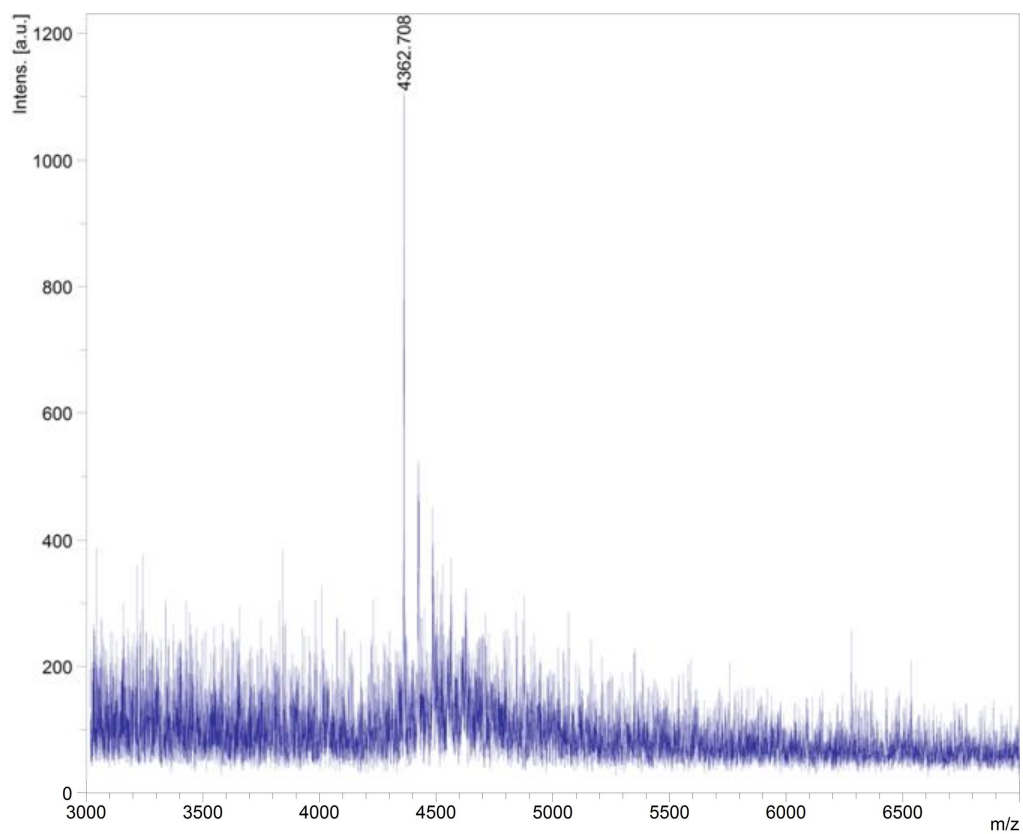



**UD-64**

[B conc. MeCN: 10-50% (30 min)]

mV

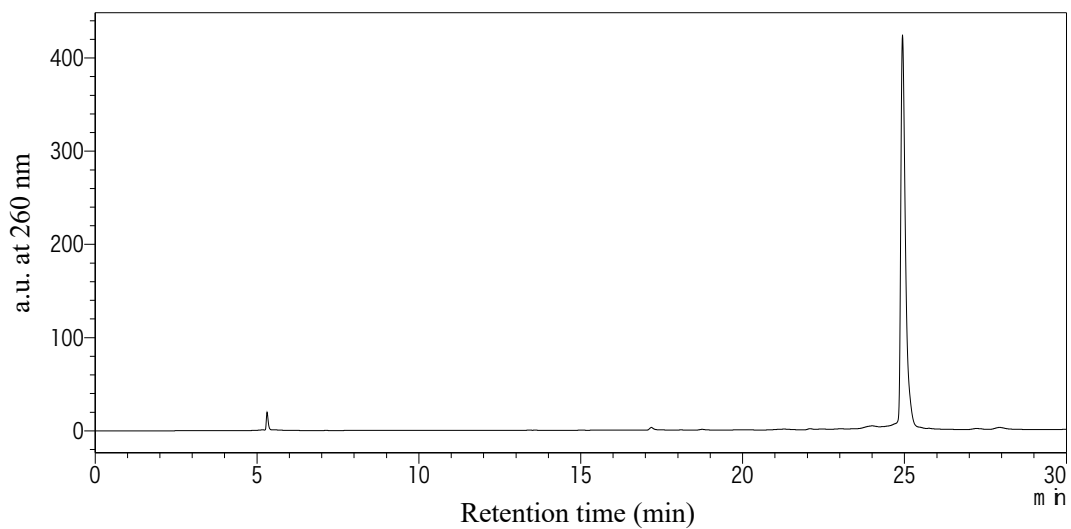

[calcd. (M-H)<sup>-</sup>: 4312.2, found: 4309.9]

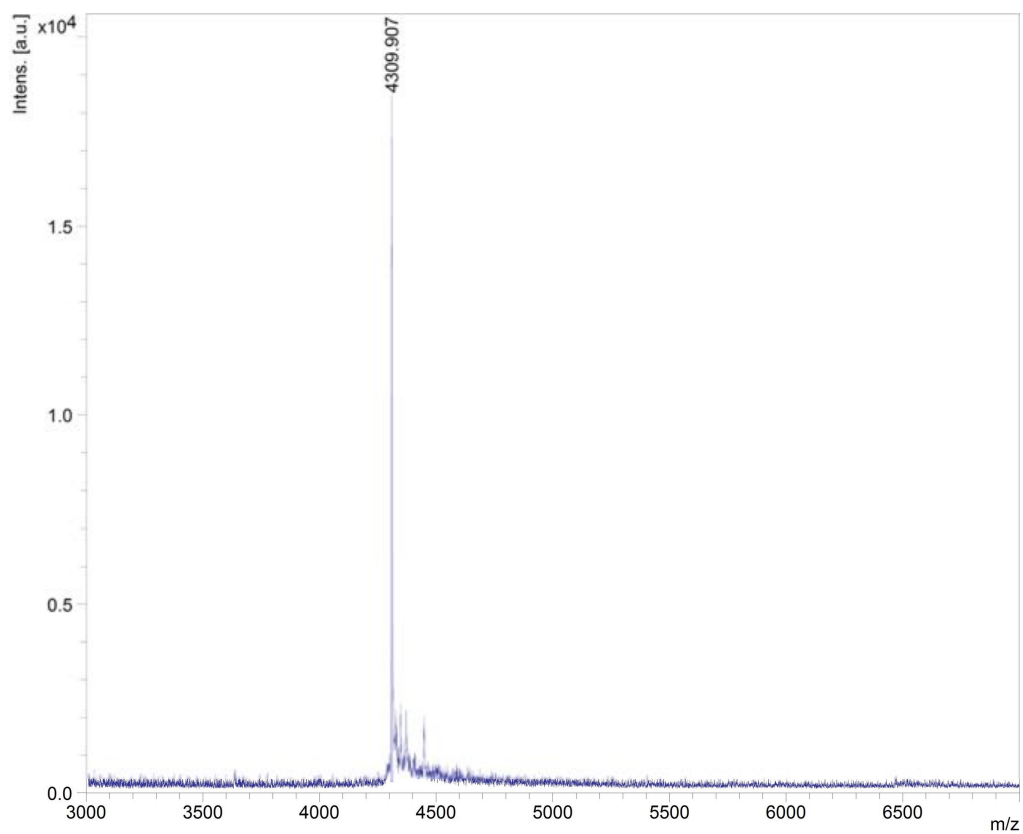

**UD-65**

[B conc. MeCN: 10-50% (30 min)]

mV

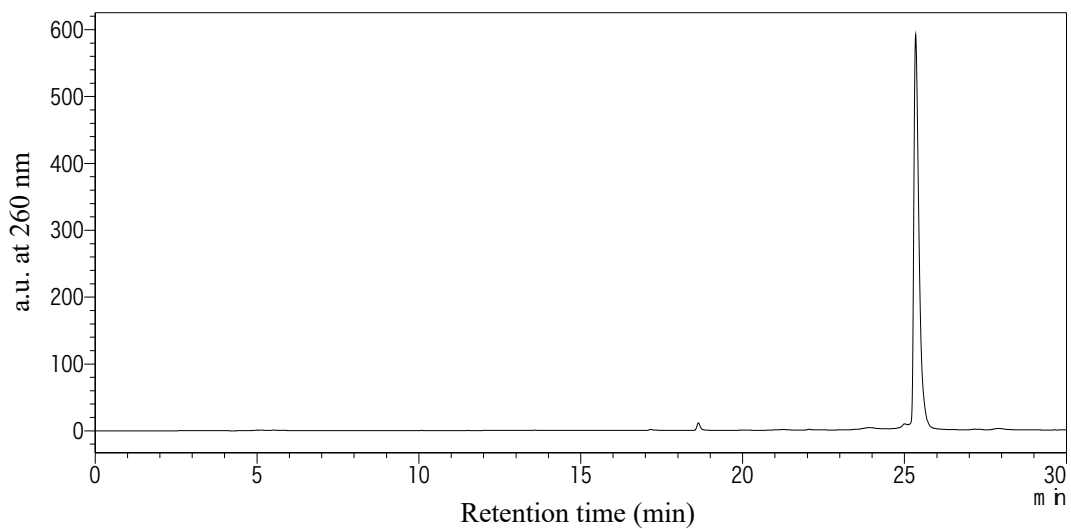

[calcd. (M-H)<sup>-</sup>: 4330.2, found: 4329.1]

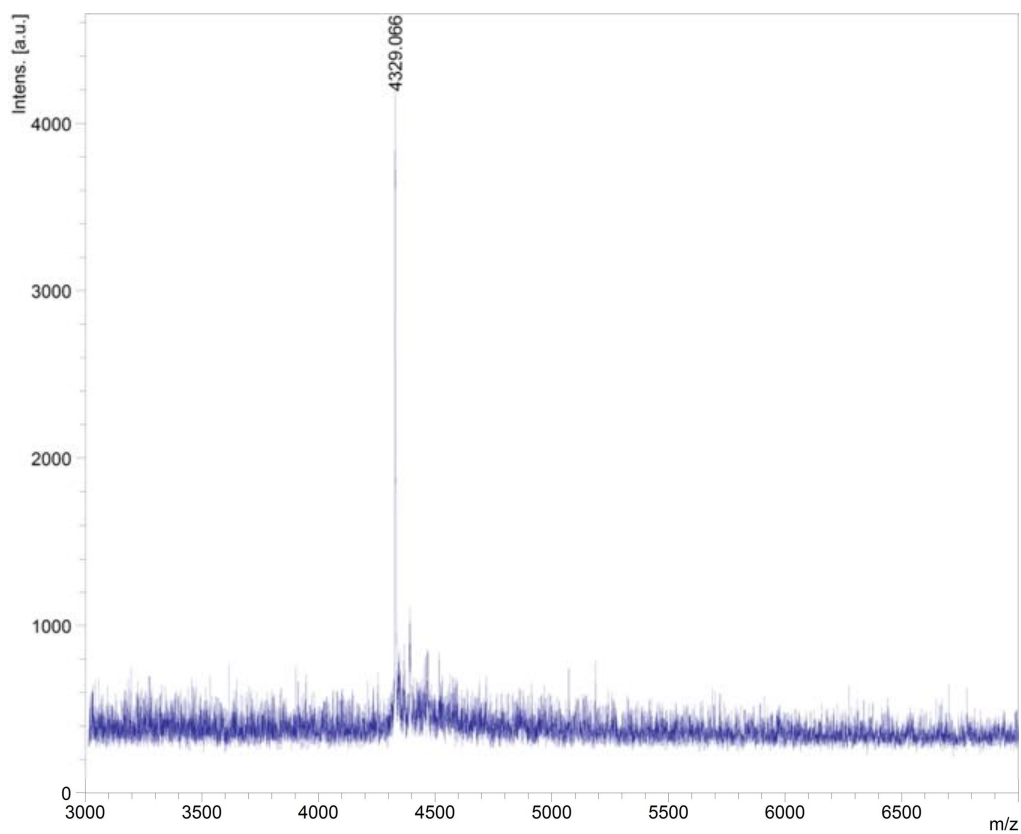

**UD-66**

[B conc. MeCN: 10-50% (30 min)]

mV

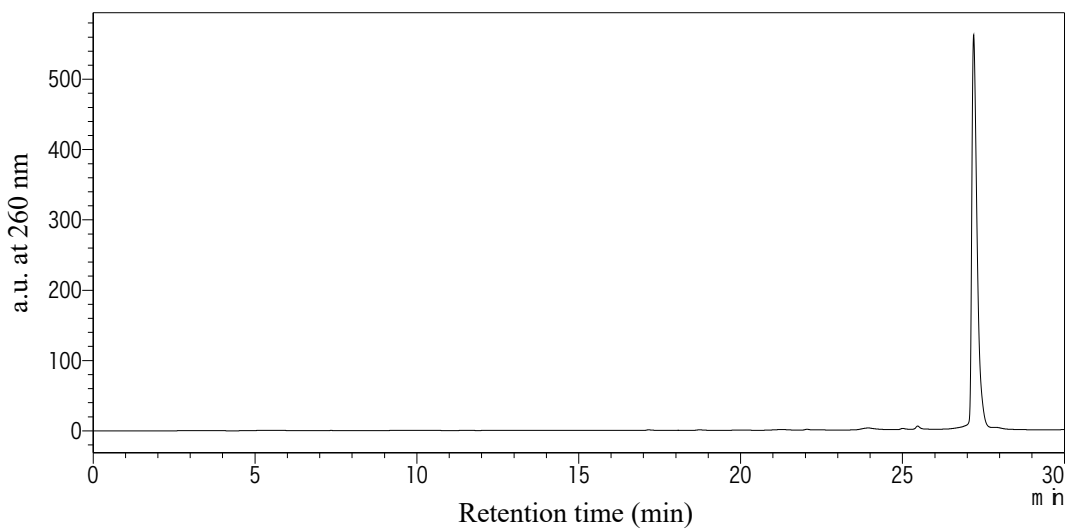

[calcd. (M-H)<sup>-</sup>: 4346.7, found: 4345.9]

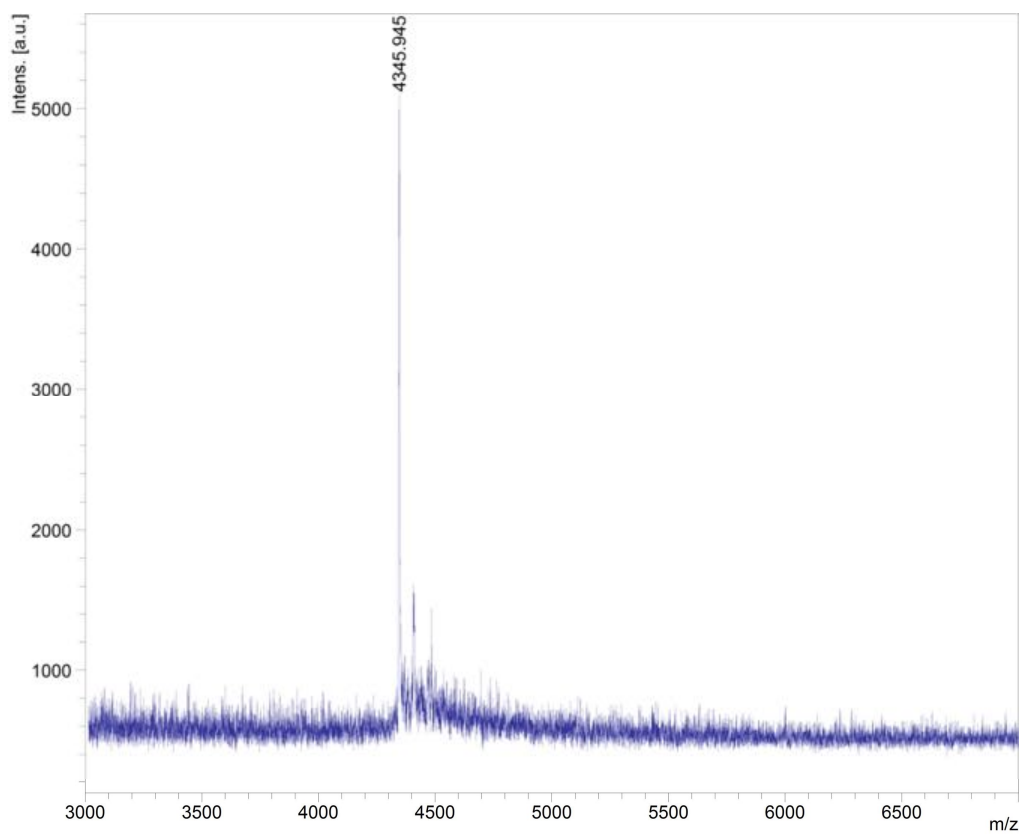

**UD-67**

[B conc. MeCN: 7-40% (30 min)]

mV

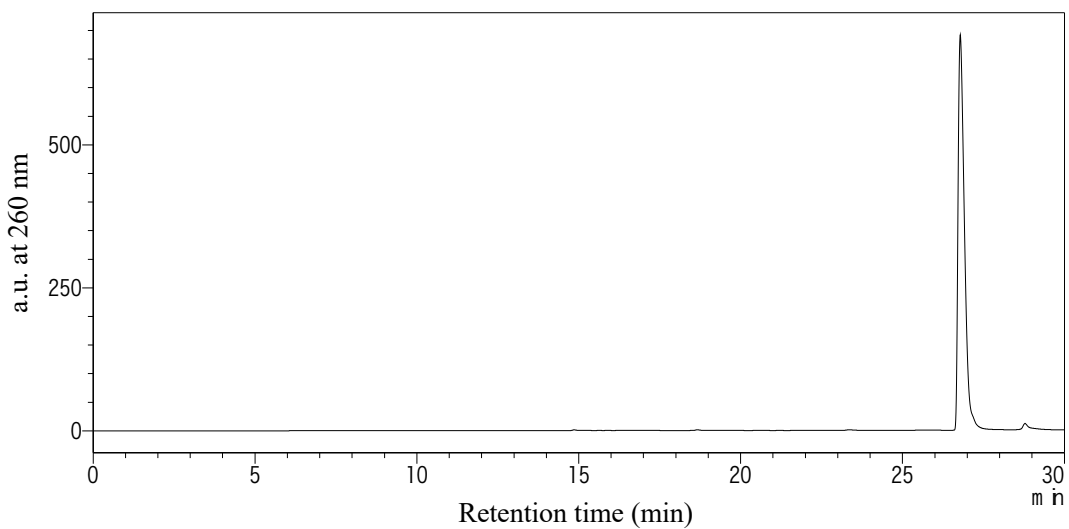

[calcd. (M-H)<sup>-</sup>: 4350.0, found: 4351.6]

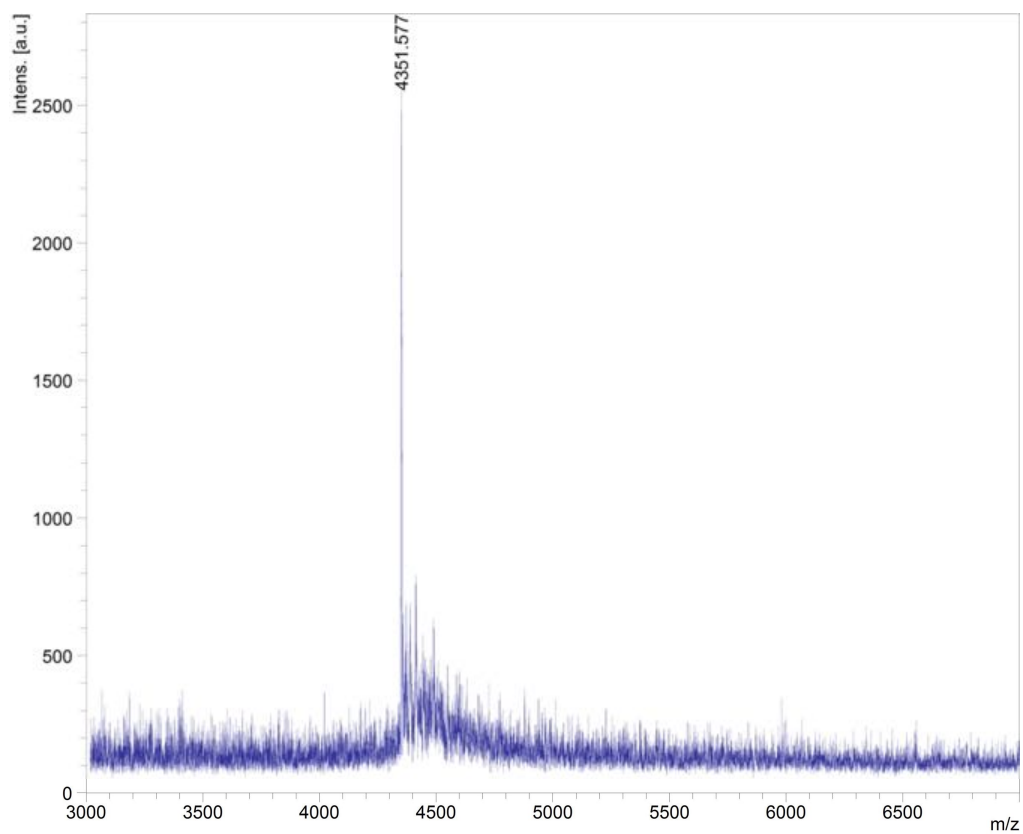

**UD-68**

[B conc. MeCN: 10-50% (30 min)]

mV

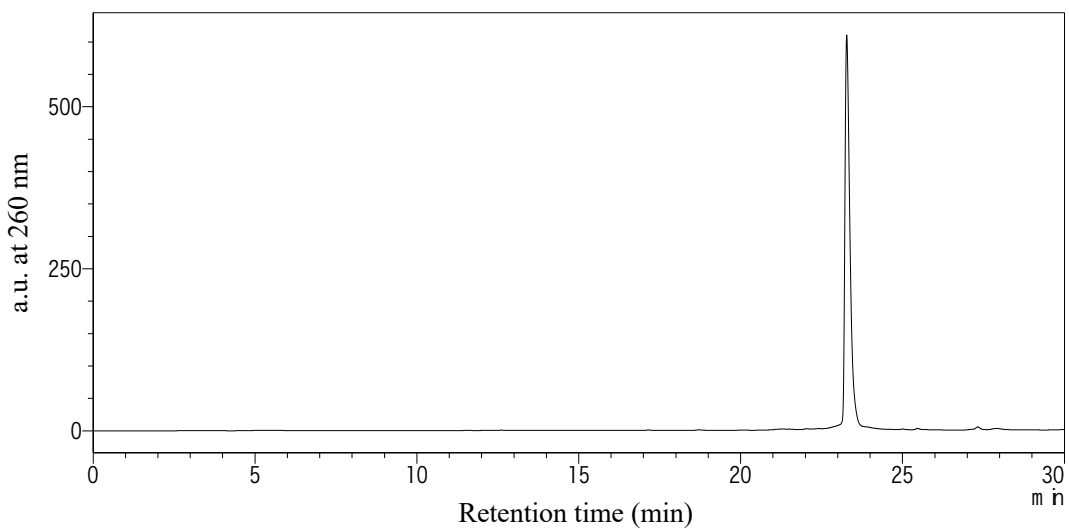

[calcd. (M-H)<sup>-</sup>: 4300.2, found: 4300.0]

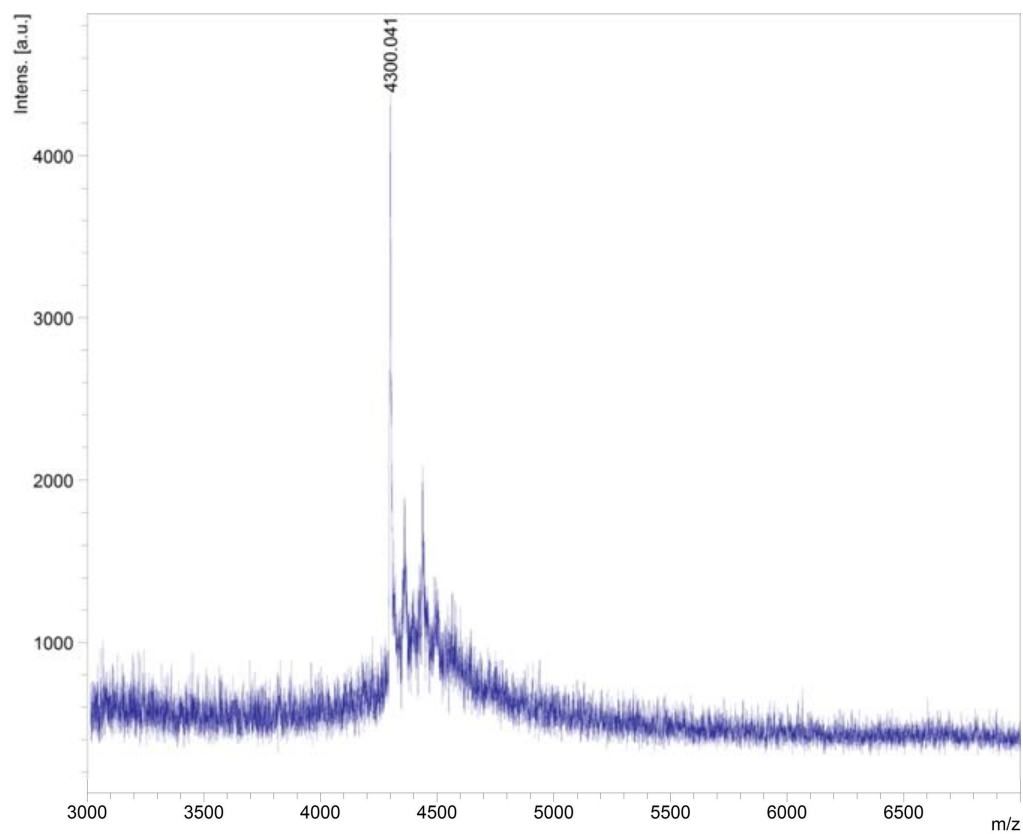

**UD-69**

[B conc. MeCN: 10-50% (30 min)]

mV

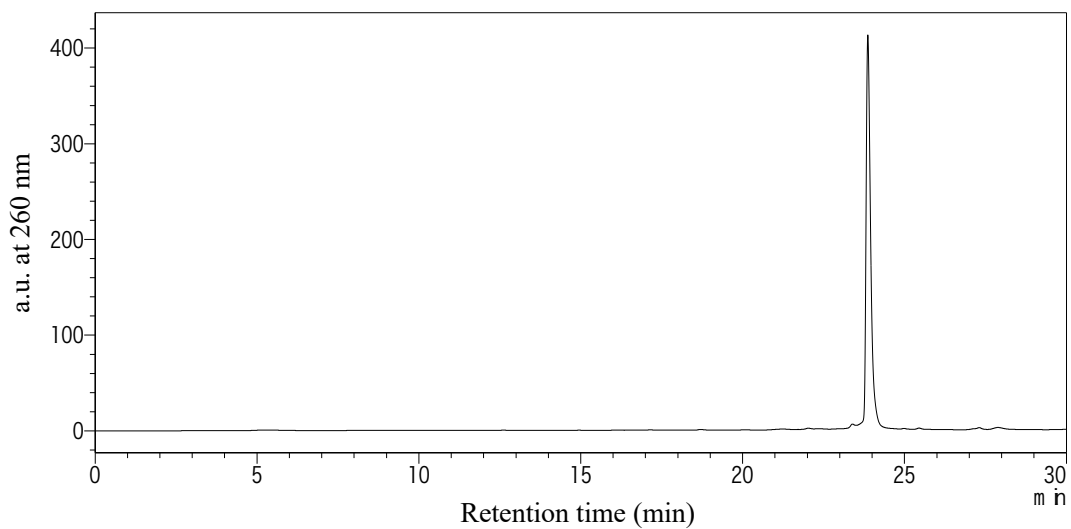

[calcd. (M-H)<sup>-</sup>: 4318.2, found: 4318.6]

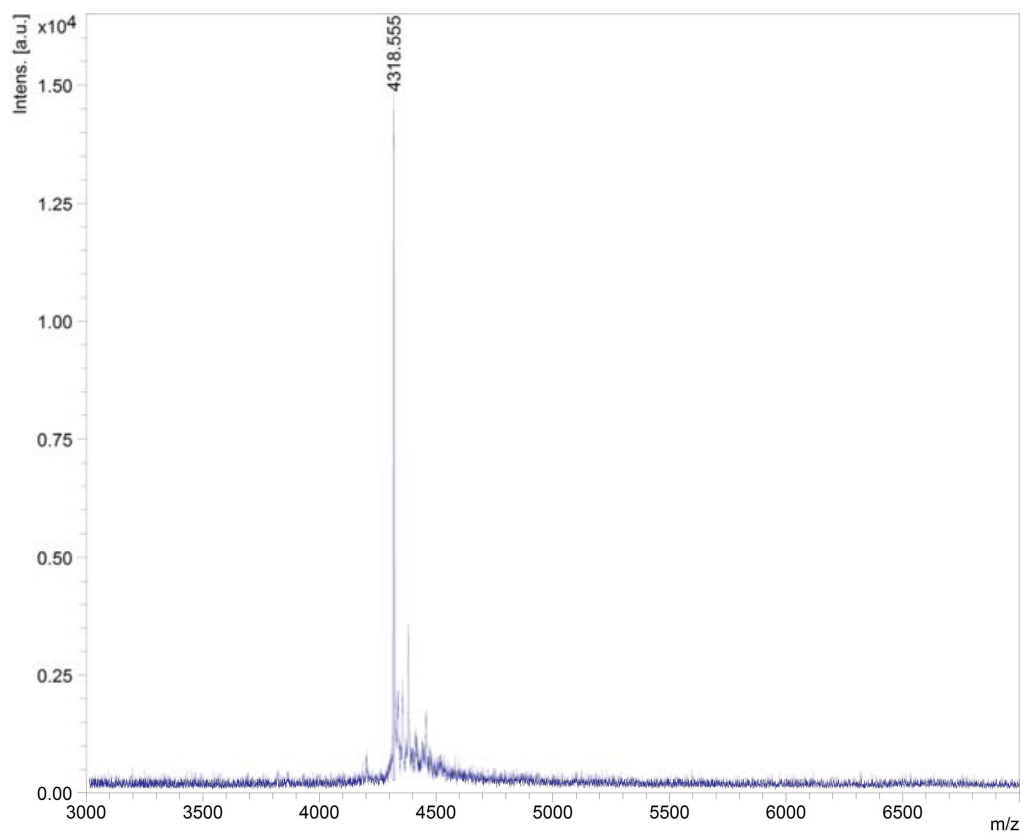

**UD-70**

[B conc. MeCN: 10-50% (30 min)]

mV

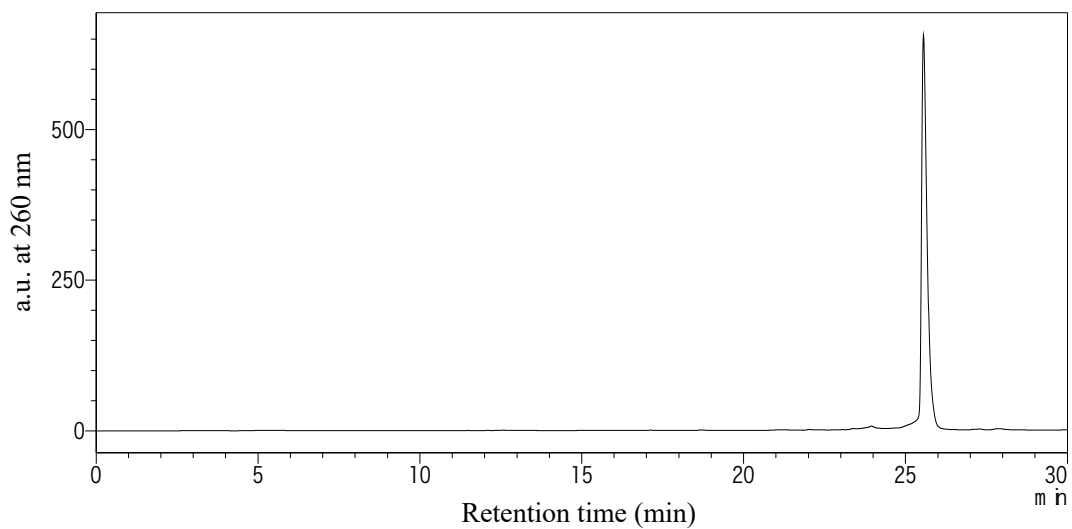

[calcd. (M-H)<sup>-</sup>: 4334.7, found: 4333.9]

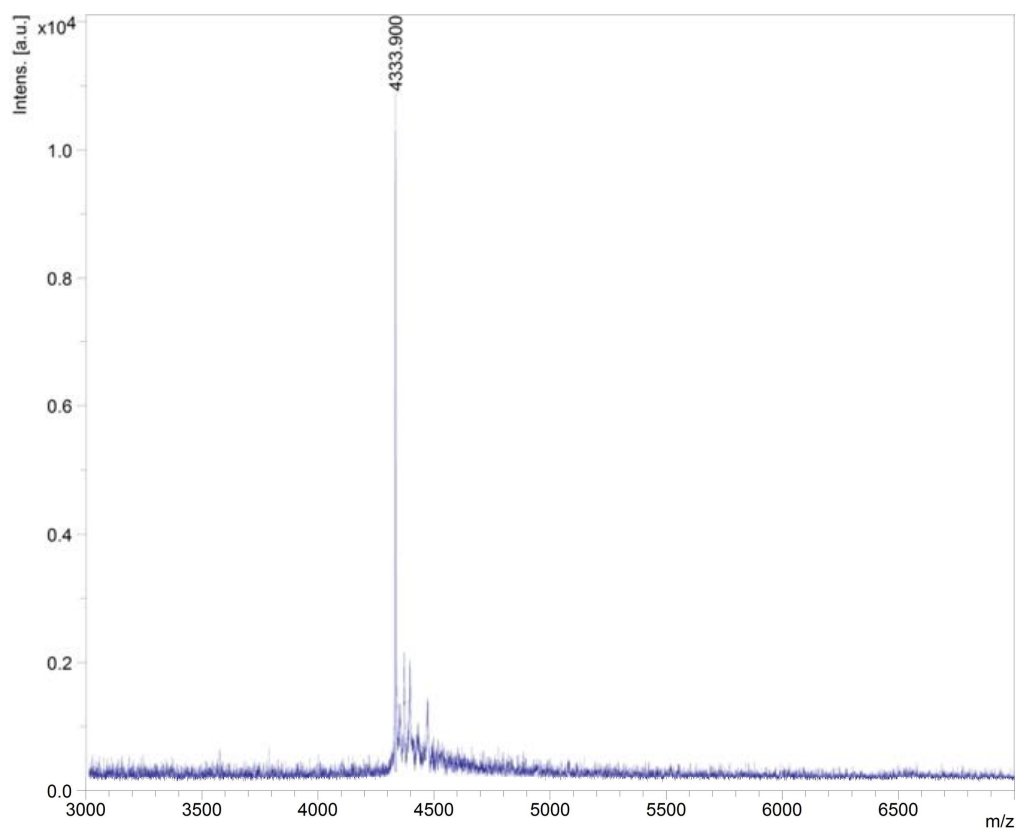

**UD-71**

[B conc. MeCN: 7-40% (30 min)]

mV

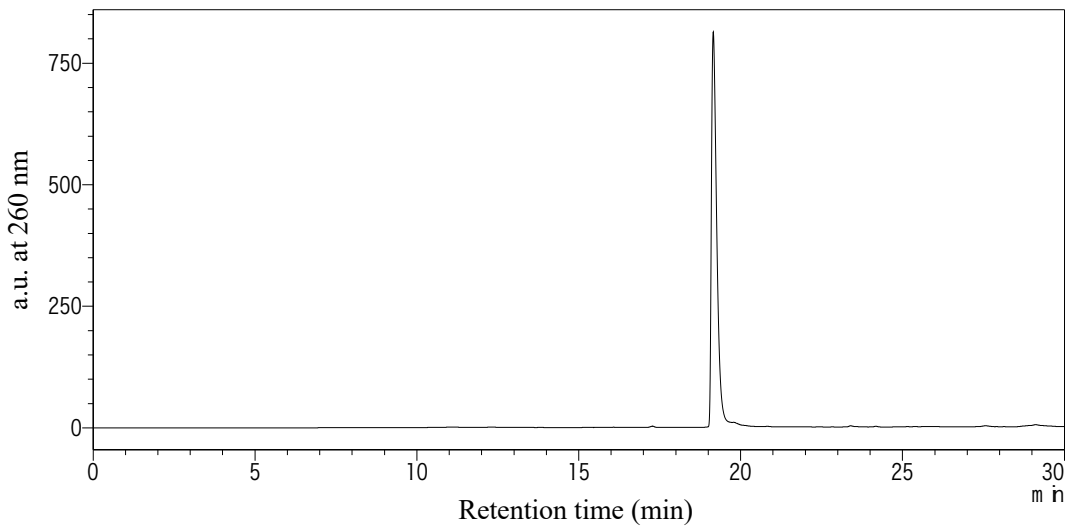

[calcd. (M-H)<sup>-</sup>: 4267.2, found: 4267.5]

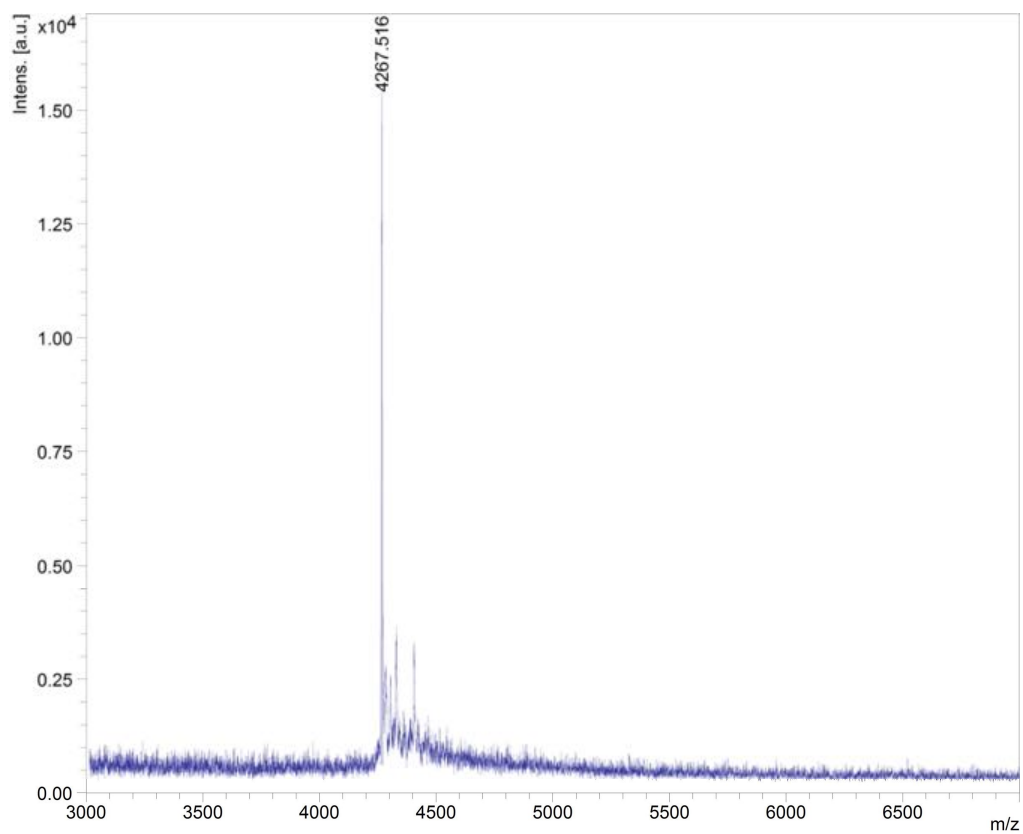



**UD-72**

[B conc. MeCN: 7-40% (30 min)]

mV

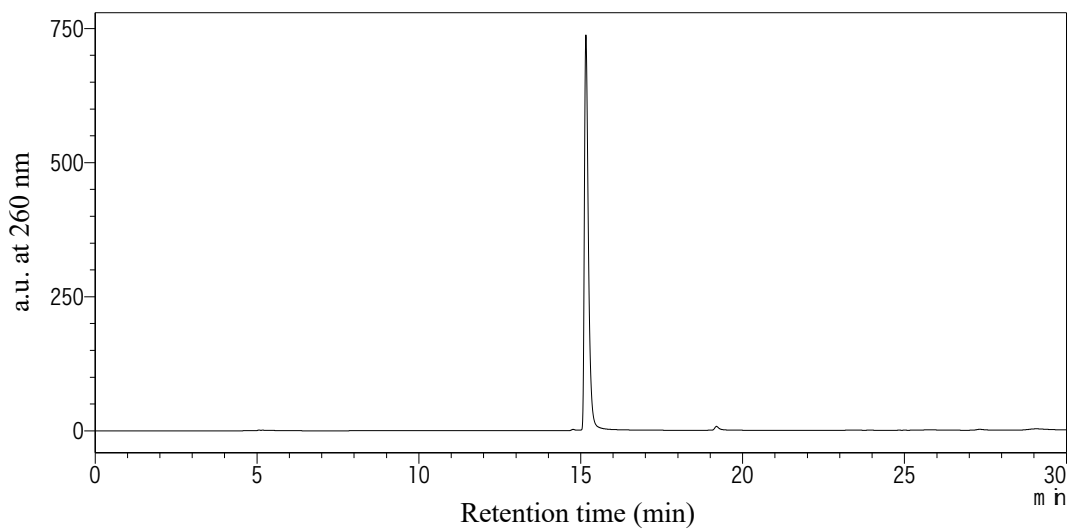

[calcd. (M-H)<sup>-</sup>: 4310.2, found: 4310.3]

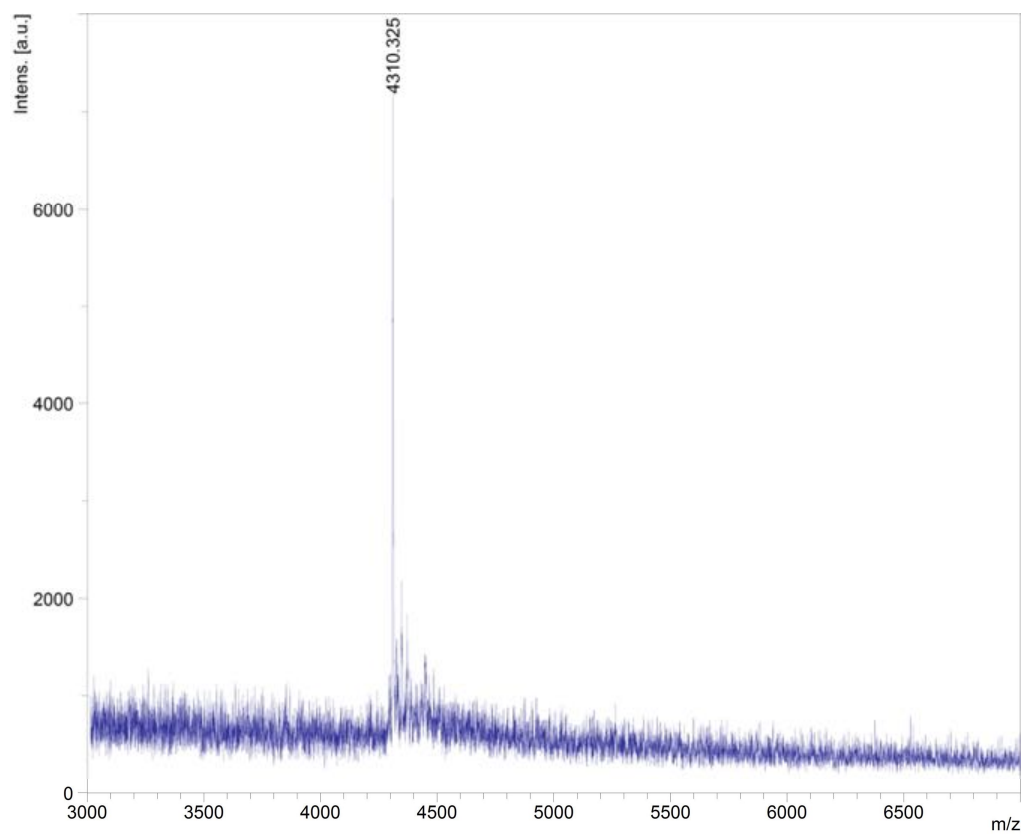

**UD-73**

[B conc. MeCN: 7-40% (30 min)]

mV

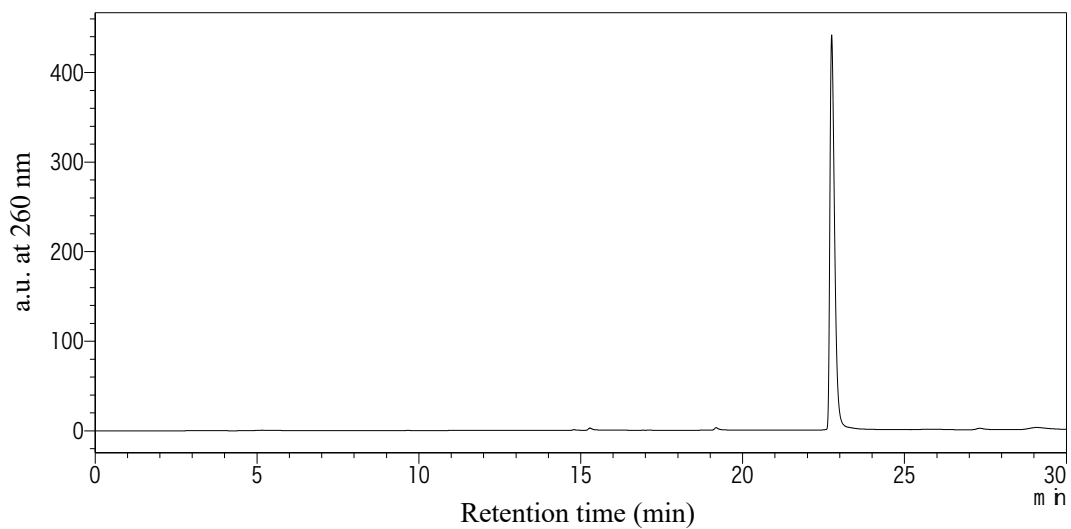

[calcd. (M-H)<sup>-</sup>: 4307.2, found: 4306.4]

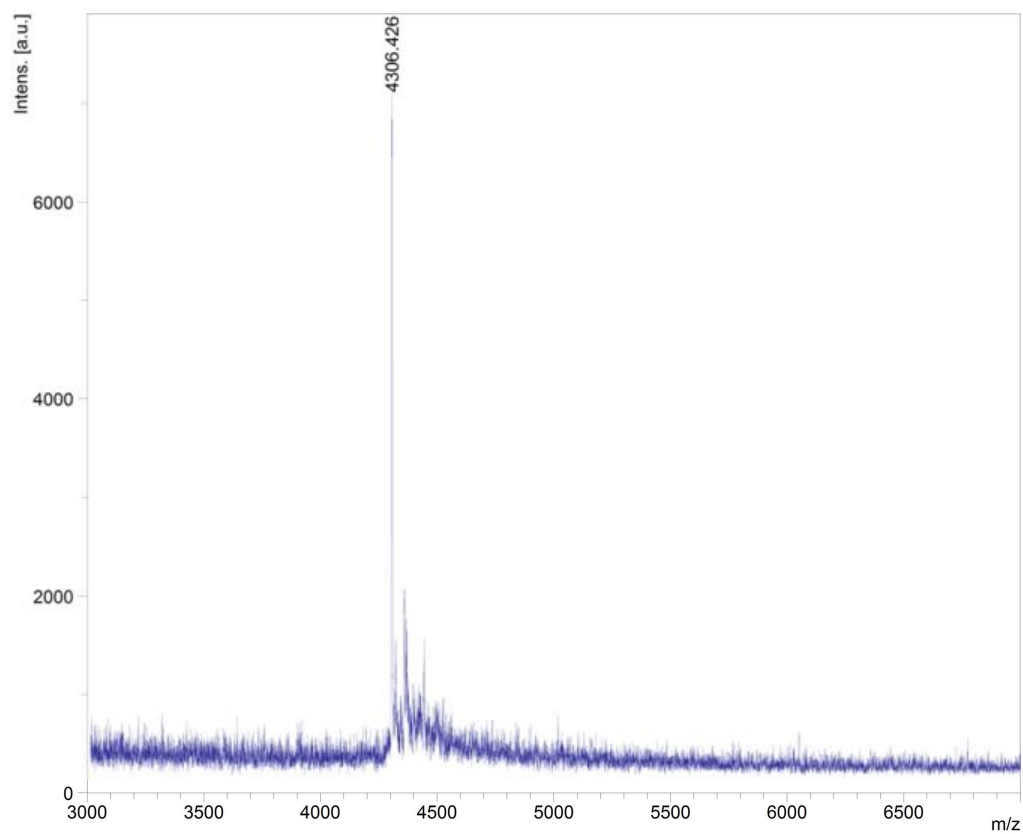

**UD-74**

[B conc. MeCN: 7-40% (30 min)]

mV

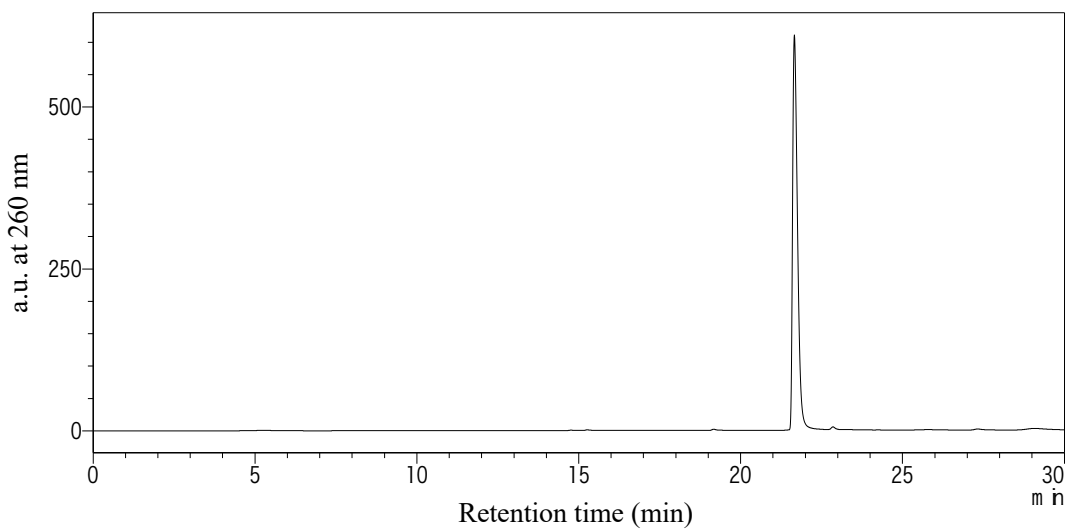

[calcd. (M-H)<sup>-</sup>: 4315.2, found: 4314.6]

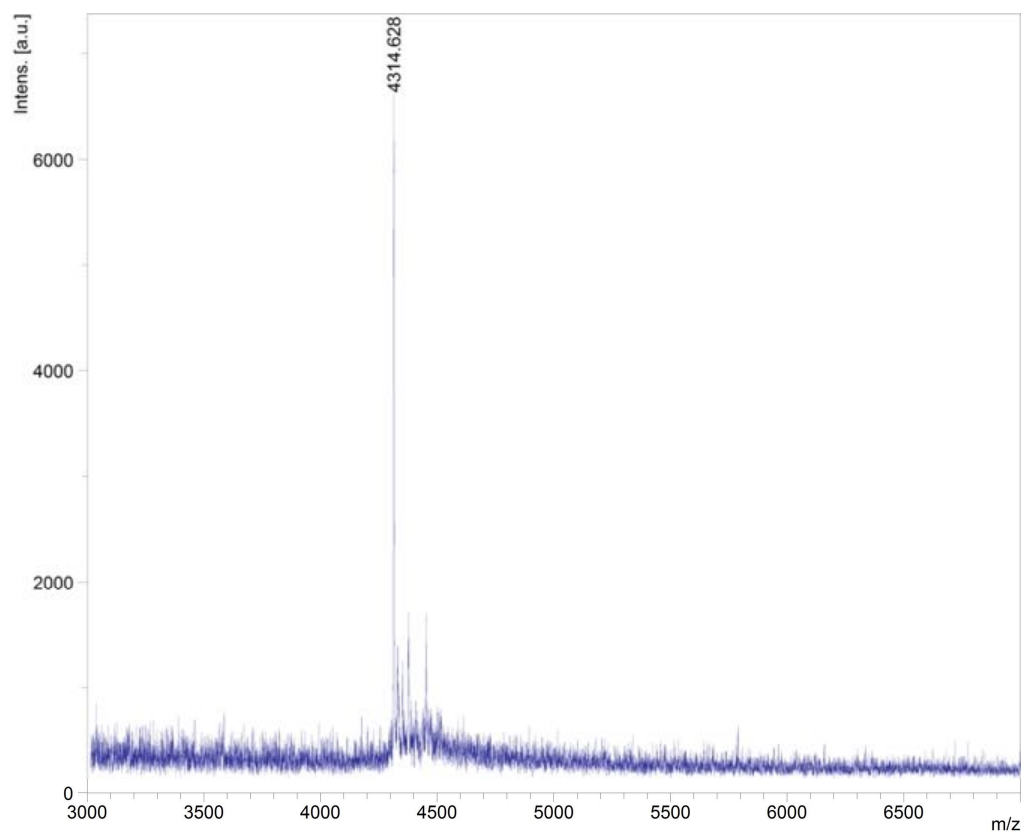

**UD-75**

[B conc. MeCN: 7-40% (30 min)]

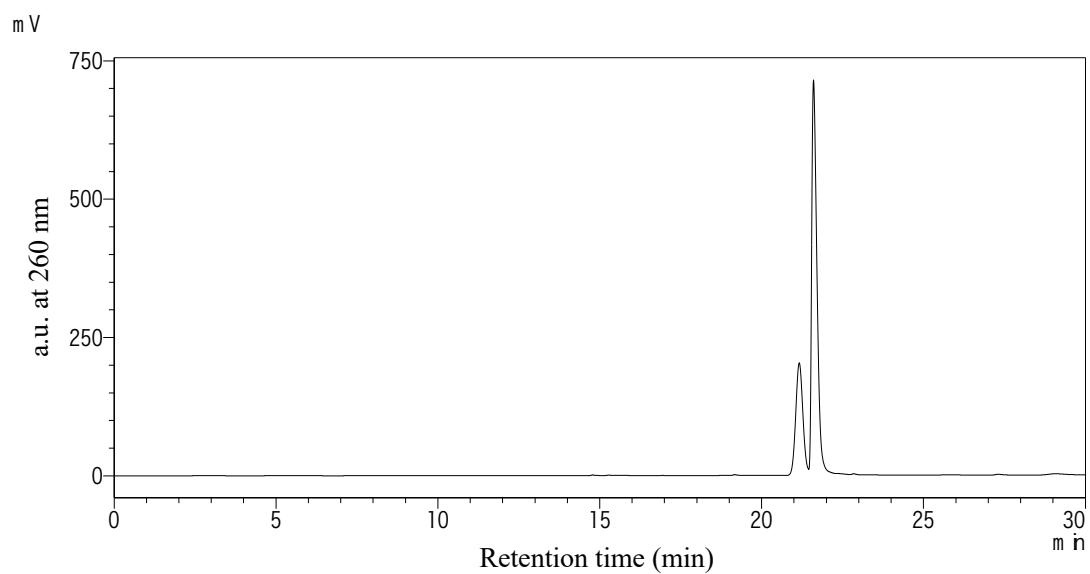

[calcd. (M-H)<sup>-</sup>: 4301.2, found: 4302.7]

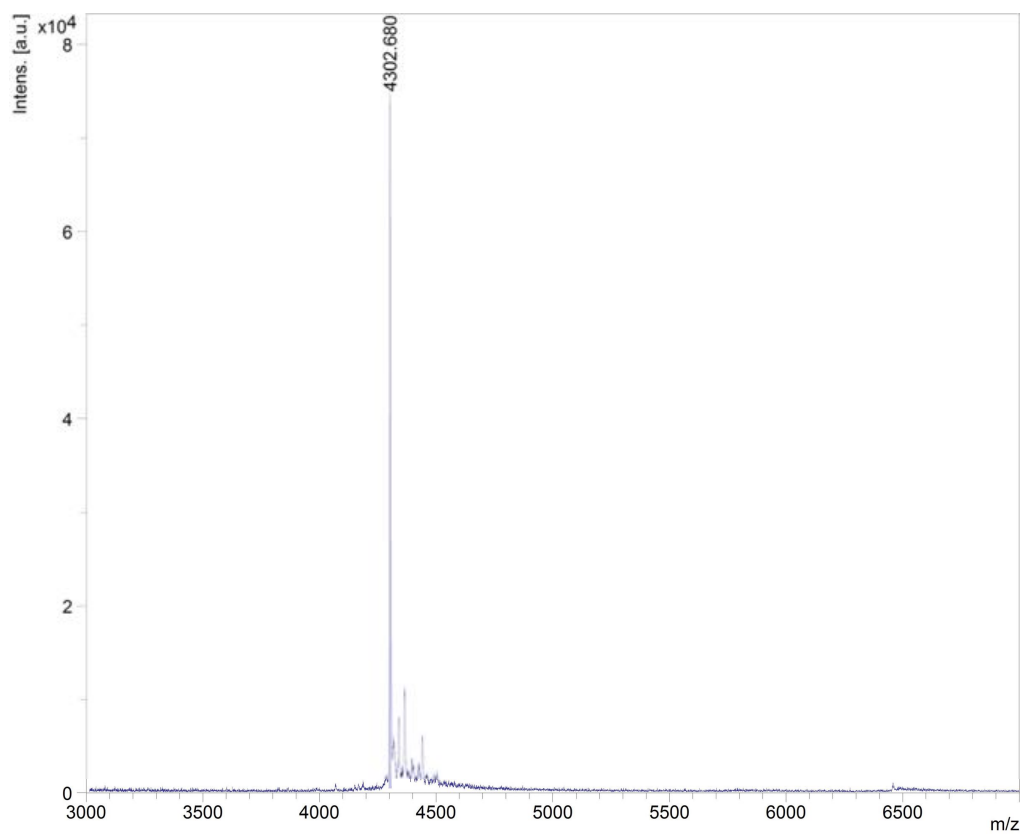

**UD-76**

[B conc. MeCN: 7-40% (30 min)]

mV

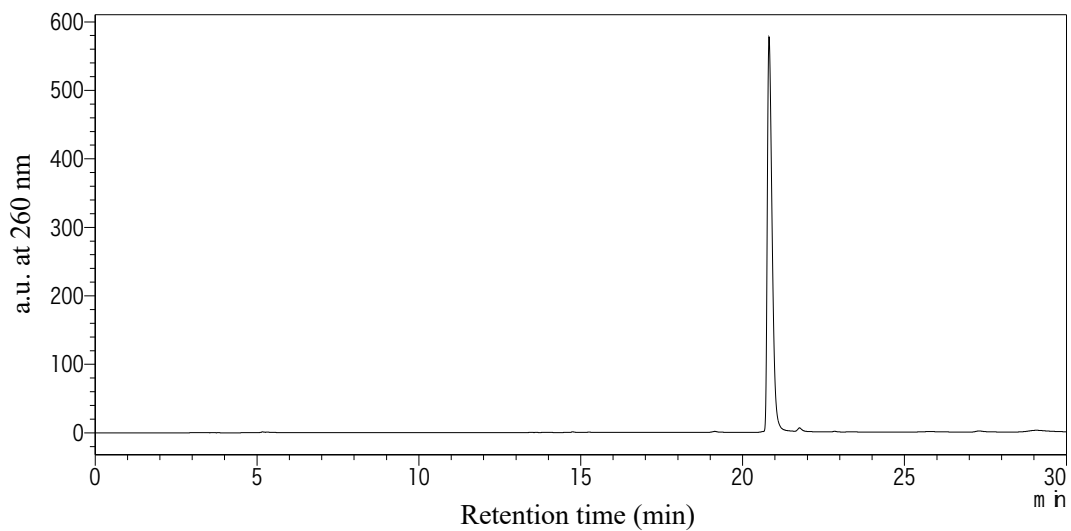

[calcd. (M-H)<sup>-</sup>: 4293.2, found: 4291.9]

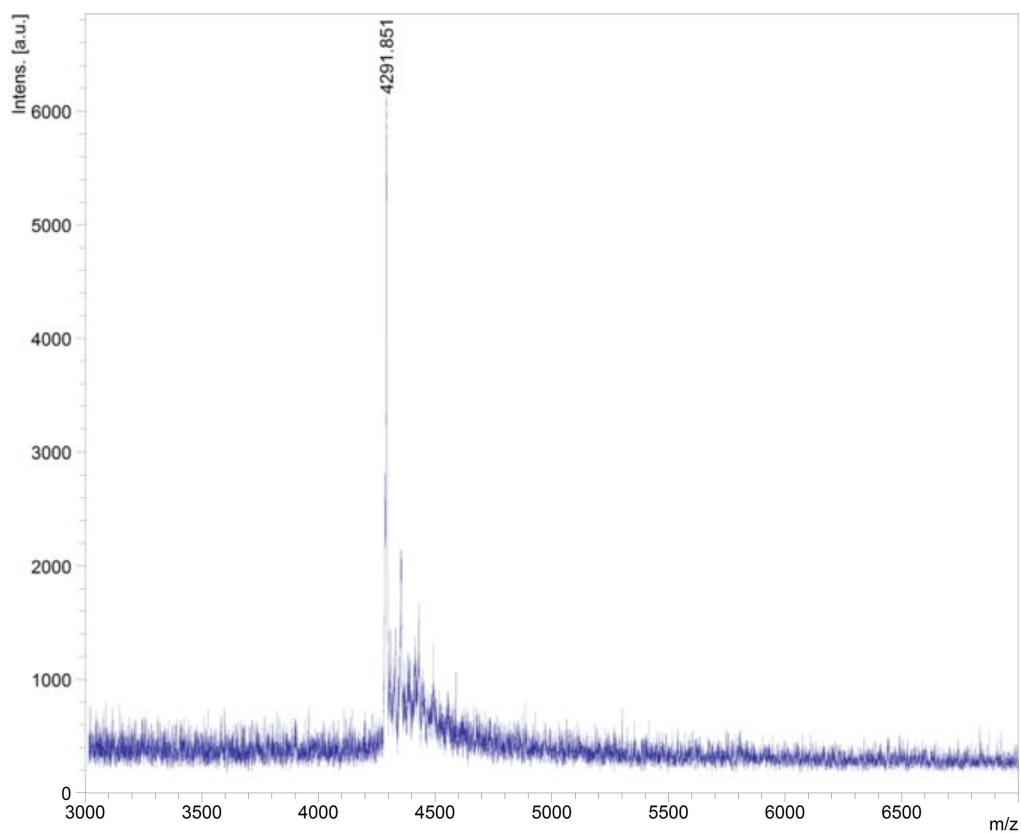

UD-77

[B conc. MeCN: 7-40% (30 min)]

mV

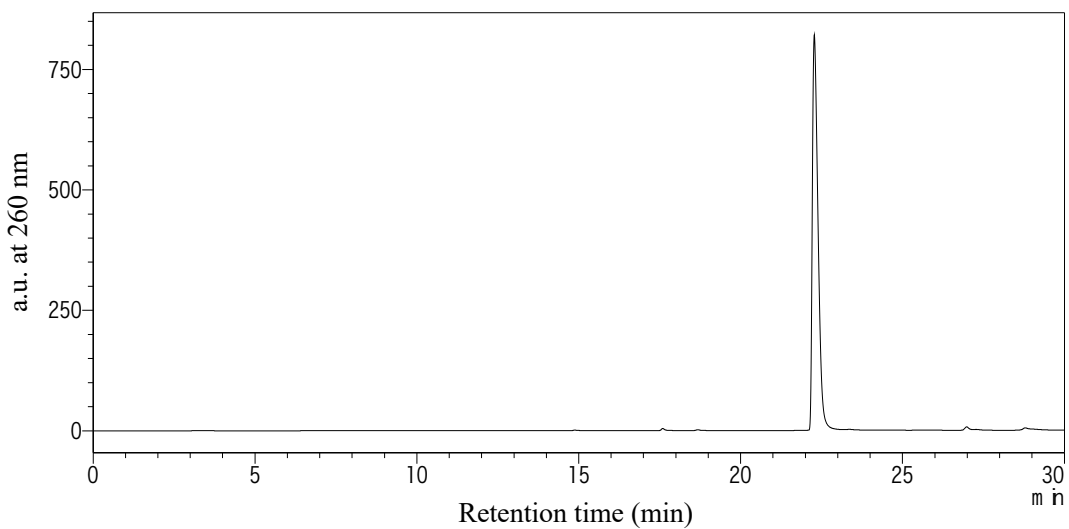

[calcd. (M-H)<sup>-</sup>: 4366.0, found: 4366.3]

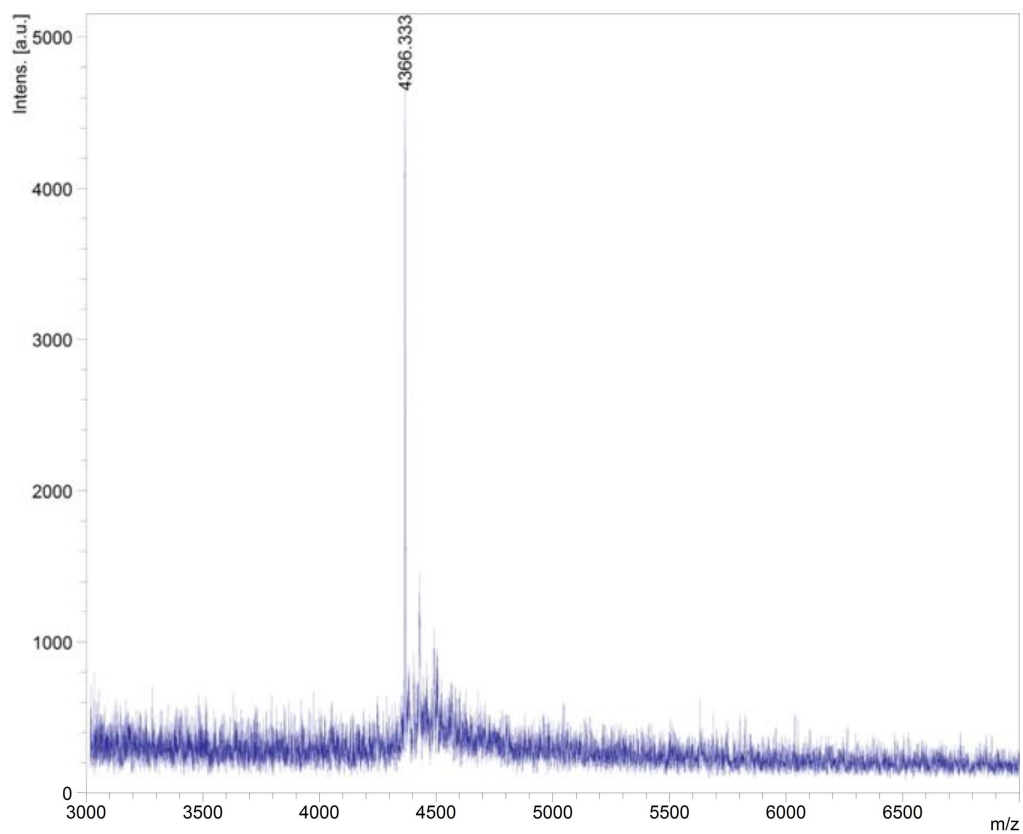

**UD-78**

[B conc. MeCN: 10-50% (30 min)]

mV

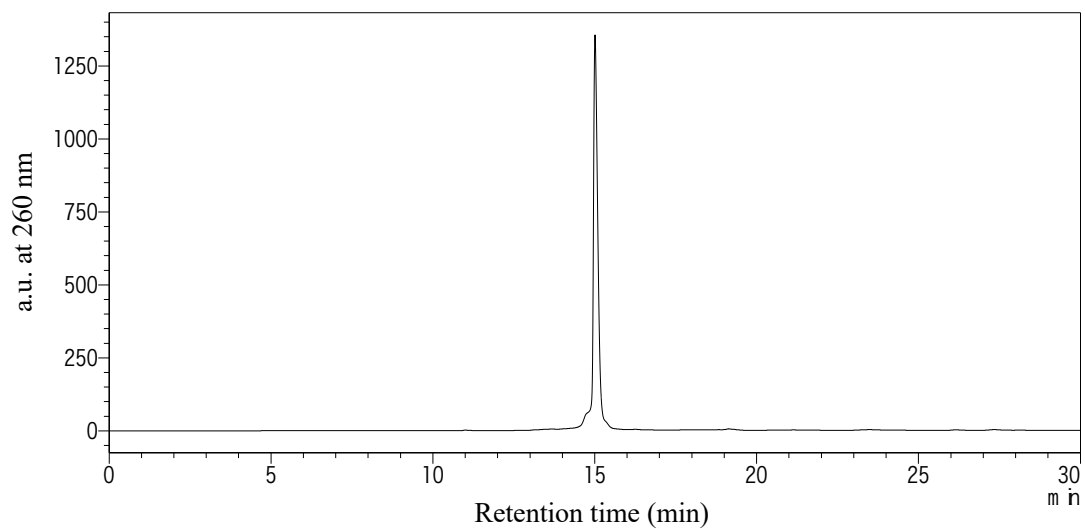

[calcd. (M-H)<sup>-</sup>: 4302.2, found: 4305.6]

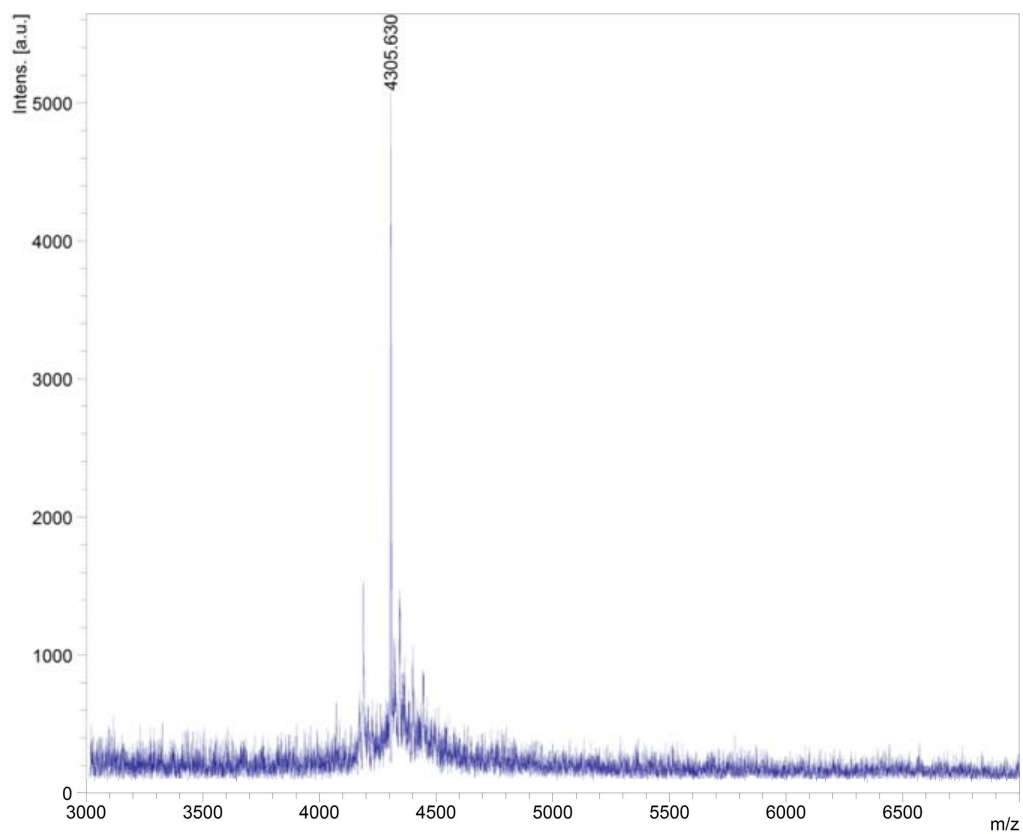

**UD-79**

[B conc. MeCN: 10-50% (30 min)]

mV

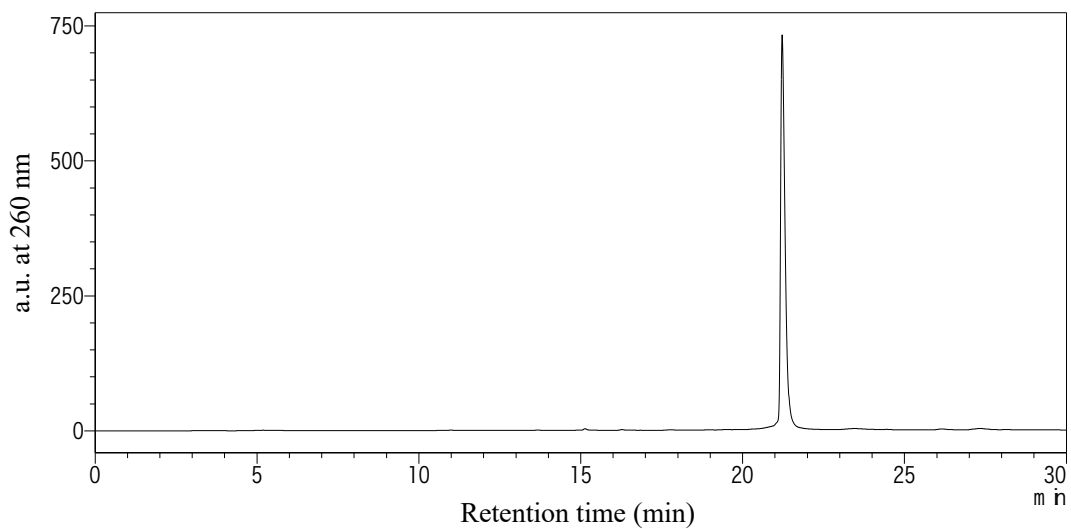

[calcd. (M-H)<sup>-</sup>: 4391.3, found: 4390.4]

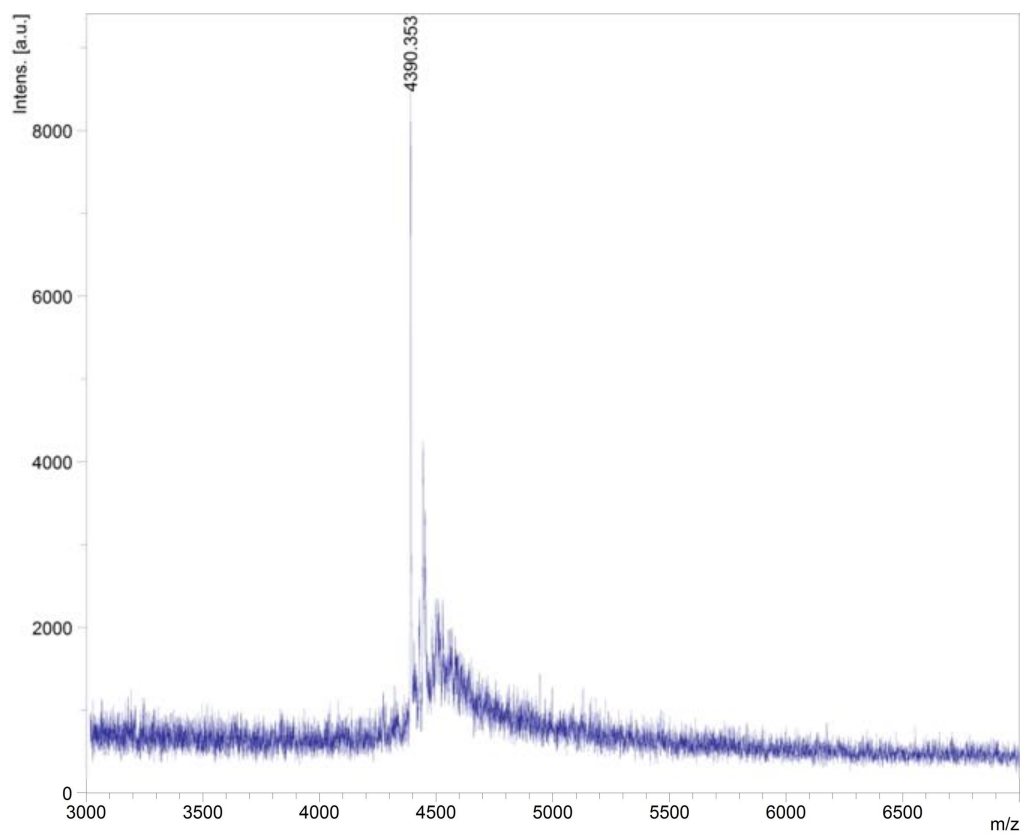

Supplement: d1cb00240f1.pdf [file d1cb00240f1.pdf]
